# Supplementary material for: Water enabled, nickel-catalyzed highly chemoselective C-allylation of (NH)-indoles employing alcohols
Source: Royal Society of Chemistry journal article supplement (doi:10.1039/d2gc00921h), 2022-01-01

## Supporting Information

### Water Enabled, Nickel-Catalyzed Highly Chemoselective C- Allylation of (NH)-Indoles Employing Alcohols

Gargi Nikhil Vaidya, Shyam Kumar Lokhande, Sangita Dattatray Shinde,  
Dinesh Parshuram Satpute, Garvita Narang, Dinesh Kumar\*

Department of Medicinal Chemistry,  
National Institute of Pharmaceutical Education and Research (NIPER) –  
Ahmedabad, Palaj, Gandhinagar-382355, Gujarat, India

## Table of Contents

|                                                                                |    |
|--------------------------------------------------------------------------------|----|
| 1. General Method .....                                                        | 2  |
| 2. List of chemicals/reagents .....                                            | 4  |
| 3. Synthesis of authentic samples (Standard reference for GC-MS studies) ..... | 5  |
| 4. GC-MS studies.....                                                          | 7  |
| 5. Zeta-sizer study: Average micellar size for different surfactants .....     | 14 |
| 6. Effect of SDOSS concentration.....                                          | 15 |
| 7. Optimization study .....                                                    | 17 |
| 8. Screening of Ni(II)-Catalyst for C <sub>3</sub> -allylation .....           | 18 |
| 9. Representative experimental procedure.....                                  | 22 |
| 10. Spectroscopic characterization data.....                                   | 23 |
| 11. Role of water toward the activation of allylic alcohols.....               | 28 |
| 12. Selectivity study.....                                                     | 32 |
| 13. Hammett Plot analysis.....                                                 | 34 |
| 14. Scale-up study.....                                                        | 35 |
| 15. Recyclability study .....                                                  | 36 |
| 16. E-factor determination for the developed protocol:.....                    | 38 |
| 17. NMR spectra ( <sup>1</sup> H, <sup>13</sup> C, <sup>19</sup> F NMR): ..... | 39 |

## 1. General Method

Unless otherwise noted, all manipulations (reactions) were carried out in oven-dried glasswares in glovebox under an atmosphere of dinitrogen ( $O_2$  and  $H_2O$  level of  $<0.1$  ppm) without using standard Schlenk-line techniques and monitored by thin layer chromatography (TLC). Concentration of reaction mixtures were done under reduced pressure by rotary evaporation at 25–40 °C at an appropriate pressure. Purified compounds were further dried under vacuum. Yields refer to purified and spectroscopically pure compounds, unless otherwise stated.

### Chemicals

All the catalysts, ligands were purchased from Sigma-Aldrich®. All the other reagents like starting materials, additives, bases were used as received from commercial suppliers, unless otherwise stated and were mainly purchased from Alfa Aesar®, Sigma-Aldrich®.

### Solvents

Ethyl acetate, Hexane, Diethyl ether were purchased from Fisher Scientific, Qualigen and used as received. Anhydrous solvents (Toluene, THF, DMSO, DMF, MeCN, NMP, 1,4-Dioxane, Nitromethane, MeOH, *t*-BuOH) were obtained from Sigma Aldrich and used as received. All deuterated solvents were purchased from Sigma Aldrich.

### Surfactant

All the surfactants were obtained from Sigma Aldrich. SPGS-550M (2% w/w) and TPGS-750M (2% w/w) were used as received while PTS (15% w/w) was diluted using MiliQ water at 2% w/w concentration. Other surfactant including SDOSS (% w/w) concentrations mentioned were made using MiliQ water before using them for the reactions.

### Chromatography

Thin layer chromatography (TLC) was performed using Merck TLC plates pre-coated with 250  $\mu$ m thickness silica gel 60 F254 plates and visualized by fluorescence quenching under UV light. All the compounds were purified using column chromatography with 100-200 mesh size silica or with flash chromatography on CombiFlash®Rf+ Lumen™, Teledyne ISCO using RediSep® Rf prepacked columns (24g, CV 33 mL-35 mL/min) and eluted using either EtOAc: Hexane as mobile phase.

### Spectroscopy and Instruments:

**NMR:**  $^1H$  NMR and  $^{13}C$  NMR spectra were recorded on Bruker 500 MHz and 125 MHz spectrometers respectively using tetramethylsilane (1% v/v solution in the respective solvent) as an internal standard. Both  $^1H$  and  $^{13}C$  NMR chemical shifts were reported in parts per million downfield from tetramethylsilane ( $\delta=0$ ) with the solvent residual peak. For  $^1H$  NMR:  $CDCl_3$ ,  $\delta$ 7.26; For  $^{13}C$  NMR:  $CDCl_3$ ,  $\delta$ 77.16;  $^{19}F$  NMR spectra were referenced

using a unified chemical shift scale based on the  $^1\text{H}$  resonance of tetramethylsilane (1% v/v solution in the respective solvent). Coupling constants ( $J$ ) are reported in hertz (Hz). Standard abbreviations indicating multiplicity were used as follows: s (singlet), b (broad), d (doublet), t (triplet), q (quartet) and m (multiplet).

**High-resolution mass spectra (HRMS):** spectra of compounds were obtained at Agilent Q-TOF spectrometer in positive (ESI<sup>+</sup>) ion mode.

**GC-MS:** Gas Chromatography-Mass Spectrometry data (GC-MS) was recorded on an Agilent Technologies 8890 GC system coupled with Agilent Technologies 7010B mass spectrometer (GC/TQ) using Agilent 19091S-433UI: 0602217H (30m x 250  $\mu\text{m}$  x 0.25  $\mu\text{m}$ ) purchased from Agilent Technologies.

**Zeta-sizer:** Dynamic light scattering (DLS) for particle size and PDI was utilised through zetasizer (NanoZS90, Malvern Instruments, Cambridge, UK).

## 2. List of chemicals/reagents

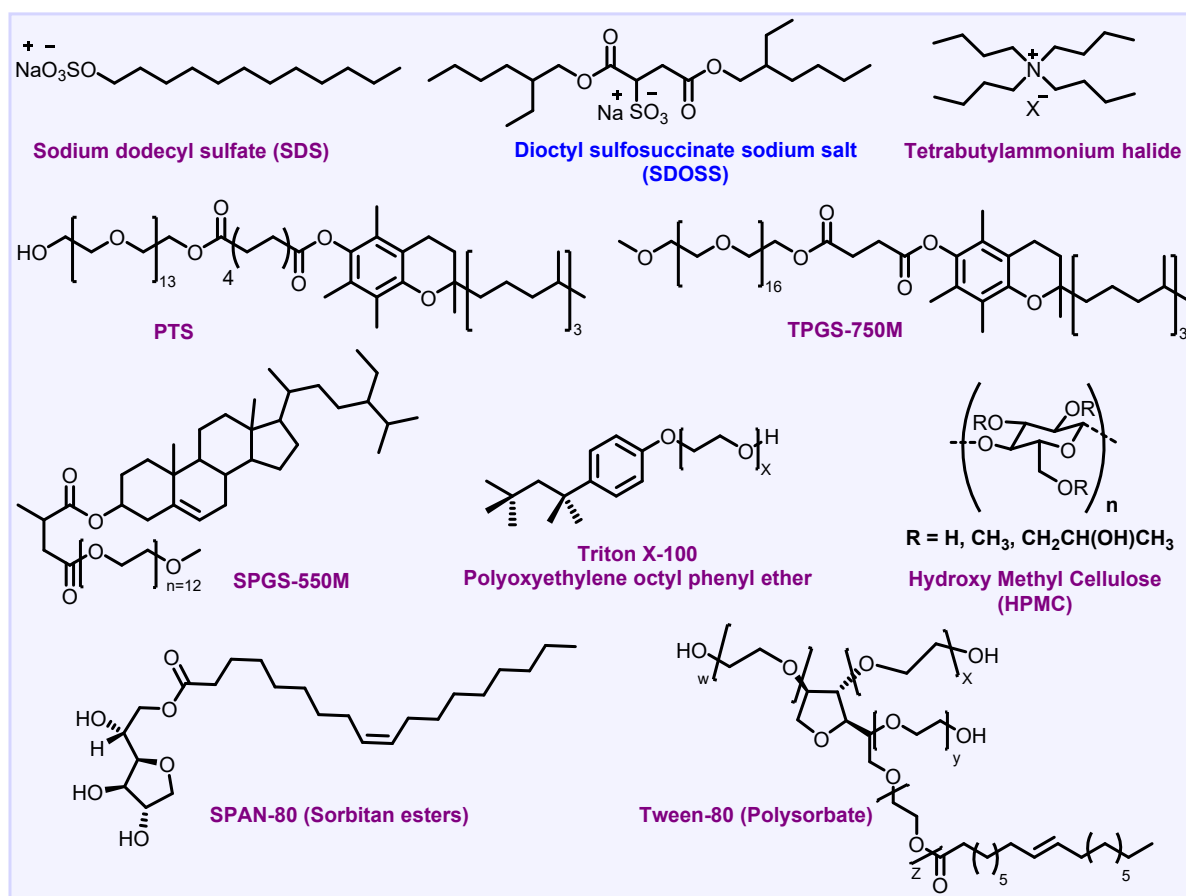

Figure S1. List of Surfactant

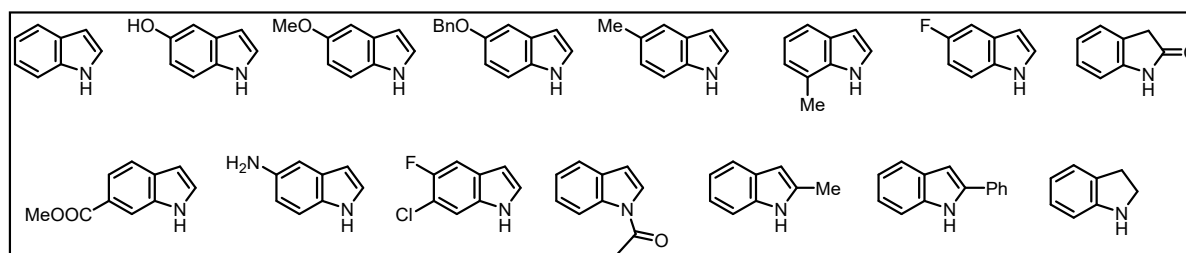

Figure S2. List of indoles

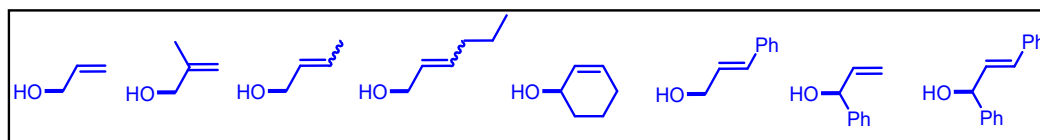

Figure S3. List of Allylic Alcohols

### 3. Synthesis of authentic samples (Standard reference for GC-MS studies)

#### 3.1. Synthesis of 3-Allyl-1H-indole (3a)<sup>1</sup>:

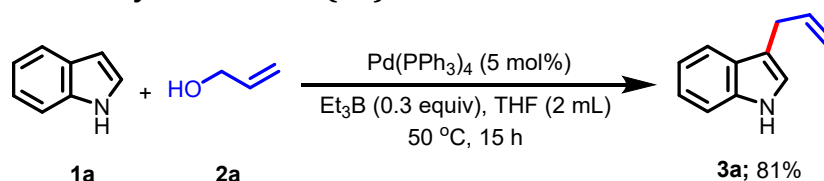

To a well cleaned tube equipped with a stir bar, Pd(PPh<sub>3</sub>)<sub>4</sub> (57.8 mg, 0.05 mmol, 5 mol%), indole **1a** (117.1 mg, 1 mmol), followed by successive addition of THF (2 mL), allyl alcohol **2a** (87.12 mg, 102  $\mu$ L, 1.5 mmol, 1.5 equiv), Et<sub>3</sub>B (0.3 mL of 1 M hexane solution, 0.3 mmol) via syringe. The resultant mixture was stirred 50 °C for 15 h. The reaction mixture was diluted with EtOAc and vortexed the resultant mixture. Final washing was done with sat. NaHCO<sub>3</sub> and with brine. The recovered organic layer was dried over anhyd. Na<sub>2</sub>SO<sub>4</sub> and concentrated under reduced pressure. The crude products were adsorbed on silica gel and pass through the column (R<sub>f</sub> = 0.47; EtOAc:Hexane = 1:10, v/v) to get analytically pure product **3a** (127.3 mg, 81%) as pale yellow liquid; <sup>1</sup>H NMR (500 MHz, CDCl<sub>3</sub>):  $\delta$  7.94 (s, 1H), 7.66 (d, *J* = 7.9 Hz, 1H), 7.39 (dt, *J* = 8.2, 0.9 Hz, 1H), 7.26 – 7.23 (m, 1H), 7.19 – 7.15 (m, 1H), 7.02 (s, 1H), 6.13 (ddt, *J* = 16.6, 10.0, 6.5 Hz, 1H), 5.22 (dq, *J* = 17.0, 1.7 Hz, 1H), 5.13 (dq, *J* = 10.0, 1.5 Hz, 1H), 3.58 (dq, *J* = 6.5, 1.3 Hz, 2H); <sup>13</sup>C NMR (125 MHz, CDCl<sub>3</sub>):  $\delta$  137.3, 136.4, 127.4, 122.0, 121.6, 119.2, 119.1, 115.2, 114.5, 111.0, 29.8; HRMS (ESI-TOF) *m/z*: [M + H]<sup>+</sup> Calculated for C<sub>11</sub>H<sub>12</sub>N<sup>+</sup> 158.0964, Found 158.0968.

#### 3.2. Synthesis of 1-Allyl-1H-indole (3b)<sup>2</sup>:

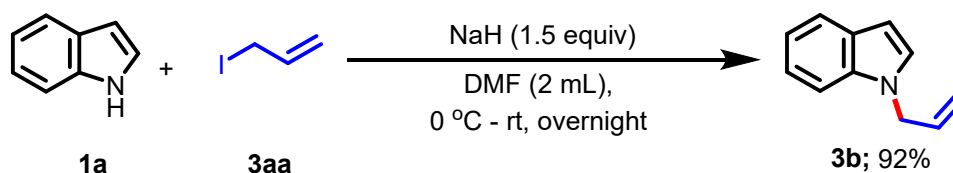

To a well cleaned tube equipped with a stir bar containing DMF (2 mL) solution of indole (117.15 mg, 1 mmol) was added NaH (60% dispersion in mineral oil, 60 mg, 1.5 mmol, 1.5 equiv) at 0 °C. The reaction mixture was allowed to stirred at the same temperature for 20 min, followed by addition of allyl iodide (251.97 mg, 137.2  $\mu$ L, 7.5 mmol, 1.5 equiv). The reaction mixture was stirred at room temperature until consumption of starting material (detected by TLC). The reaction mixture was quenched with ammonium chloride solution and diluted with EtOAc. Final washing was done with brine. The recovered organic layer was dried over anhyd. Na<sub>2</sub>SO<sub>4</sub> and concentrated under reduced pressure. The crude products were adsorbed on silica gel and pass through the column (EtOAc:Hexane = 1:20, v/v) The recovered organic layer was dried

<sup>1</sup>J. Am. Chem. Soc. **2005**, *127*, 4592-4593; <sup>2</sup>Org. Lett. **2019**, *21*, 3067-3071.

over anhyd. Na<sub>2</sub>SO<sub>4</sub> and concentrated under reduced pressure. The crude products were

adsorbed on silica gel and pass through the column (EtOAc:Hexane = 1:20, v/v) to get analytically pure product **3b** (144.63 mg, 92%) as orange liquid; <sup>1</sup>H NMR (500 MHz, CDCl<sub>3</sub>): δ 7.67 (d, *J* = 7.8 Hz, 1H), 7.36 (d, *J* = 8.2 Hz, 1H), 7.26 – 7.21 (m, 1H), 7.17 – 7.12 (m, 2H), 6.56 (d, *J* = 3.2 Hz, 1H), 6.08 – 5.99 (m, 1H), 5.23 (dt, *J* = 10.3, 1.5 Hz, 1H), 5.12 (dt, *J* = 17.1, 1.5 Hz, 1H), 4.80 – 4.75 (m, 2H); <sup>13</sup>C NMR (125 MHz, CDCl<sub>3</sub>): δ 136.1, 133.5, 128.7, 127.8, 121.5, 121.0, 119.4, 117.3, 109.6, 101.4, 48.9; HRMS (ESI-TOF) *m/z*: [M + H]<sup>+</sup> Calculated for C<sub>11</sub>H<sub>12</sub>N<sup>+</sup> 158.0964, Found 158.0970.

### 3.3 Synthesis of 1,3-Diallyl-1*H*-indole (**3c**)<sup>2</sup>:

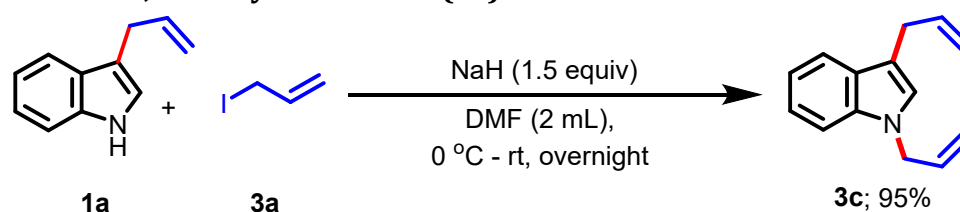

To a well cleaned tube equipped with a stir bar containing DMF (1 mL) solution of indole (157.21 mg, 1 mmol) was added NaH (60% dispersion in mineral oil, 60 mg, 1.5 mmol, 1.5 equiv) at 0 °C. The reaction mixture was allowed to stirred at the same temperature for 20 min, followed by addition of allyl iodide (251.97 mg, 137.2 μL, 7.5 mmol, 1.5 equiv). The reaction mixture was stirred at room temperature until complete consumption of starting material (detected by TLC). The reaction mixture was quenched with ammonium chloride solution and diluted with EtOAc. Final washing was done with brine. The recovered organic layer was dried over anhyd. Na<sub>2</sub>SO<sub>4</sub> and concentrated under reduced pressure. The crude products were adsorbed on silica gel and pass through the column (EtOAc:Hexane = 1:20, v/v) The recovered organic layer was dried over anhyd. Na<sub>2</sub>SO<sub>4</sub> and concentrated under reduced pressure. The crude products were adsorbed on silica gel and pass through the column (EtOAc:Hexane = 1:20, v/v) to get analytically pure product **3b** (187.4 mg, 95%) as orange liquid; <sup>1</sup>H NMR (500 MHz, CDCl<sub>3</sub>): δ 7.59 (dd, *J* = 8.0, 1.0 Hz, 1H), 7.31 – 7.27 (m, 1H), 7.19 (ddd, *J* = 8.2, 6.9, 1.2 Hz, 1H), 7.09 (ddd, *J* = 7.9, 6.8, 1.0 Hz, 1H), 6.88 (s, 1H), 6.11 – 5.93 (m, 2H), 5.21 – 5.03 (m, 4H), 4.67 (dt, *J* = 5.4, 1.7 Hz, 2H), 3.52 (dq, *J* = 6.5, 1.4 Hz, 2H).; <sup>13</sup>C NMR (125 MHz, CDCl<sub>3</sub>): δ 137.4, 136.6, 133.7, 128.0, 125.4, 121.6, 119.2, 118.8, 117.1, 115.1, 113.3, 109.5, 48.7, 29.8; HRMS (ESI-TOF) *m/z*: [M + H]<sup>+</sup> Calculated for C<sub>14</sub>H<sub>16</sub>N<sup>+</sup> 198.1277, Found 198.1280.

<sup>2</sup>Org. Lett. 2019, 21, 3067-3071.

## 4. GC-MS studies

### Sample preparation:

Reactions were kept on 0.2 mmole scale and after 18 h, 500  $\mu$ L of EtOAc was added and vigorously vortex. The biphasic layers were allowed to separate. From the upper organic layer, 20  $\mu$ L containing reaction mixture was pipetted out and mixed with 1 mL of LC-MS grade methanol. The solution was vortexed for uniformity and then filtered through Fluoropore Membrane Filter (MF-Millipore™, 0.22  $\mu$ m pore size, hydrophobic PTFE, 47 mm membrane). The filtrate collected was transferred into 1.5 ml GC-glass vial and was analyzed on the developed method. The blank vial containing LC-MS grade methanol was filtered in similar manner before injecting.

### Method development:

The method development was done using GC-MS (Agilent Technologies; see General Methods) by optimising the critical parameter such as detector, column, carrier gas, chromatographic conditions and mass specifications which are discussed below.

1. Injection/Inlet conditions: SSL (Split Splitless) was selected with Split ratio: 20:1. The sample was passed through injector temperature (Heater temperature) 250 °C with help of helium (He) carrier gas having gas flow of 1 mL/ min.
2. Selection of column: Agilent 19091S-433UI: 0602217H. Dimensions (30m x 250  $\mu$ m x 0.25  $\mu$ m) containing (5%-phenyl)-methylpolysiloxane column was used. The oven condition is as below:

|         | Rate<br>(°C/ min) | Value<br>(°C) | Hold time<br>(Min) | Run<br>Time<br>(Min) |
|---------|-------------------|---------------|--------------------|----------------------|
| Initial | -                 | 50            | 2                  | 2                    |
| Ramp 1  | 35                | 200           | 3                  | 9.2857               |
| Ramp 2  | 20                | 225           | 1                  | 11.536               |

Total program time 11.536 min; Post run: 2 min at 260 °C was done to remove any impurities from the column with high boiling point.

Aux Heater: MSD Transfer line Temperature: 270 °C was kept.

3. Detector: FID (Flame Ionization Detector) was utilized with H<sub>2</sub>: Air (1:10) as ignition fuel
4. Mass Parameter:  
Electron energy: 70 eV  
Source Temperature: 260 °C  
Scan Type: MS1 scan  
Solvent delay: 1.5 min  
Scanning mass range: 30-400 m/z
5. Data Acquisition/Interpretation: Agilent qualitative analysis Mass Hunter 10.0 was used



# Chromatogram:

## Chromatogram Plot Report

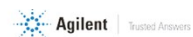

|                |                 |              |                                     |            |        |                   |                                 |
|----------------|-----------------|--------------|-------------------------------------|------------|--------|-------------------|---------------------------------|
| Name           | Std_mix_FINAL   | Rack Pos.    |                                     | Instrument | GCMSMS | Operator          | DESKTOP-BV6S52K\NIPER           |
| Inj. Vol. (ul) | 0.2             | Plate Pos.   |                                     | IRM Status |        | Acq. Time (Local) | 29-06-2021 16:07:52 (UTC+05:30) |
| Data File      | MCGNVS40668 1.D | Method (Acq) | 29-06-2021_indole_optimisation MS.M | Comment    |        |                   |                                 |

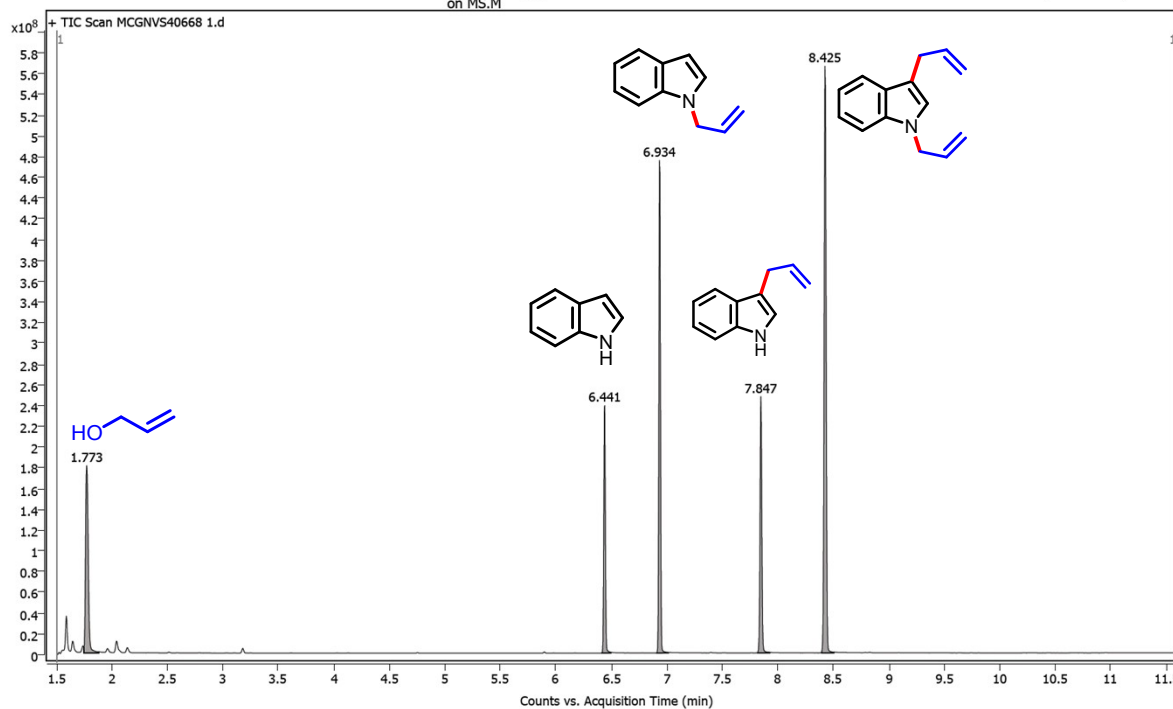

**Figure S4. Representative chromatograms with developed method on GC-MS having all the desired peak with their retention time (physical mixture of individual standards)**

# Chromatogram Plot Report

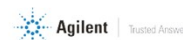

|                |                        |              |                                         |            |        |                   |                                    |
|----------------|------------------------|--------------|-----------------------------------------|------------|--------|-------------------|------------------------------------|
| Name           | Allyl alcohol_pure_std | Rack Pos.    |                                         | Instrument | GCMSMS | Operator          | DESKTOP-BV6S52K\NIPER              |
| Inj. Vol. (ul) | 0.2                    | Plate Pos.   |                                         | IRM Status |        |                   |                                    |
| Data File      | MCGNVS40664.D          | Method (Acq) | 29-06-2021_indole_optimisati<br>on MS.M | Comment    |        | Acq. Time (Local) | 29-06-2021 14:56:27<br>(UTC+05:30) |

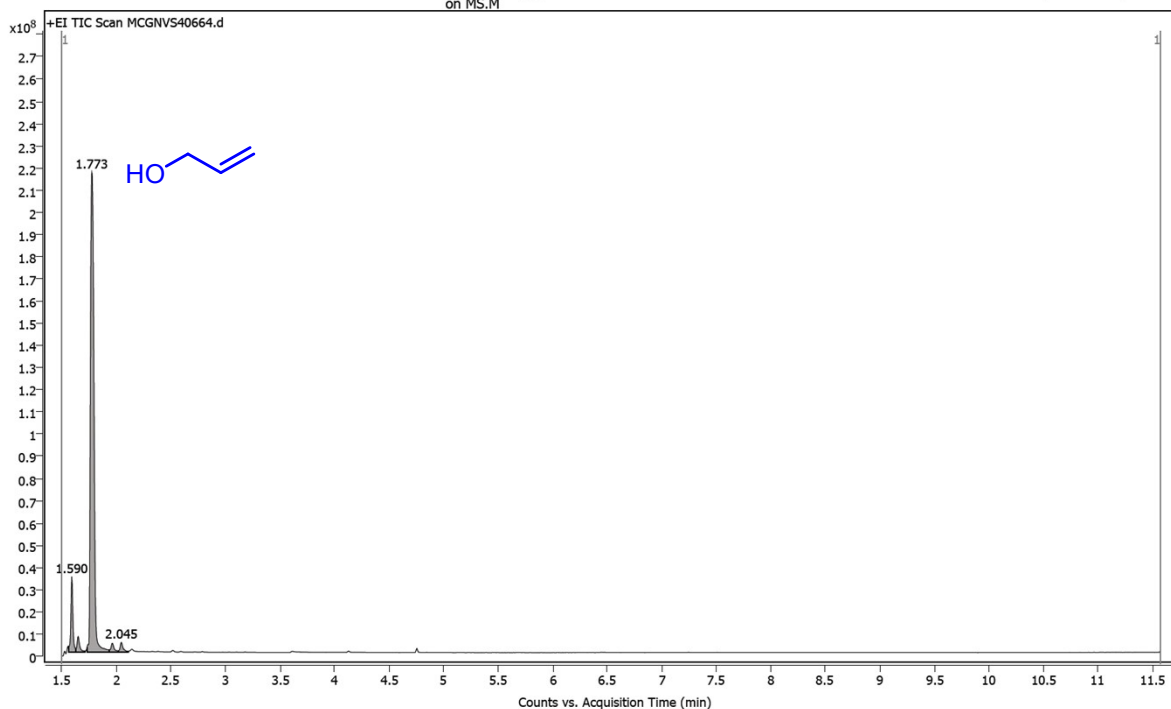

**Figure S5. Chromatogram with the retention time of allyl alcohol (2a)**

|                |                        |              |                                         |            |        |                   |                                    |
|----------------|------------------------|--------------|-----------------------------------------|------------|--------|-------------------|------------------------------------|
| Name           | Allyl alcohol_pure_std | Rack Pos.    |                                         | Instrument | GCMSMS | Operator          | DESKTOP-BV6S52K\NIPER              |
| Inj. Vol. (ul) | 0.2                    | Plate Pos.   |                                         | IRM Status |        |                   |                                    |
| Data File      | MCGNVS40664.D          | Method (Acq) | 29-06-2021_indole_optimisati<br>on MS.M | Comment    |        | Acq. Time (Local) | 29-06-2021 14:56:27<br>(UTC+05:30) |

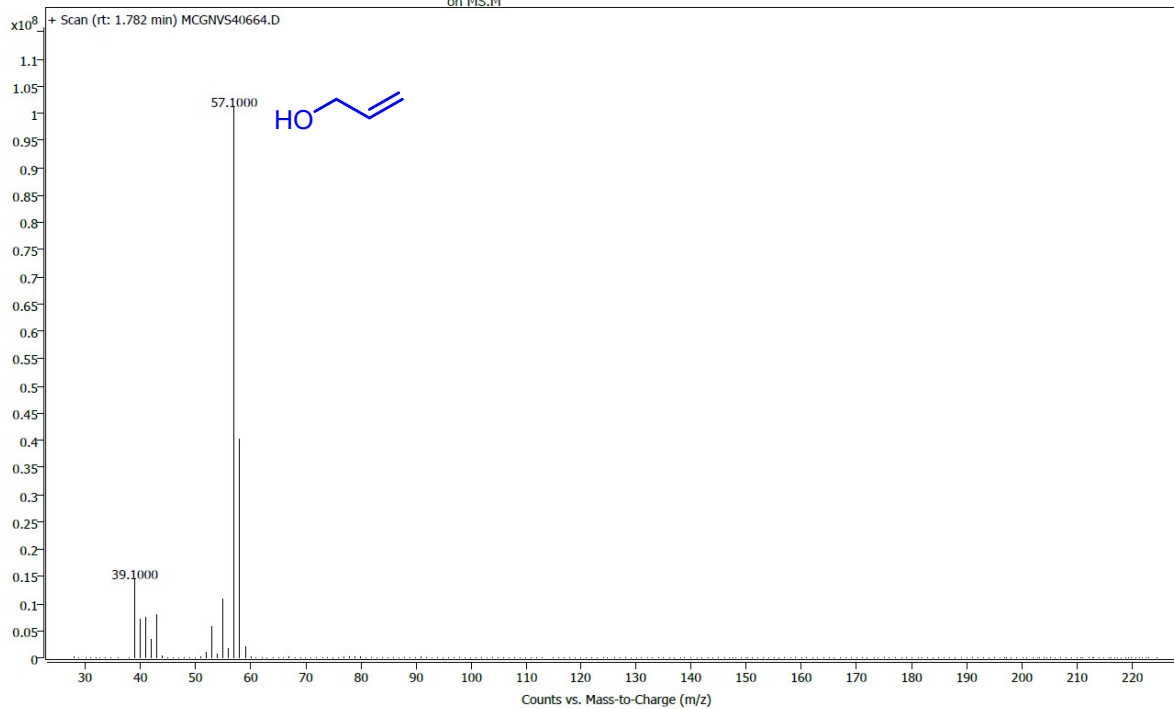

**Figure S6. Mass spectra of allyl alcohol (2a)**

## Chromatogram Plot Report

Agilent | Trusted Answers

|                |                 |              |                                      |         |                   |                                 |
|----------------|-----------------|--------------|--------------------------------------|---------|-------------------|---------------------------------|
| Name           | Indole_pure_std | Rack Pos.    | Instrument                           | GCMSMS  | Operator          | DESKTOP-BV6S52K\NIPER           |
| Inj. Vol. (ul) | 0.2             | Plate Pos.   | IRM Status                           |         | Acq. Time (Local) | 29-06-2021 14:38:36 (UTC+05:30) |
| Data File      | MCGNVS40663.D   | Method (Acq) | 29-06-2021_indole_optimisati on MS.M | Comment |                   |                                 |

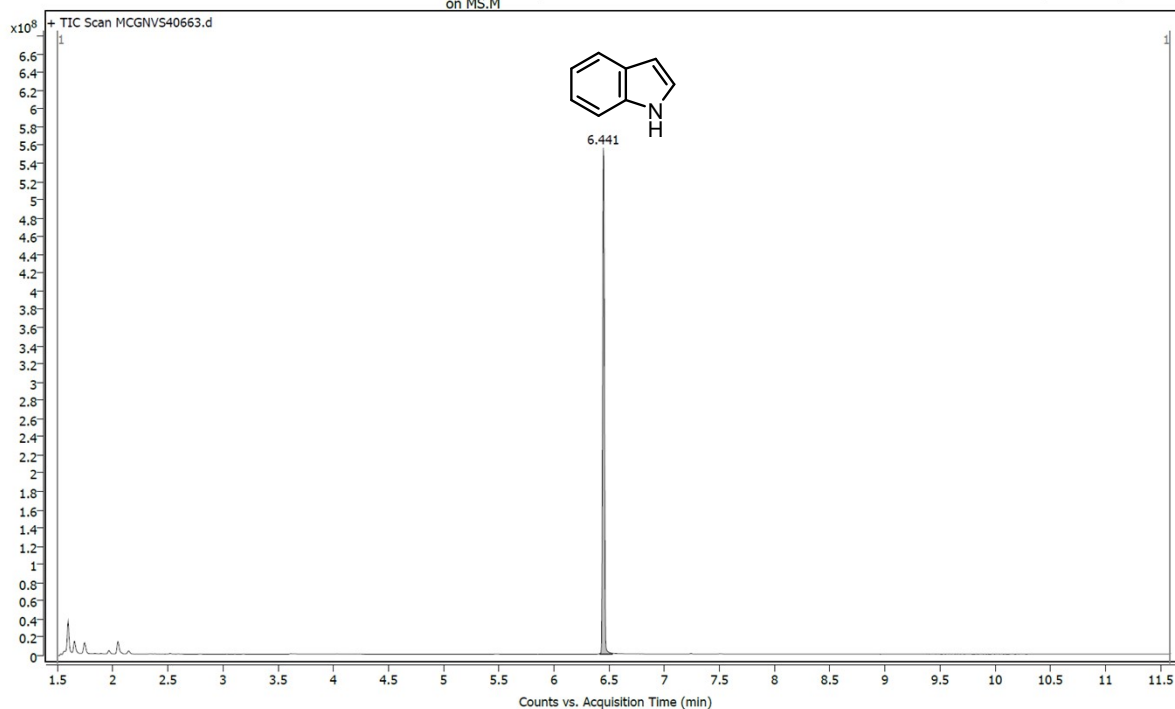

**Figure S7. Chromatogram with the retention time of allyl alcohol (1a)**

## Spectrum Plot Report

Agilent | Trusted Answers

|                |                 |              |                                      |         |                   |                                 |
|----------------|-----------------|--------------|--------------------------------------|---------|-------------------|---------------------------------|
| Name           | Indole_pure_std | Rack Pos.    | Instrument                           | GCMSMS  | Operator          | DESKTOP-BV6S52K\NIPER           |
| Inj. Vol. (ul) | 0.2             | Plate Pos.   | IRM Status                           |         | Acq. Time (Local) | 29-06-2021 14:38:36 (UTC+05:30) |
| Data File      | MCGNVS40663.D   | Method (Acq) | 29-06-2021_indole_optimisati on MS.M | Comment |                   |                                 |

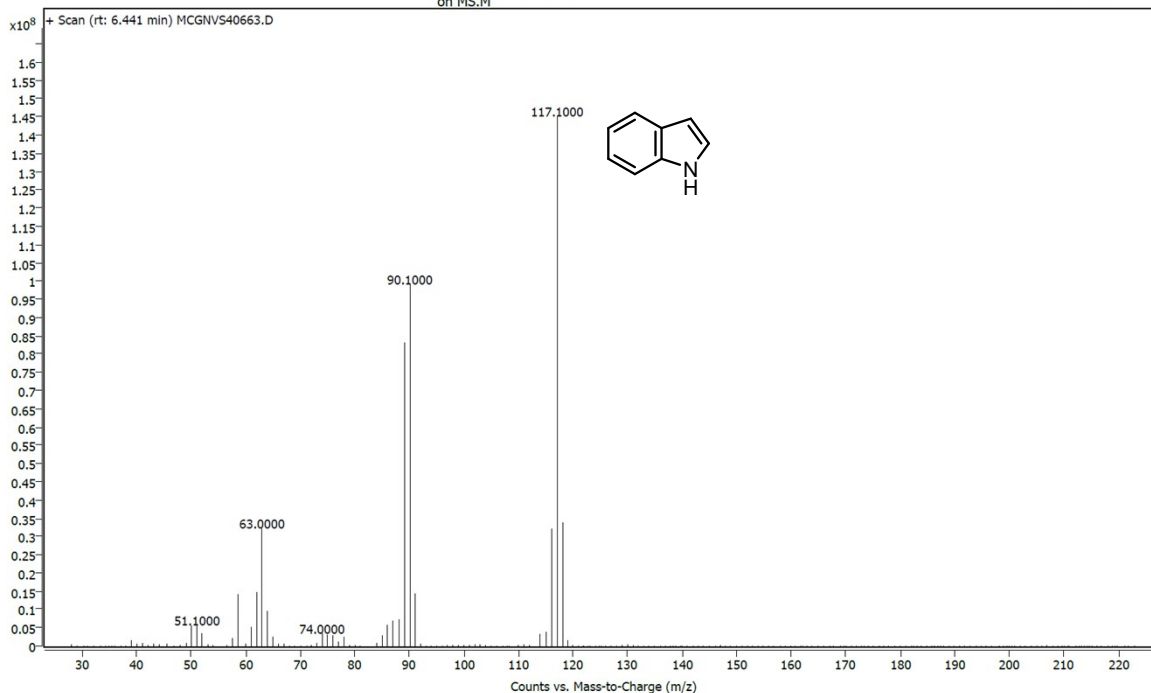

**Figure S8. Mass spectra of indole (1a)**

## Chromatogram Plot Report

Agilent | Trusted Answers

|                |                             |              |                                             |         |                   |                                    |
|----------------|-----------------------------|--------------|---------------------------------------------|---------|-------------------|------------------------------------|
| Name           | c3-allyl<br>indole_pure_std | Rack Pos.    | Instrument                                  | GCMSMS  | Operator          | DESKTOP-<br>BV6S52K\NIPER          |
| Inj. Vol. (ul) | 0.2                         | Plate Pos.   | IRM Status                                  |         |                   |                                    |
| Data File      | MCGNVS40667.D               | Method (Acq) | 29-06-<br>2021_indole_optimisati<br>on MS.M | Comment | Acq. Time (Local) | 29-06-2021 15:50:00<br>(UTC+05:30) |

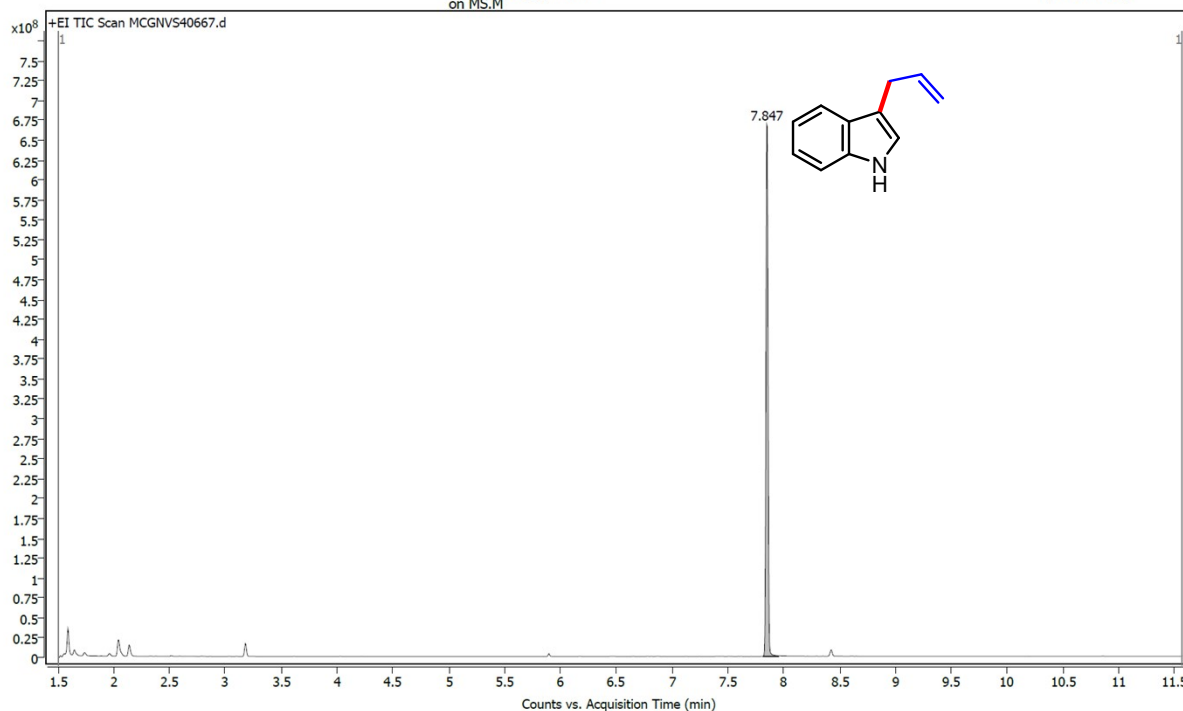

**Figure S9. Chromatogram with the retention time of 3-Allyl-1H-indole (3a)**

## Spectrum Plot Report

Agilent | Trusted Answers

|                |                             |              |                                             |         |                   |                                    |
|----------------|-----------------------------|--------------|---------------------------------------------|---------|-------------------|------------------------------------|
| Name           | c3-allyl<br>indole_pure_std | Rack Pos.    | Instrument                                  | GCMSMS  | Operator          | DESKTOP-<br>BV6S52K\NIPER          |
| Inj. Vol. (ul) | 0.2                         | Plate Pos.   | IRM Status                                  |         |                   |                                    |
| Data File      | MCGNVS40667.D               | Method (Acq) | 29-06-<br>2021_indole_optimisati<br>on MS.M | Comment | Acq. Time (Local) | 29-06-2021 15:50:00<br>(UTC+05:30) |

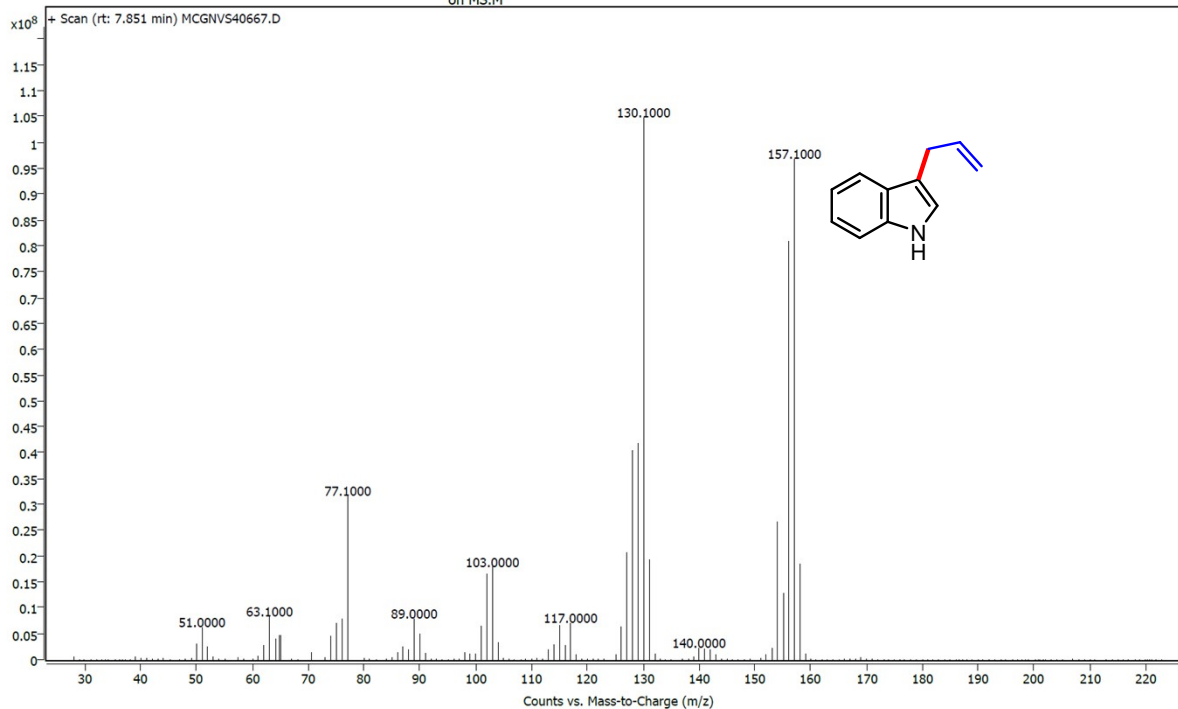

**Figure S10. Mass spectra of 3-Allyl-1H-indole (3a)**

## Chromatogram Plot Report

|                |                                   |              |                                      |                   |                                 |
|----------------|-----------------------------------|--------------|--------------------------------------|-------------------|---------------------------------|
| Name           | N-allyl indole_pure_std Rack Pos. | Instrument   | GCMSMS                               | Operator          | DESKTOP-BV6S52K\NIPER           |
| Inj. Vol. (ul) | 0.2                               | IRM Status   |                                      | Acq. Time (Local) | 29-06-2021 15:14:18 (UTC+05:30) |
| Data File      | MCGNVS40665.D                     | Method (Acq) | 29-06-2021_indole_optimisati on MS.M | Comment           |                                 |

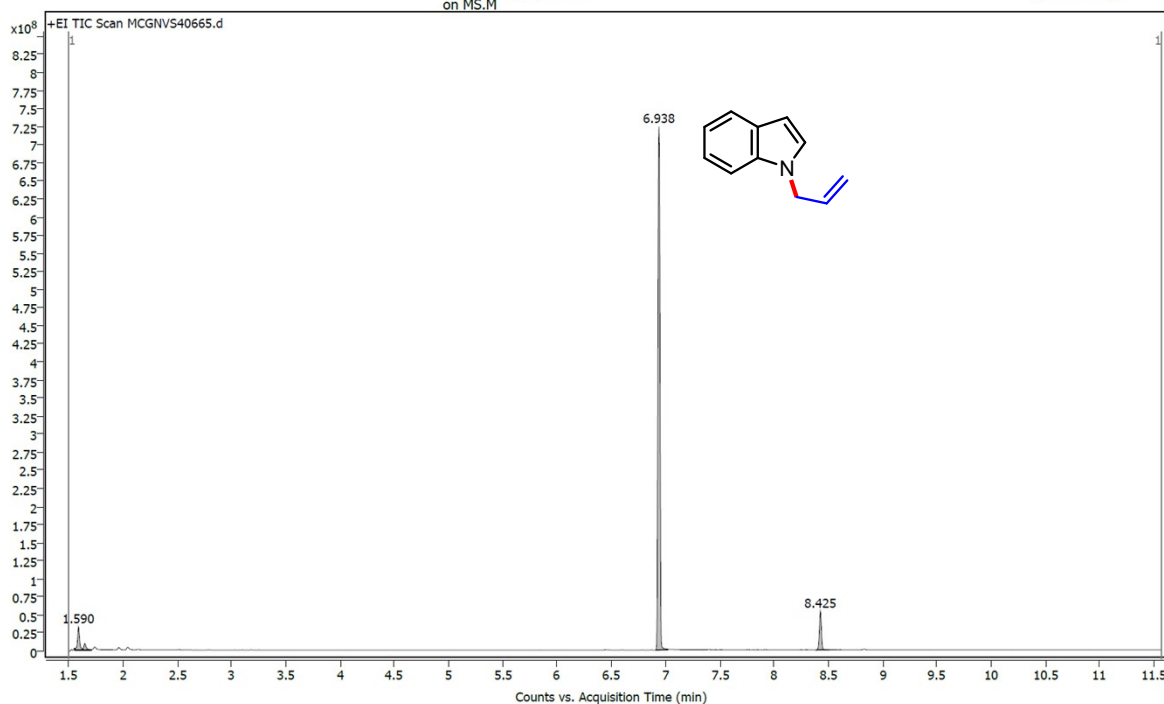

**Figure S11. Chromatogram with the retention time of 1-Allyl-1H-indole (3b)**

## Spectrum Plot Report

|                |                                   |              |                                      |                   |                                 |
|----------------|-----------------------------------|--------------|--------------------------------------|-------------------|---------------------------------|
| Name           | N-allyl indole_pure_std Rack Pos. | Instrument   | GCMSMS                               | Operator          | DESKTOP-BV6S52K\NIPER           |
| Inj. Vol. (ul) | 0.2                               | IRM Status   |                                      | Acq. Time (Local) | 29-06-2021 15:14:18 (UTC+05:30) |
| Data File      | MCGNVS40665.D                     | Method (Acq) | 29-06-2021_indole_optimisati on MS.M | Comment           |                                 |

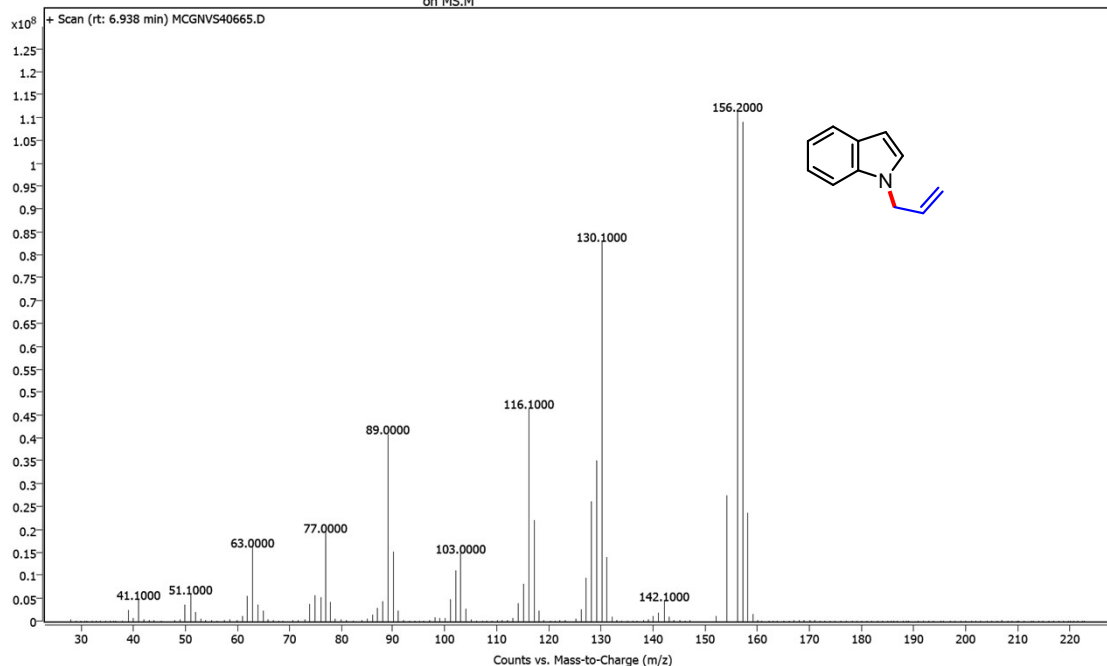

**Figure S12. Mass spectra of 1-Allyl-1H-indole (3b)**

## Chromatogram Plot Report

|                |                           |              |                                      |         |                   |                                 |
|----------------|---------------------------|--------------|--------------------------------------|---------|-------------------|---------------------------------|
| Name           | Bis-allyl indole_pure_std | Rack Pos.    | Instrument                           | GCMSMS  | Operator          | DESKTOP-BV6S52K\NIPER           |
| Inj. Vol. (ul) | 0.2                       | Plate Pos.   | IRM Status                           |         |                   |                                 |
| Data File      | MCGNVS40666.D             | Method (Acq) | 29-06-2021_indole_optimisati on MS.M | Comment | Acq. Time (Local) | 29-06-2021 15:32:08 (UTC+05:30) |

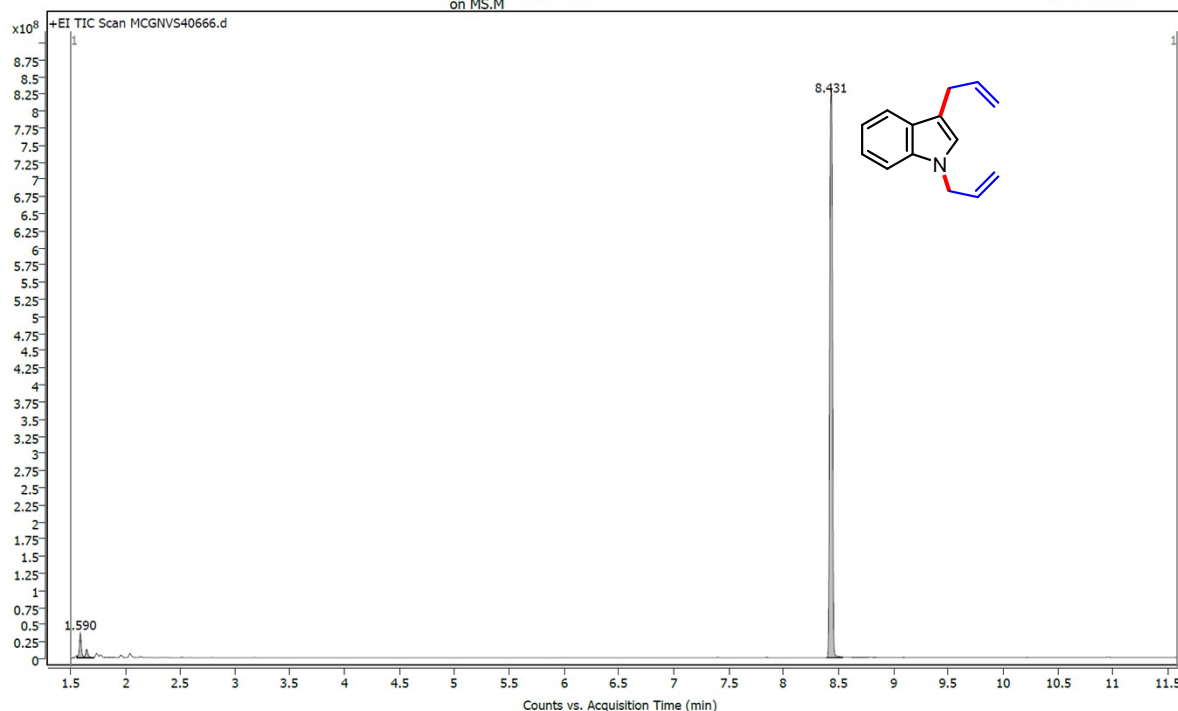

**Figure S13. Chromatogram with the retention time of 1,3-Diallyl-1H-indole (3c)**

## Spectrum Plot Report

|                |                           |              |                                      |         |                   |                                 |
|----------------|---------------------------|--------------|--------------------------------------|---------|-------------------|---------------------------------|
| Name           | Bis-allyl indole_pure_std | Rack Pos.    | Instrument                           | GCMSMS  | Operator          | DESKTOP-BV6S52K\NIPER           |
| Inj. Vol. (ul) | 0.2                       | Plate Pos.   | IRM Status                           |         |                   |                                 |
| Data File      | MCGNVS40666.D             | Method (Acq) | 29-06-2021_indole_optimisati on MS.M | Comment | Acq. Time (Local) | 29-06-2021 15:32:08 (UTC+05:30) |

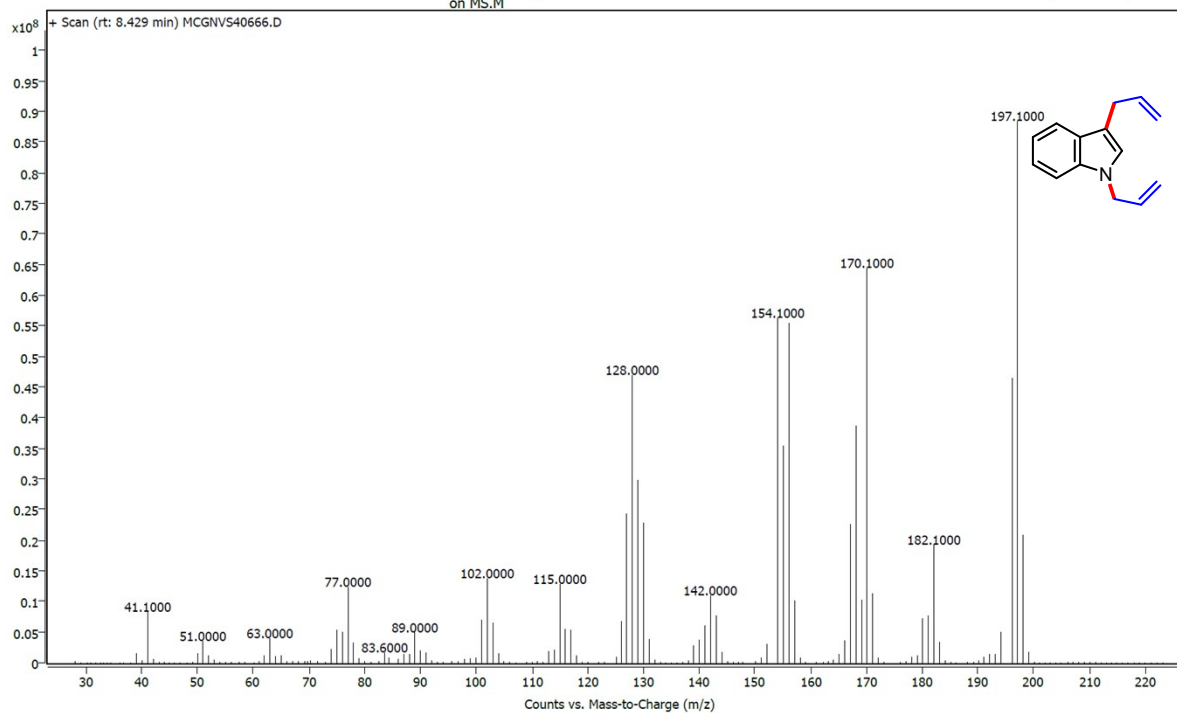

**Figure S14. Mass spectra of 1,3-Diallyl-1H-indole (3c)**

## 5. Zeta-sizer study: Average micellar size for different surfactants

Average particle size and Particle Distribution Index (**PDI**, a representation of the distribution of size populations within a given sample) of the reaction mixture containing the micellar solution was determined using the Zetasizer (See, General Methods)

### Sample preparation:

About 0.5 mL of freshly prepared aqueous solutions (2% w/w) of different surfactants were pipetted out and diluted one time (1x) with miliQ water in microcentrifuge tube. This was further filtered through Fluoropore Membrane Filter (MF-Millipore™, 0.22 μm pore size, hydrophobic PTFE, 47 mm membrane). The filtrate collected were used as final sample. All the sample measurements were made at 25 ± 2 °C in triplicate using disposable cuvette, and the results were analyzed using Zetasizer 633 nm and angle (173°).

**Table S1. Particle size distribution (PSD) of various surfactants (2% w/w)**

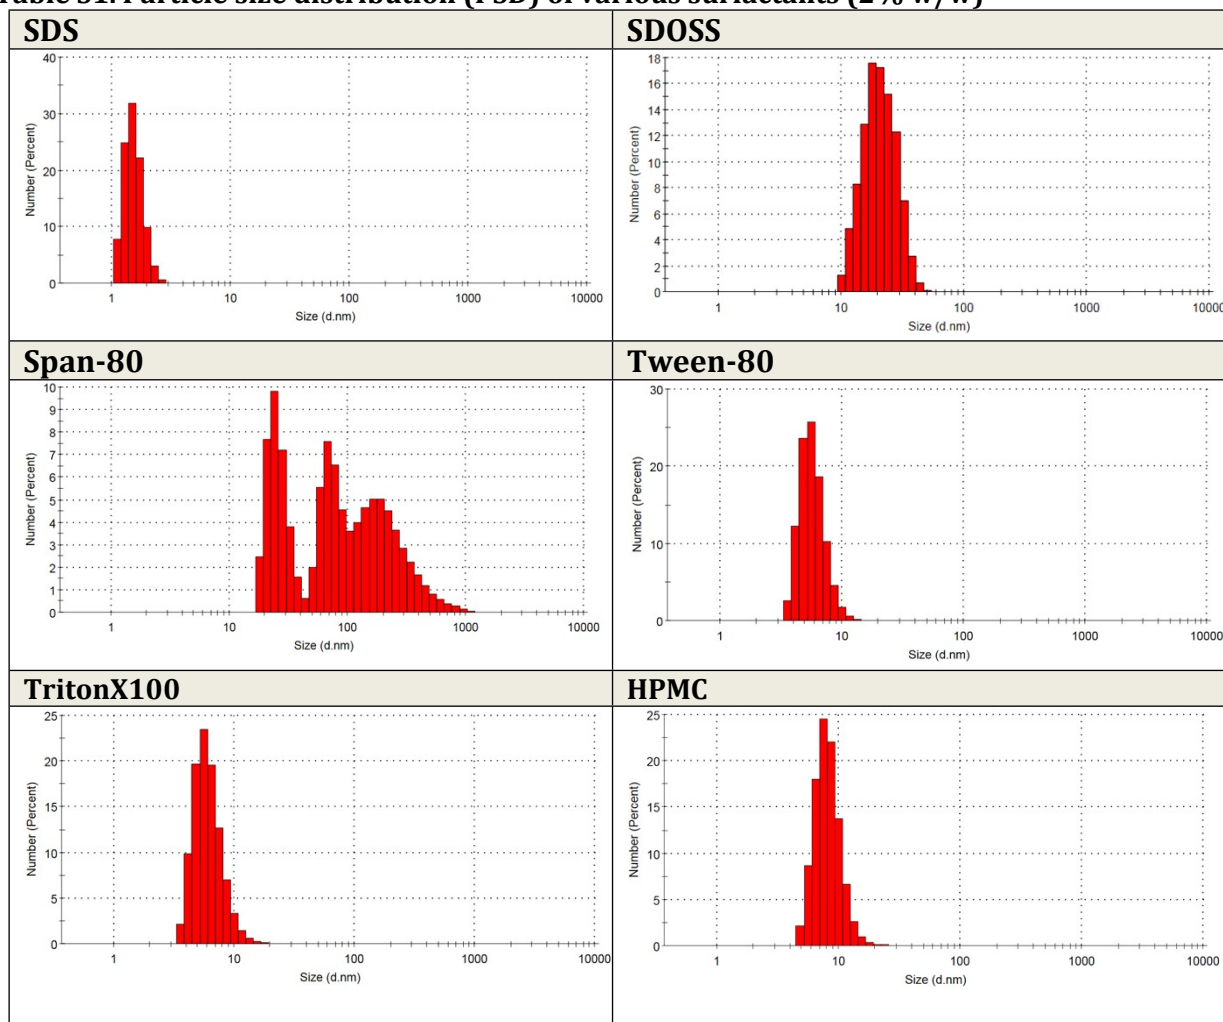

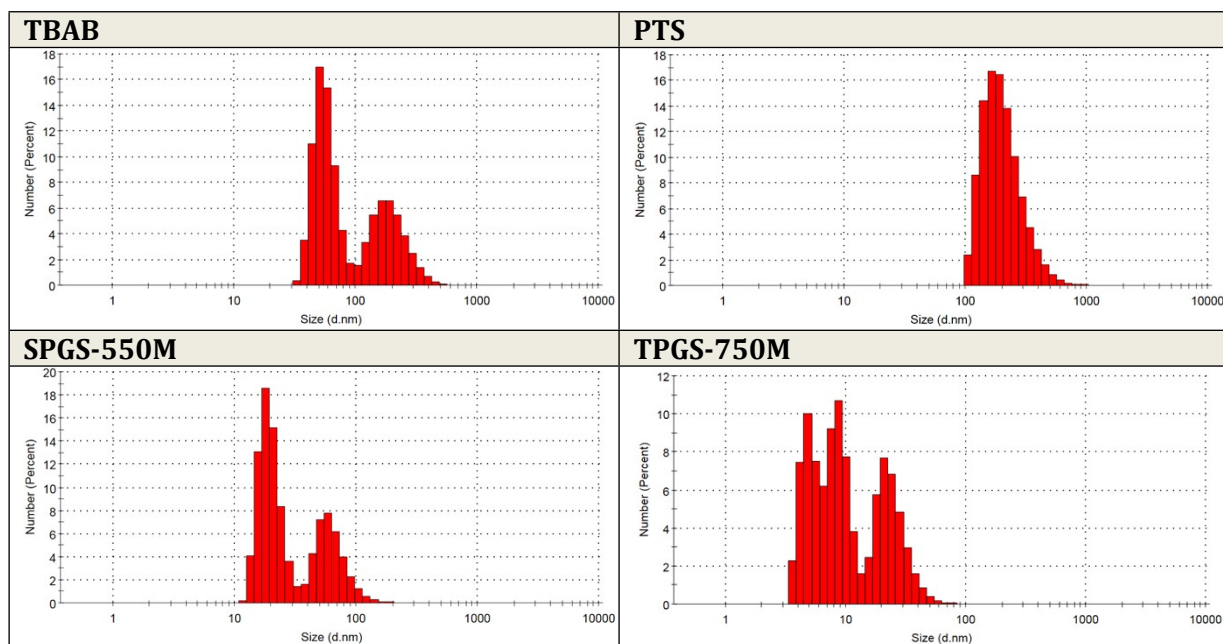

## 6. Effect of SDOSS concentration

**Table S2: Concentration-dependent SDOSS study.<sup>a</sup>**

| Entry | SDOSS<br>(w/w%) | Av. Micellar size <sup>b</sup><br>(nm) | Yield (%) <sup>c</sup><br><b>3a</b> |
|-------|-----------------|----------------------------------------|-------------------------------------|
| 1     | 1               | 809                                    | 63                                  |
| 2     | 2               | 402.0                                  | 98                                  |
| 3     | 4               | 2116                                   | 93                                  |
| 4     | 6               | 1136                                   | 74                                  |
| 5     | 8               | 1621                                   | 84                                  |

<sup>a</sup>**1a** (0.2 mmol) was treated with **2a** (0.3 mmol, 1.5 equiv) in different concentrations of Aq. SDOSS (% w/w) (0.5 mL) in presence of Ni(cod)<sub>2</sub> (10 mol%), PPh<sub>3</sub> (20 mol%) at 50 °C for 24 h. <sup>b</sup>Average micellar size (nm) was determined from three runs on zeta sizer. <sup>c</sup>GC-MS yields.



**Table S3. Particle size distribution (PSD) of SDOSS at different concentrations (% w/w)**

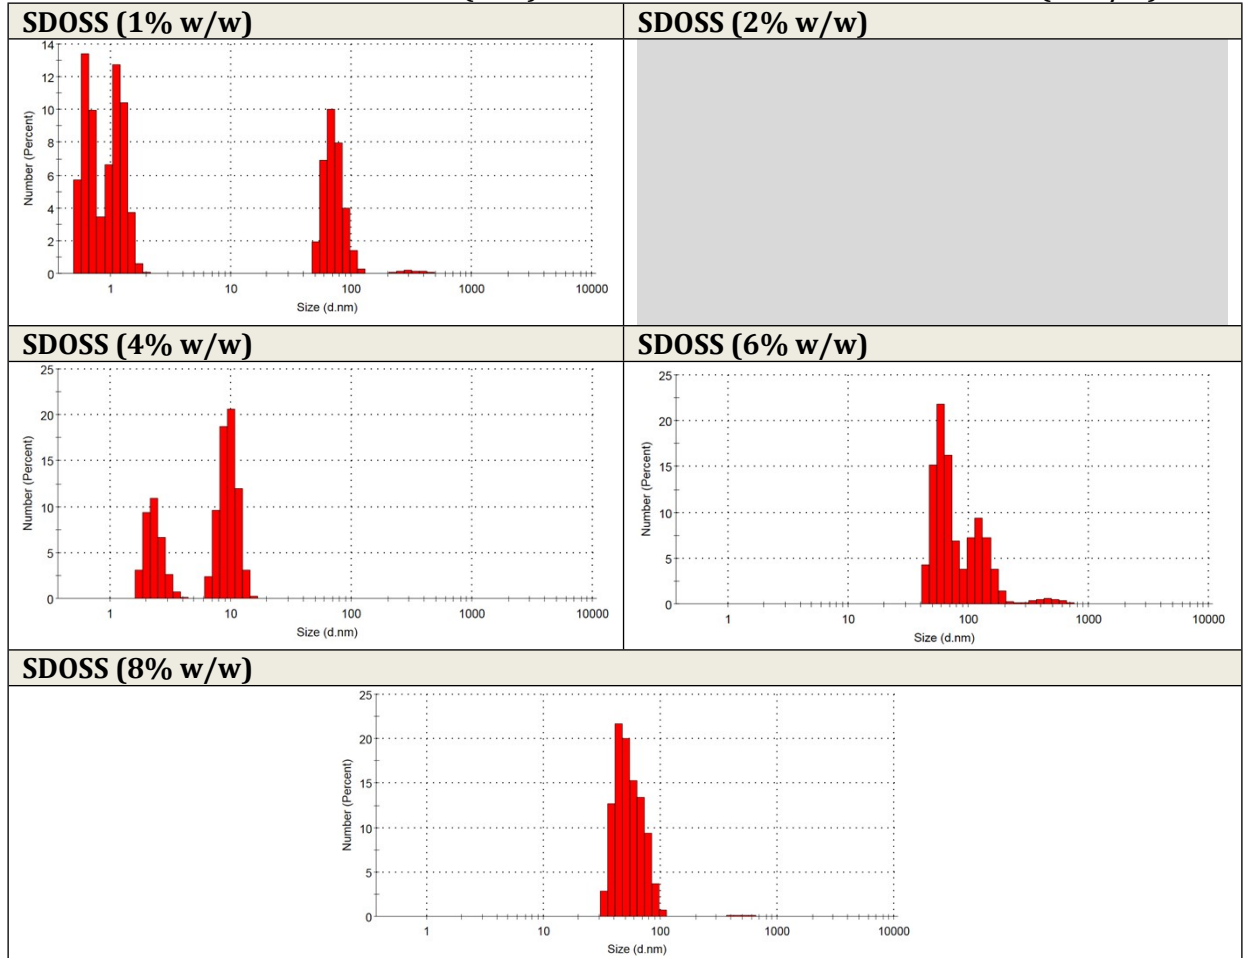

## 7. Optimization study

**Table S4. Optimization of reaction conditions.<sup>a</sup>**

C1=CC=C2C(=C1)C=CN2 + C=CCO  $\xrightarrow[\text{Aq. SDOSS (2\% w/w, 0.5 mL)}]{\text{Ni(cod)}_2 (x \text{ mol\%}), \text{PPh}_3 (y \text{ mol\%)}}$  C=CC1=CC=C2C(=C1)C=CN2

| Entry | Ni(cod) <sub>2</sub><br>(mol%) | PPh <sub>3</sub><br>(mol%) | Temperature<br>(°C) | Yield (%) <sup>b</sup><br><b>3a</b> |
|-------|--------------------------------|----------------------------|---------------------|-------------------------------------|
| 1     | 10                             | 20                         | 50                  | 98(86) <sup>c</sup>                 |
| 2     | 8                              | 20                         | 50                  | 84                                  |
| 3     | 7.5                            | 20                         | 50                  | 70                                  |
| 4     | 5                              | 20                         | 50                  | 49                                  |
| 5     | 10                             | 18                         | 50                  | 85                                  |
| 8     | 10                             | 16                         | 50                  | 72                                  |
| 9     | 10                             | 14                         | 50                  | 67                                  |
| 10    | 10                             | 12                         | 50                  | 62                                  |
| 11    | 10                             | 20                         | rt                  | traces <sup>d</sup>                 |

<sup>a</sup>**1a** (0.2 mmol) was treated with **2a** (0.3 mmol, 1.5 equiv) in Aq. SDOSS (2% w/w, 0.5 mL) in presence of Ni(cod)<sub>2</sub> – PPh<sub>3</sub> under different reaction conditions. <sup>b</sup>GC-MS yield of **3a**. <sup>c</sup>Isolated yield after 18 h.

## 8. Screening of Ni(II)-Catalyst for C<sub>3</sub>-allylation

Table S5. Screening Ni(II)-catalyst under optimized condition <sup>a</sup>

| 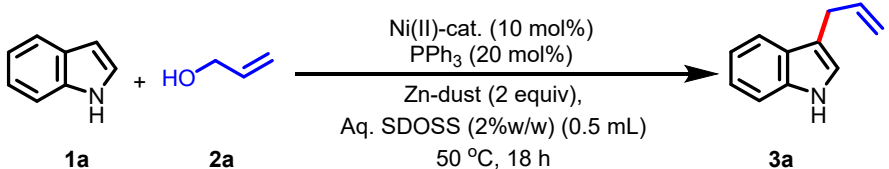 |                                                    |                        |
|------------------------------------------------------------------------------------|----------------------------------------------------|------------------------|
| Entry                                                                              | Ni(II)-cat.<br>(10 mol%)                           | Yield (%) <sup>b</sup> |
| 1                                                                                  | NiF <sub>2</sub>                                   | 0 <sup>c</sup>         |
| 2                                                                                  | NiCl <sub>2</sub>                                  | 0 <sup>c</sup>         |
| 3                                                                                  | NiBr <sub>2</sub>                                  | 0 <sup>c</sup>         |
| 4                                                                                  | NiI <sub>2</sub>                                   | 0 <sup>c</sup>         |
| 5                                                                                  | NiCl <sub>2</sub> glyme                            | 0 <sup>c</sup>         |
| 6                                                                                  | Ni(acac) <sub>2</sub>                              | 0 <sup>c</sup>         |
| 7                                                                                  | dppeNiCl <sub>2</sub>                              | 0 <sup>c</sup>         |
| 8                                                                                  | Ni(PPh <sub>3</sub> ) <sub>2</sub> Cl <sub>2</sub> | 0 <sup>c</sup>         |

<sup>a</sup>**1a** (0.2 mmol) was treated with **2a** (0.3 mmol, 1.5 equiv) in Aq. SDOSS (2% w/w, 0.5 mL) in presence of Ni(II)-cat (10 mol%), PPh<sub>3</sub> (20 mol%) and zinc dust (2 equiv) at 50 °C for 18 h. <sup>b</sup>GC-MS yield of **3a**. <sup>c</sup>**1a** remained intact.

**Table S6. Screening Ni(II)-catalyst under optimized condition at elevated temperature condition <sup>a</sup>**

$\text{1a} + \text{2a} \xrightarrow[\text{Aq. SDOSS (2\%w/w) (0.5 mL), 100 }^\circ\text{C, 18 h}]{\text{Ni(II)-cat. (10 mol\%), PPh}_3 \text{ (20 mol\%), Zn-dust (2 equiv)}} \text{3a}$

| Entry | Ni(II)-cat.<br>(10 mol%)                           | Yield (%) <sup>b</sup><br><b>3a</b> |
|-------|----------------------------------------------------|-------------------------------------|
| 1     | NiF <sub>2</sub>                                   | 0 <sup>c</sup>                      |
| 2     | NiCl <sub>2</sub>                                  | 0 <sup>c</sup>                      |
| 3     | NiBr <sub>2</sub>                                  | 0 <sup>c</sup>                      |
| 4     | NiI <sub>2</sub>                                   | 0 <sup>c</sup>                      |
| 5     | NiCl <sub>2</sub> glyme                            | 0 <sup>c</sup>                      |
| 6     | Ni(acac) <sub>2</sub>                              | 0 <sup>c</sup>                      |
| 7     | dppeNiCl <sub>2</sub>                              | 0 <sup>c</sup>                      |
| 8     | Ni(PPh <sub>3</sub> ) <sub>2</sub> Cl <sub>2</sub> | 0 <sup>c</sup>                      |

<sup>a</sup>**1a** (0.2 mmol) was treated with **2a** (0.3 mmol, 1.5 equiv) in Aq. SDOSS (2% w/w, 0.5 mL) in presence of Ni(II)-cat (10 mol%), PPh<sub>3</sub> (20 mol%) and zinc dust (2 equiv) at 100 °C for 18 h. <sup>b</sup>GC-MS yield of **3a**. <sup>c</sup>**1a** remained intact.

**Table S7. Screening Ni(II)-catalyst under optimized condition in presence of TBAB<sup>a</sup>**

Reaction scheme: **1a** + **2a**  $\xrightarrow[\text{50 } ^\circ\text{C, 18 h}]{\text{Ni(II)-cat. (10 mol\%), PPh}_3 \text{ (20 mol\%), Zn-dust (2 equiv), TBAB (1 equiv), Aq. SDOSS (2\%w/w) (0.5 mL)}}$  **3a**

| Entry | Ni(II)-cat.<br>(10 mol%)                           | Yield (%) <sup>b</sup> |
|-------|----------------------------------------------------|------------------------|
| 1     | NiF <sub>2</sub>                                   | 0 <sup>c</sup>         |
| 2     | NiCl <sub>2</sub>                                  | 0 <sup>c</sup>         |
| 3     | NiBr <sub>2</sub>                                  | 0 <sup>c</sup>         |
| 4     | NiI <sub>2</sub>                                   | 0 <sup>c</sup>         |
| 5     | NiCl <sub>2</sub> glyme                            | 0 <sup>c</sup>         |
| 6     | Ni(acac) <sub>2</sub>                              | 0 <sup>c</sup>         |
| 7     | dppeNiCl <sub>2</sub>                              | 0 <sup>c</sup>         |
| 8     | Ni(PPh <sub>3</sub> ) <sub>2</sub> Cl <sub>2</sub> | 0 <sup>c</sup>         |

<sup>a</sup>**1a** (0.2 mmol) was treated with **2a** (0.3 mmol, 1.5 equiv) in Aq. SDOSS (2% w/w, 0.5 mL) in presence of Ni(II)-cat (10 mol%), PPh<sub>3</sub> (20 mol%), zinc dust (2 equiv) and TBAB (1 equiv) at 50 °C for 18 h. <sup>b</sup>GC-MS yield of **3a**. <sup>c</sup>**1a** remained intact.

**Table S8. Screening Ni(II)-catalyst under optimized condition at elevated temperature condition in presence of TBAB<sup>a</sup>**

$\text{1a} + \text{2a} \xrightarrow[\text{100 } ^\circ\text{C, 18 h}]{\text{Ni(II)-cat. (10 mol\%), PPh}_3 \text{ (20 mol\%), Zn-dust (2 equiv), TBAB (1 equiv), Aq. SDOSS (2\%w/w) (0.5 mL)}} \text{3a}$

| Entry | Ni(II)-cat.<br>(10 mol%)                           | Yield (%) <sup>b</sup><br><b>3a</b> |
|-------|----------------------------------------------------|-------------------------------------|
| 1     | NiF <sub>2</sub>                                   | 0 <sup>c</sup>                      |
| 2     | NiCl <sub>2</sub>                                  | 0 <sup>c</sup>                      |
| 3     | NiBr <sub>2</sub>                                  | 0 <sup>c</sup>                      |
| 4     | NiI <sub>2</sub>                                   | 0 <sup>c</sup>                      |
| 5     | NiCl <sub>2</sub> glyme                            | 0 <sup>c</sup>                      |
| 6     | Ni(acac) <sub>2</sub>                              | 0 <sup>c</sup>                      |
| 7     | dppeNiCl <sub>2</sub>                              | 0 <sup>c</sup>                      |
| 8     | Ni(PPh <sub>3</sub> ) <sub>2</sub> Cl <sub>2</sub> | 0 <sup>c</sup>                      |

<sup>a</sup>**1a** (0.2 mmol) was treated with **2a** (0.3 mmol, 1.5 equiv) in Aq. SDOSS (2% w/w, 0.5 mL) in presence of Ni(II)-cat (10 mol%), PPh<sub>3</sub> (20 mol%), zinc dust (2 equiv) and TBAB (1 equiv) at 100 °C for 18 h. <sup>b</sup>GC-MS yield of **3a**. <sup>c</sup>**1a** remained intact.

## 9. Representative experimental procedure

### General procedure for the *N*-allylation using allyl alcohols under aqueous micellar nickel-catalysis:

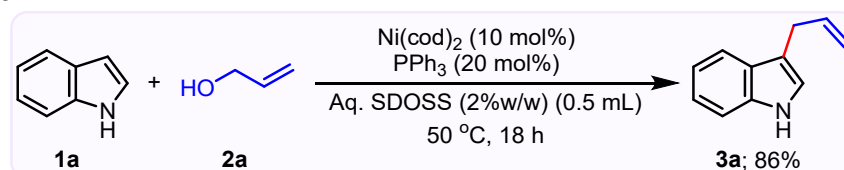

To a well cleaned tube equipped with a stir bar, Ni(cod)<sub>2</sub> (5.1 mg, 0.02 mmol, 10 mol%), PPh<sub>3</sub> (10.5 mg, 0.04 mmol, 20 mol%), indole **1a** (23.5 mg, 0.2 mmol), allyl alcohol **2a** (17.4 mg, 20.1  $\mu$ L, 0.3 mmol, 1.5 equiv), and Aq. SDOSS (2% w/w, 0.5 mL) were added. The resultant mixture was stirred at 50 °C for 18 h. The cooled (room temp.) reaction mixture was diluted with EtOAc (2 X 0.5 mL), vortexed and subjected to aqueous workup. Final washing was done using brine solution. The organic liquid containing product and other organic residue was removed carefully and was dried over anhyd. Na<sub>2</sub>SO<sub>4</sub> and concentrated under reduced pressure. The crude products were adsorbed on silica gel and pass through the column (*R<sub>f</sub>* = 0.47; EtOAc:Hexane = 1:10, v/v) to get analytically pure product **3a** as pale yellow liquid (27.0 mg, 86%); <sup>1</sup>H NMR (500 MHz, CDCl<sub>3</sub>):  $\delta$  7.94 (br s, 1H), 7.66 (d, *J* = 7.9 Hz, 1H), 7.39 (dt, *J* = 8.2, 0.9 Hz, 1H), 7.26 – 7.23 (m, 1H), 7.19 – 7.15 (m, 1H), 7.02 (s, 1H), 6.13 (ddt, *J* = 16.6, 10.0, 6.5 Hz, 1H), 5.22 (dq, *J* = 17.0, 1.7 Hz, 1H), 5.13 (dq, *J* = 10.0, 1.5 Hz, 1H), 3.58 (dq, *J* = 6.5, 1.3 Hz, 2H); <sup>13</sup>C NMR (125 MHz, CDCl<sub>3</sub>):  $\delta$  137.3, 136.4, 127.4, 122.0, 121.6, 119.2, 119.1, 115.2, 114.5, 111.0, 29.8; HRMS (ESI-TOF) *m/z*: [M + H]<sup>+</sup> Calculated for C<sub>11</sub>H<sub>12</sub>N<sup>+</sup> 158.0964, Found 158.0968.

## 10. Spectroscopic characterization data

**3-Allyl-1H-indole (3a):** Pale yellow liquid (27.0 mg, 86%); <sup>1</sup>H NMR (500 MHz, CDCl<sub>3</sub>): δ 7.94 (br s, 1H), 7.66 (d, *J* = 7.9 Hz, 1H), 7.39 (dt, *J* = 8.2, 0.9 Hz, 1H), 7.26 – 7.23 (m, 1H), 7.19 – 7.15 (m, 1H), 7.02 (s, 1H), 6.13 (ddt, *J* = 16.6, 10.0, 6.5 Hz, 1H), 5.22 (dq, *J* = 17.0, 1.7 Hz, 1H), 5.13 (dq, *J* = 10.0, 1.5 Hz, 1H), 3.58 (dq, *J* = 6.5, 1.3 Hz, 2H); <sup>13</sup>C NMR (125 MHz, CDCl<sub>3</sub>): δ 137.3, 136.4, 127.4, 122.0, 121.6, 119.2, 119.1, 115.2, 114.5, 111.0, 29.8; **HRMS** (ESI-TOF) *m/z*: [M + H]<sup>+</sup> Calculated for C<sub>11</sub>H<sub>12</sub>N<sup>+</sup> 158.0964, Found 158.0968.

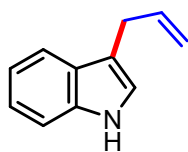

**3-Allyl-5-methyl-1H-indole (4a):** Yellow liquid (28.7 mg, 84%); <sup>1</sup>H NMR (500 MHz, CDCl<sub>3</sub>): δ 7.83 (br s, 1H), 7.38 (s, 1H), 7.23 (dd, *J* = 8.4, 1.5 Hz, 1H), 7.01 (dd, *J* = 8.2, 1.9 Hz, 1H), 6.94 (s, 1H), 6.14 – 5.99 (m, 1H), 5.21 – 5.11 (m, 1H), 5.06 (d, *J* = 10.0 Hz, 1H), 3.49 (dt, *J* = 6.5, 1.3 Hz, 2H), 2.45 (s, 3H); <sup>13</sup>C NMR (125 MHz, CDCl<sub>3</sub>): δ 137.4, 134.8, 128.5, 127.7, 123.6, 121.8, 118.7, 115.1, 114.0, 110.8, 29.8, 21.6; **HRMS** (ESI-TOF) *m/z*: [M + H]<sup>+</sup> Calculated for C<sub>12</sub>H<sub>14</sub>N<sup>+</sup> 172.1121, Found 172.1122.

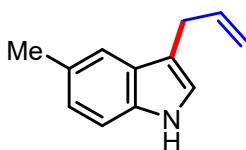

**3-Allyl-7-methyl-1H-indole (4b):** Yellow liquid (29.5 mg, 86%); <sup>1</sup>H NMR (500 MHz, CDCl<sub>3</sub>): δ 7.83 (br s, 1H), 7.50 – 7.41 (m, 1H), 7.04 (t, *J* = 7.5 Hz, 1H), 7.01 – 6.96 (m, 2H), 6.06 (ddt, *J* = 16.6, 10.0, 6.5 Hz, 1H), 5.15 (dq, *J* = 17.0, 1.7 Hz, 1H), 5.06 (dq, *J* = 10.0, 1.6 Hz, 1H), 3.52 (dq, *J* = 6.4, 1.4 Hz, 2H), 2.46 (s, 3H); <sup>13</sup>C NMR (125 MHz, CDCl<sub>3</sub>): δ 137.3, 136.0, 127.0, 122.5, 121.3, 120.2, 119.5, 116.8, 115.1, 115.1, 29.9, 16.6; **HRMS** (ESI-TOF) *m/z*: [M + H]<sup>+</sup> Calculated for C<sub>12</sub>H<sub>14</sub>N<sup>+</sup> 172.1121, Found 172.1130.

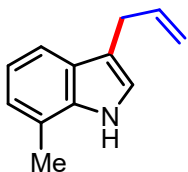

**3-Allyl-5-fluoro-1H-indole (4c):** Dark brown liquid (29.4 mg, 84%); <sup>1</sup>H NMR (500 MHz, CDCl<sub>3</sub>): δ 7.97 (br s, 1H), 7.31 – 7.26 (m, 2H), 7.06 (s, 1H), 7.00 – 6.95 (m, 1H), 6.11 – 6.03 (m, 1H), 5.19 (dt, *J* = 17.1, 1.8 Hz, 1H), 5.12 (dt, *J* = 10.0, 1.7 Hz, 1H), 3.51 (d, *J* = 6.4 Hz, 2H); <sup>13</sup>C NMR (125 MHz, CDCl<sub>3</sub>): δ 157.7 (d, *J* = 234.3 Hz), 136.9, 132.9, 127.8 (d, *J* = 9.7 Hz), 123.5, 115.5, 114.7 (d, *J* = 4.9 Hz), 111.7 (d, *J* = 9.7 Hz), 110.4 (d, *J* = 26.3 Hz), 104.1 (d, *J* = 23.4 Hz), 29.8; <sup>19</sup>F NMR (471 MHz, CDCl<sub>3</sub>): δ -124.76; **HRMS** (ESI-TOF) *m/z*: [M + H]<sup>+</sup> Calculated for C<sub>11</sub>H<sub>11</sub>NF<sup>+</sup> 176.0870, Found 176.0870.

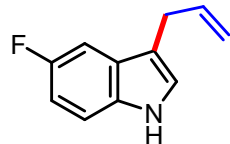

**3-Allyl-4-bromo-1H-indole (4d):** Blackish-brown liquid (30.7 mg, 65%); <sup>1</sup>H NMR (500 MHz, CDCl<sub>3</sub>): δ 8.05 (br s, 1H), 7.32 – 7.26 (m, 2H), 7.09 – 6.90 (m, 2H), 6.28 – 6.07 (m, 1H), 5.10 (dq, *J* = 14.0, 1.9 Hz, 2H), 3.84 (dq, *J* = 6.4, 1.4 Hz, 2H); <sup>13</sup>C NMR (125 MHz, CDCl<sub>3</sub>): δ 137.0, 136.7, 124.4, 122.9, 122.4, 121.8, 114.8, 114.3, 113.4, 109.4, 29.7; **HRMS** (ESI-TOF) *m/z*: [M + H]<sup>+</sup> Calculated for C<sub>11</sub>H<sub>11</sub>BrN<sup>+</sup> 236.0069, Found 236.0073.

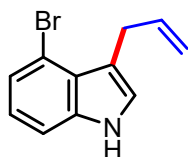



**3-Allyl-6-chloro-5-fluoro-1H-indole (4e):** Yellow liquid (32.3 mg, 77%); <sup>1</sup>H NMR (500 MHz, CDCl<sub>3</sub>): δ 7.93 (br s, 1H), 7.35 (d, *J* = 6.1 Hz, 1H), 7.30 (d, *J* = 9.7 Hz, 1H), 7.02 (d, *J* = 2.3 Hz, 1H), 6.01 (ddt, *J* = 16.6, 10.0, 6.4 Hz, 1H), 5.14 (dq, *J* = 17.0, 1.7 Hz, 1H), 5.09 (dq, *J* = 10.0, 1.5 Hz, 1H), 3.50 – 3.36 (m, 2H); <sup>13</sup>C NMR (125 MHz, CDCl<sub>3</sub>): δ 152.8 (d, *J* = 237.6 Hz), 136.6, 132.6, 126.4 (d, *J* = 8.6 Hz), 123.9, 115.7 (d, *J* = 21.4 Hz), 115.7, 114.8 (d, *J* = 4.6 Hz), 112.2, 105.2 (d, *J* = 23.2 Hz), 29.7; <sup>19</sup>F NMR (471 MHz, CDCl<sub>3</sub>): δ -127.10; HRMS (ESI-TOF) *m/z*: [M + H]<sup>+</sup> Calculated for C<sub>11</sub>H<sub>10</sub>ClFN<sup>+</sup> 210.0480, Found 210.0486.

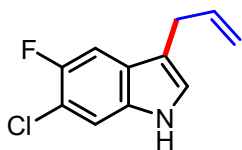

**3-Allyl-5-methoxy-1H-indole (4f):** Pale yellow liquid (32.9 mg, 88%); <sup>1</sup>H NMR (500 MHz, CDCl<sub>3</sub>): δ 7.84 (br s, 1H), 7.23 (d, *J* = 8.8 Hz, 1H), 7.03 (d, *J* = 2.5 Hz, 1H), 6.96 (dd, *J* = 2.4, 1.1 Hz, 1H), 6.85 (dd, *J* = 8.8, 2.5 Hz, 1H), 6.06 (ddt, *J* = 16.6, 10.0, 6.5 Hz, 1H), 5.20 – 5.12 (m, 1H), 5.16 (dq, *J* = 17.1, 1.8 Hz, 1H), 5.07 (dq, *J* = 10.0, 1.5 Hz, 1H), 3.85 (s, 3H), 3.49 (dq, *J* = 6.5, 1.4 Hz, 2H); <sup>13</sup>C NMR (125 MHz, CDCl<sub>3</sub>): δ 153.9, 137.2, 131.6, 127.8, 122.5, 115.2, 114.2, 112.2, 111.8, 101.0, 55.9, 29.9; HRMS (ESI-TOF) *m/z*: [M + H]<sup>+</sup> Calculated for C<sub>12</sub>H<sub>14</sub>NO<sup>+</sup> 188.1070, Found 188.1071.

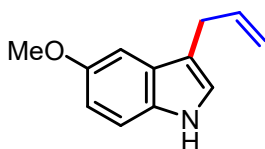

**3-Allyl-5-(benzyloxy)-1H-indole (4g):** Pale yellow liquid (41.6 mg, 79%); <sup>1</sup>H NMR (500 MHz, CDCl<sub>3</sub>): δ 7.73 (br s, 1H), 7.45 (dd, *J* = 7.2, 2.3 Hz, 2H), 7.38 – 7.32 (m, 2H), 7.31 – 7.24 (m, 1H), 7.15 – 7.04 (m, 2H), 6.90 (dt, *J* = 8.7, 2.1 Hz, 1H), 6.82 (s, 1H), 6.10 – 5.93 (m, 1H), 5.17 – 5.10 (m, 1H), 5.12 – 5.00 (m, 2H), 3.49 – 3.39 (m, 2H); <sup>13</sup>C NMR (125 MHz, CDCl<sub>3</sub>): δ 153.1, 137.8, 137.3, 131.9, 128.7, 127.9 (d, *J* = 4.6 Hz), 127.8, 122.8, 122.8, 115.3, 114.1, 112.9, 112.0, 102.9, 71.2, 30.0; HRMS (ESI-TOF) *m/z*: [M + H]<sup>+</sup> Calculated for C<sub>18</sub>H<sub>18</sub>NO<sup>+</sup> 264.1383, Found 264.1387.

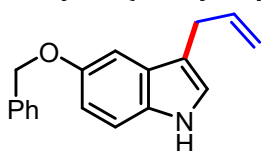

**3-Allyl-1H-indol-5-ol (4h):** Black liquid (23.5 mg, 68%); <sup>1</sup>H NMR (500 MHz, CDCl<sub>3</sub>): δ 7.84 (br s, 1H), 7.21 (d, *J* = 8.6 Hz, 1H), 6.99 (d, *J* = 12.7 Hz, 2H), 6.76 (dd, *J* = 8.6, 2.4 Hz, 1H), 6.11 – 5.98 (m, 2H), 5.15 (d, *J* = 17.0 Hz, 1H), 5.07 (d, *J* = 10.0 Hz, 1H), 4.59 (br s, 1H), 3.53 – 3.38 (m, 2H); <sup>13</sup>C NMR (125 MHz, CDCl<sub>3</sub>): δ 149.2, 137.2, 131.8, 128.2, 122.9, 115.2, 113.9, 111.7, 111.7, 103.7, 29.9; HRMS (ESI-TOF) *m/z*: [M + H]<sup>+</sup> Calculated for C<sub>11</sub>H<sub>12</sub>NO<sup>+</sup> 174.0913, Found 174.0915.

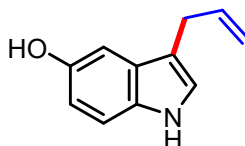

**N,3-diallyl-1H-indol-5-amine (4i):** Brown liquid (27.6 mg, 65%); <sup>1</sup>H NMR (500 MHz, CDCl<sub>3</sub>): δ 7.78 (br s, 1H), 7.15 (d, *J* = 8.6 Hz, 1H), 6.93 – 6.76 (m, 2H), 6.63 (dd, *J* = 8.6, 2.2 Hz, 1H), 6.17 – 5.90 (m, 2H), 5.31 (dq, *J* = 17.2, 1.6 Hz, 1H), 5.21 – 5.12 (m, 2H), 5.05 (dq, *J* = 10.0, 1.4 Hz, 1H), 3.81 (dt, *J* = 5.5, 1.6 Hz, 2H), 3.45 (dq, *J* = 6.4, 1.3 Hz, 2H), 3.15 (br s, 1H); <sup>13</sup>C NMR (125 MHz, CDCl<sub>3</sub>): δ 141.7, 137.4, 136.1, 130.8, 128.2, 122.1, 116.1, 115.0, 113.5, 112.2, 111.7, 101.3, 48.2, 29.9; HRMS (ESI-TOF) *m/z*: [M + H]<sup>+</sup> Calculated for C<sub>14</sub>H<sub>17</sub>N<sub>2</sub><sup>+</sup> 213.1386, Found 213.1390.

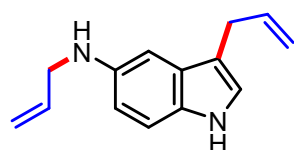

**Methyl-3-allyl-1H-indole-5-carboxylate (4j):** White solid (31.0 mg, 72%); mp: 104 – 106 °C; <sup>1</sup>H NMR (500 MHz, CDCl<sub>3</sub>): δ 8.34 (br s, 1H), 8.16 (dd, *J* = 1.5, 0.7 Hz, 1H), 7.83 (dd, *J* = 8.4, 1.5 Hz, 1H), 7.64 (dd, *J* = 8.4, 0.8 Hz, 1H), 7.18 (dd, *J* = 2.2, 1.1 Hz, 1H), 6.09 (ddt, *J* = 16.5, 10.0, 6.4 Hz, 1H), 5.18 (dq, *J* = 17.1, 1.8 Hz, 1H), 5.12 (dq, *J* = 10.0, 1.5 Hz, 1H), 3.96 (s, 3H), 3.56 (dq, *J* = 6.4, 1.4 Hz, 2H); <sup>13</sup>C NMR (125 MHz, CDCl<sub>3</sub>): δ 168.3, 136.8, 135.7, 131.0, 125.2, 123.7, 120.3, 118.7, 115.6, 115.0, 113.5, 52.0, 29.6; **HRMS** (ESI-TOF) *m/z*: [M + H]<sup>+</sup> Calculated for C<sub>13</sub>H<sub>14</sub>NO<sub>2</sub><sup>+</sup> 216.1019, Found 216.1021.

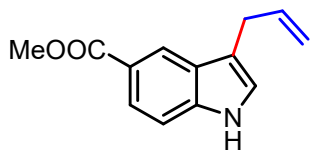

**3-Allyl-2-methyl-1H-indole (4l):** Pale yellow liquid (24.6 mg, 72%); <sup>1</sup>H NMR (500 MHz, CDCl<sub>3</sub>): δ 7.70 (br s, 1H), 7.49 (d, *J* = 7.7 Hz, 1H), 7.25 (dt, *J* = 8.6, 1.2 Hz, 1H), 7.14 – 7.02 (m, 2H), 5.97 (ddt, *J* = 17.2, 10.0, 6.2 Hz, 1H), 5.05 (dq, *J* = 17.0, 1.8 Hz, 1H), 4.99 (dq, *J* = 10.1, 1.7 Hz, 1H), 3.45 (dt, *J* = 6.1, 1.7 Hz, 2H), 2.35 (s, 3H); <sup>13</sup>C NMR (125 MHz, CDCl<sub>3</sub>): δ 137.4, 135.2, 131.3, 128.7, 121.0, 119.1, 118.2, 114.4, 110.1, 109.3, 28.6, 11.6; **HRMS** (ESI-TOF) *m/z*: [M + H]<sup>+</sup> Calculated for C<sub>12</sub>H<sub>14</sub>N<sup>+</sup> 172.1121, Found 172.1112.

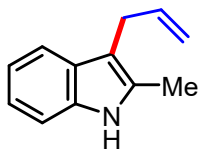

**3-Allyl-2-phenyl-1H-indole (4m):** Pale yellow liquid (32.6 mg, 70%); <sup>1</sup>H NMR (500 MHz, CDCl<sub>3</sub>): δ 8.06 (br s, 1H), 7.63 – 7.54 (m, 3H), 7.47 (t, *J* = 7.7 Hz, 2H), 7.38 (dd, *J* = 7.7, 5.4 Hz, 2H), 7.21 (t, *J* = 7.6 Hz, 1H), 7.13 (t, *J* = 7.5 Hz, 1H), 6.13 (ddt, *J* = 16.3, 10.8, 5.6 Hz, 1H), 5.16 – 5.05 (m, 2H), 3.63 (dt, *J* = 5.7, 1.8 Hz, 2H); <sup>13</sup>C NMR (125 MHz, CDCl<sub>3</sub>): δ 137.4, 135.9, 134.8, 133.0, 129.4, 128.9, 127.9, 127.7, 122.4, 119.7, 119.4, 115.2, 110.8, 110.5, 29.0; **HRMS** (ESI-TOF) *m/z*: [M + H]<sup>+</sup> Calculated for C<sub>17</sub>H<sub>16</sub>N<sup>+</sup> 234.1277, Found 234.1277.

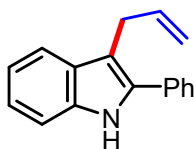

**3-(2-En-1-yl)-1H-indole (5a):** (Obtained as mixture: linear: branch in 1.5:1 ratio) Pale yellow liquid (27.4 mg, 80%); <sup>1</sup>H NMR (500 MHz, CDCl<sub>3</sub>): δ 7.87 (br s, 1H), 7.68 – 7.63 (m, 1H), 7.39 – 7.33 (m, 1H), 7.25 – 7.20 (m, 1H), 7.15 (ddt, *J* = 7.0, 6.1, 1.7 Hz, 1H), 6.98 (dt, *J* = 2.3, 1.0 Hz, 1H), 5.81 – 5.69 (m, 1H), 5.68 – 5.60 (m, 1H), 3.49 (dq, *J* = 6.4, 1.3 Hz, 2H), 1.73 (dq, *J* = 6.2, 1.4 Hz, 3H); <sup>13</sup>C NMR (125 MHz, CDCl<sub>3</sub>): 143.3, 136.5, 129.9, 125.7, 122.0, 121.5, 119.2, 112.8, 111.1, 34.9, 28.6, 17.9; **HRMS** (ESI-TOF) *m/z*: [M + H]<sup>+</sup> Calculated for C<sub>12</sub>H<sub>14</sub>N<sup>+</sup> 172.1121, Found 172.1114.

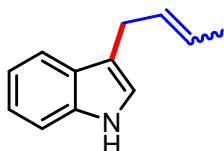

**3-(2-Methylallyl)-1H-indole (5b):** Pale yellow liquid (26.8 mg, 78%); <sup>1</sup>H NMR (500 MHz, CDCl<sub>3</sub>): δ 7.88 (br s, 1H), 7.61 (dd, *J* = 8.0, 1.1 Hz, 1H), 7.33 (dt, *J* = 8.1, 1.0 Hz, 1H), 7.18 (ddd, *J* = 8.1, 6.9, 1.2 Hz, 1H), 7.10 (ddd, *J* = 8.0, 6.9, 1.0 Hz, 1H), 6.97 (d, *J* = 2.3 Hz, 1H), 4.82 (ddd, *J* = 7.1, 2.4, 1.2 Hz, 2H), 3.47 (d, *J* = 1.3 Hz, 2H), 1.75 (s, 3H); <sup>13</sup>C NMR (125 MHz, CDCl<sub>3</sub>): δ 145.1, 136.4, 127.8, 122.3, 121.9, 119.4, 119.2, 114.1, 111.1, 111.1, 34.1, 22.3; **HRMS** (ESI-TOF) *m/z*: [M + H]<sup>+</sup> Calculated for C<sub>12</sub>H<sub>14</sub>N<sup>+</sup> 172.1121, Found 172.1115.

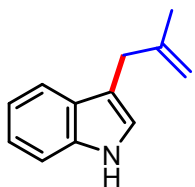

**3-(Hex-2-en-1-yl)-1H-indole (5c):** Pale yellow liquid (31.1 mg, 78%);  $^1\text{H NMR}$  (500 MHz,  $\text{CDCl}_3$ ):  $\delta$  7.87 (br s, 1H), 7.61 (dq,  $J = 7.9, 0.9$  Hz, 1H), 7.33 (dt,  $J = 8.1, 1.0$  Hz, 1H), 7.20 – 7.16 (m, 1H), 7.13 – 7.08 (m, 1H), 6.95 (dt,  $J = 2.3, 1.0$  Hz, 1H), 5.70 – 5.63 (m, 1H), 5.62 – 5.54 (m, 1H), 3.46 (dp,  $J = 6.6, 1.1$  Hz, 2H), 2.04 – 1.97 (m, 2H), 1.39 (h,  $J = 7.3$  Hz, 2H), 0.90 (t,  $J = 7.4$  Hz, 3H);  $^{13}\text{C NMR}$  (125 MHz,  $\text{CDCl}_3$ ):  $\delta$  136.5, 131.2, 128.7, 127.5, 121.9, 121.4, 119.2, 119.2, 115.7, 111.1, 34.7, 28.7, 22.7, 13.8; **HRMS** (ESI-TOF)  $m/z$ :  $[\text{M} + \text{H}]^+$  Calculated for  $\text{C}_{14}\text{H}_{18}\text{N}^+$  200.1434, Found 200.1431.

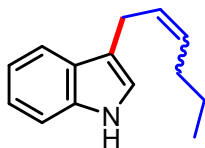

**3-Cinnamyl-1H-indole (5d):** White solid (38.2 mg, 82%); mp: 99 – 101 °C;  $^1\text{H NMR}$  (500 MHz,  $\text{CDCl}_3$ ):  $\delta$  7.93 (br s, 1H), 7.70 – 7.60 (m, 2H), 7.36 (dd,  $J = 7.5, 1.3$  Hz, 3H), 7.31 – 7.26 (m, 2H), 7.22 – 7.16 (m, 2H), 7.14 – 7.08 (m, 1H), 7.02 (dd,  $J = 2.3, 1.1$  Hz, 1H), 3.68 (dt,  $J = 6.3, 1.1$  Hz, 2H);  $^{13}\text{C NMR}$  (125 MHz,  $\text{CDCl}_3$ ):  $\delta$  137.7, 136.4, 130.4, 129.3, 128.5, 127.5, 127.0, 126.1, 122.1, 121.8, 119.4, 119.2, 114.7, 111.1, 29.0; **HRMS** (ESI-TOF)  $m/z$ :  $[\text{M} + \text{H}]^+$  Calculated for  $\text{C}_{17}\text{H}_{16}\text{N}^+$  234.1277, Found 234.1277.

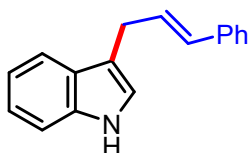

**(E)-3-(1,3-Diphenylallyl)-1H-indole (5e):** Orange liquid (42.7 mg, 69%);  $^1\text{H NMR}$  (500 MHz,  $\text{CDCl}_3$ ):  $\delta$  7.82 (br s, 1H), 7.41 (dd,  $J = 8.0, 1.0$  Hz, 1H), 7.36 – 7.31 (m, 4H), 7.30 – 7.24 (m, 5H), 7.23 – 7.18 (m, 1H), 7.18 – 7.12 (m, 2H), 7.01 (ddd,  $J = 8.0, 7.0, 1.0$  Hz, 1H), 6.81 (dd,  $J = 2.5, 1.0$  Hz, 1H), 6.70 (dd,  $J = 15.8, 7.4$  Hz, 1H), 6.42 (dd,  $J = 15.8, 1.3$  Hz, 1H), 5.09 (d,  $J = 7.4$  Hz, 1H);  $^{13}\text{C NMR}$  (125 MHz,  $\text{CDCl}_3$ ):  $\delta$  143.5, 137.6, 136.7, 132.6, 130.6, 128.6, 128.5, 127.3, 126.9, 126.5, 126.4, 122.7, 122.2, 120.0, 119.5, 118.7, 111.2, 46.3; **HRMS** (ESI-TOF)  $m/z$ :  $[\text{M} + \text{H}]^+$  Calculated for  $\text{C}_{23}\text{H}_{20}\text{N}^+$  310.1590, Found 310.1590.

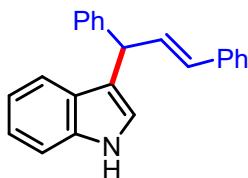

**3-(Cyclohex-2-en-1-yl)-1H-indole (5f):** Pale yellow liquid (31.9 mg, 81%);  $^1\text{H NMR}$  (500 MHz,  $\text{CDCl}_3$ ):  $\delta$  7.64 (d,  $J = 7.9$  Hz, 1H), 7.60 (br s, 1H), 7.22 (d,  $J = 8.1$  Hz, 1H), 7.18 – 7.13 (m, 1H), 7.09 (ddd,  $J = 8.0, 6.9, 1.1$  Hz, 1H), 6.81 (d,  $J = 2.4$  Hz, 1H), 5.84 (s, 2H), 3.70 (t,  $J = 6.2$  Hz, 1H), 2.12 – 1.98 (m, 3H), 1.85 – 1.55 (m, 3H);  $^{13}\text{C NMR}$  (125 MHz,  $\text{CDCl}_3$ ):  $\delta$  135.5, 129.3, 126.5, 125.5, 120.7, 120.4, 119.7, 118.1, 118.0, 110.1, 31.6, 29.1, 24.2, 19.8; **HRMS** (ESI-TOF)  $m/z$ :  $[\text{M} + \text{H}]^+$  Calculated for  $\text{C}_{14}\text{H}_{16}\text{N}^+$  198.1277, Found 198.1277.

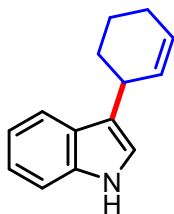

**3,3-Diallylindolin-2-one (6b):** White solid (17.9 mg, 42%); mp: 97 – 99 °C;  $^1\text{H NMR}$  (500 MHz,  $\text{CDCl}_3$ ):  $\delta$  9.30 (br s, 1H), 7.23 – 7.14 (m, 2H), 7.03 (t,  $J = 7.5$  Hz, 1H), 6.92 (d,  $J = 7.7$  Hz, 1H), 5.46 (ddt,  $J = 17.4, 10.1, 7.3$  Hz, 2H), 5.01 (dd,  $J = 17.1, 2.0$  Hz, 2H), 4.91 (dd,  $J = 10.1, 2.0$  Hz, 2H), 2.59 (h,  $J = 7.1, 6.7$  Hz, 4H);  $^{13}\text{C NMR}$  (125 MHz,  $\text{CDCl}_3$ ):  $\delta$  181.9, 141.0, 132.1, 131.8, 127.8, 123.6, 122.2, 118.8, 109.8, 53.3, 41.2; **HRMS** (ESI-TOF)  $m/z$ :  $[\text{M} + \text{H}]^+$  Calculated for  $\text{C}_{14}\text{H}_{16}\text{NO}^+$  214.1226, Found 214.1222.

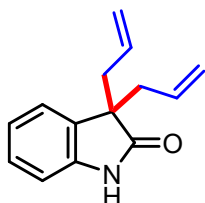

**1-Allylindoline (7a):** Pale yellow liquid (28.0 mg, 88%); **<sup>1</sup>H NMR** (500 MHz, CDCl<sub>3</sub>): δ 7.14 – 6.98 (m, 1H), 6.65 (td, *J* = 7.3, 1.0 Hz, 1H), 6.51 (d, *J* = 7.8 Hz, 1H), 5.91 (ddt, *J* = 17.2, 10.2, 6.0 Hz, 1H), 5.28 (dq, *J* = 17.1, 1.7 Hz, 1H), 5.19 (dq, *J* = 10.2, 1.5 Hz, 1H), 3.70 (dt, *J* = 6.0, 1.5 Hz, 2H), 3.33 (t, *J* = 8.3 Hz, 2H), 2.96 (t, *J* = 8.3 Hz, 2H); **<sup>13</sup>C NMR** (125 MHz, CDCl<sub>3</sub>): δ 152.2, 134.2, 130.3, 127.2, 124.4, 117.7, 117.3, 107.3, 53.2, 52.2, 28.5; **HRMS** (ESI-TOF) *m/z*: [M + H]<sup>+</sup> Calculated for C<sub>11</sub>H<sub>14</sub>N<sup>+</sup> 160.1121, Found 160.1125.

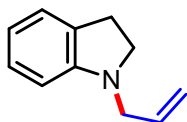

## 11. Role of water toward the activation of allylic alcohols

**Supporting fact 1. Reaction does not proceed in organic solvent lacking H-bond donor property**

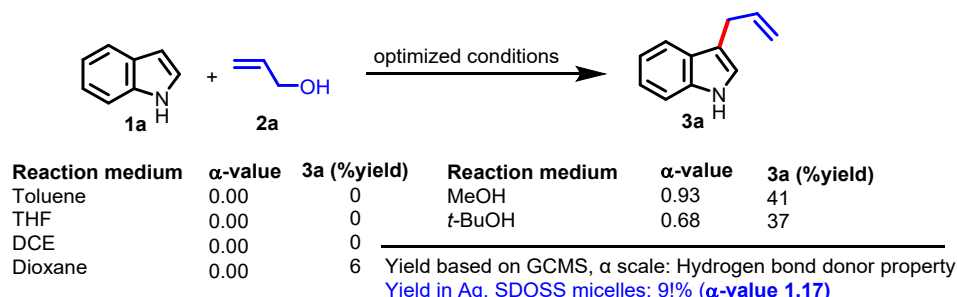

NOTE: Hydrogen bond donor (HBD) property ( $\alpha$ -scale) of MeOH (0.97) and *t*-BuOH (0.68) is relatively poor compared to water (1.17) [*Green Chem.*, **2013**,15, 798].

**Supporting fact 2. The reaction does not proceed in Trifluoroethanol (TFE) and hexafluoroisopropanol (HFP) due to the lack of stabilization of the resulting hydroxide ion.**

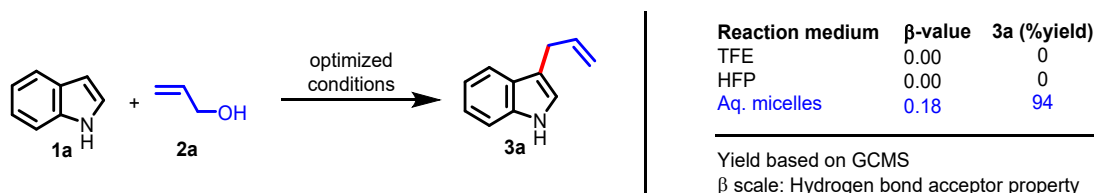

NOTE: While the hydrogen bond donor (HBD) property ( $\alpha$ -scale) is expected to be the major/critical factor, the  $\beta$  value would also contribute to the overall outcome of the reaction. Thus, despite having better  $\alpha$  values compared to that of water [ $\alpha$  scale: 1.51 (TFE), 1.96 (HFP), 1.17 (water)], no product formation was observed in TFE and HFP due to their poor  $\beta$  values [ $\beta$  scale: 0.00 (TFE), 0.00 (TFP), 0.18 (water)].

**Supporting fact 3. Reaction kinetics, H<sub>2</sub>O vs MeOH, clearly indicates the role of H-bonding towards the activation of allylic alcohol**

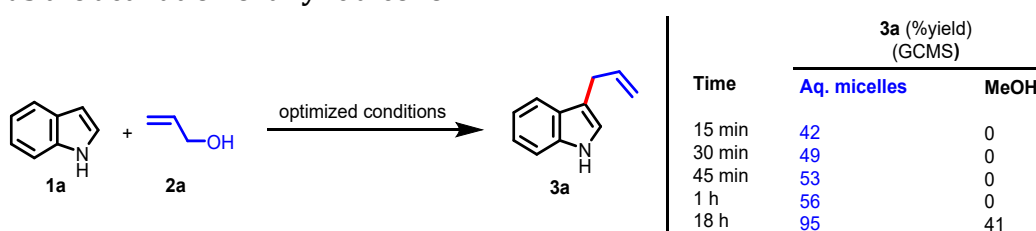

**Supporting fact 4. Reaction kinetics, H<sub>2</sub>O vs D<sub>2</sub>O, clearly indicates the role of H-bonding towards the activation of allylic alcohol**

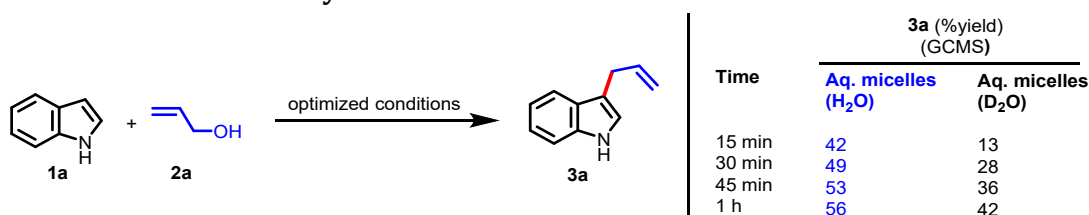

**Supporting fact 5. Reaction kinetics, MeOH vs CD<sub>3</sub>OD vs CD<sub>3</sub>OH clearly indicates the role of H-bonding towards the activation of allylic alcohol**

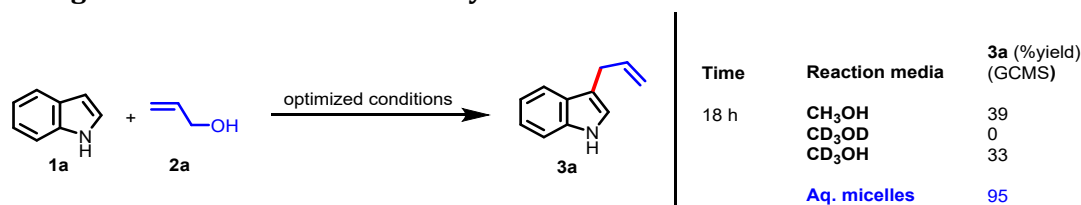

**NOTE:** The substitution of deuterium for hydrogen affects the strength of HB. Hence a reduction in the product yield would occur when carrying out the reaction in corresponding deuterated reaction media. This is indicative of the hydrogen bonding (HB) effect on the reaction progress and outcomes. [*J. Am. Chem. Soc.*, **1959**, *81*, 5048].

**Supporting fact 6: Reaction proceeds with suitably activated allylic amines in aqueous SDOSS micelles but not in an organic solvent**

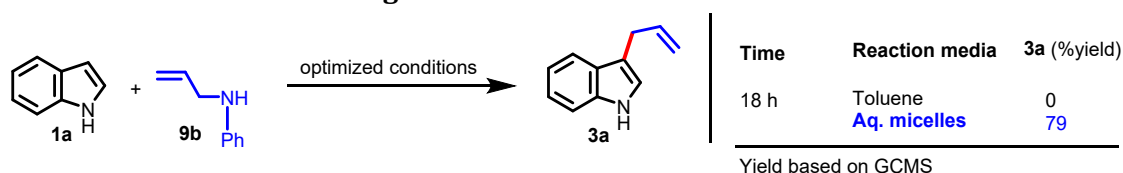

**Supporting fact 7: H-Bond Assisted Intermolecular N→C Allylic Migration via π-AllylNi Complexation**

The reaction of **4i** with **1a** was carried out under optimized conditions and the crude reaction mixture was analysed using the mass technique. As expected, the formation of 5-aminoindole **4ia** along with 3-allyl indole **3a** was detected. Additionally, the mass peak corresponding to *N*-allyl indole **4ib** was observed as well.

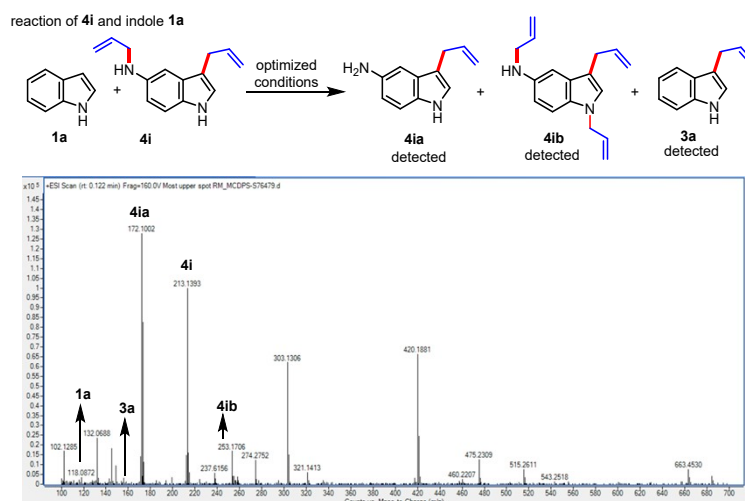

To make the case clear, analysis of the reaction mixture involving *N*-allyl-aniline **9b** with **1a** under optimized conditions was done. The data revealed the formation of 3-allyl indole **3a** along with aniline, conforming to the intermolecular N→C allylic migration via π-allylNi complexation.

reaction of **1a** and indole **9b**

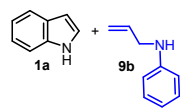

optimized conditions

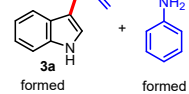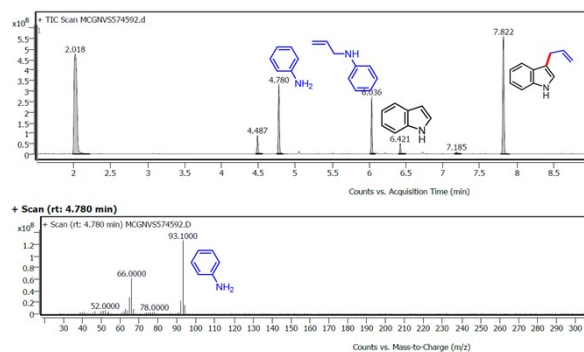

Further, the reaction of *N*-Allyl-4-methyl aniline **9c** with **1a** under optimized conditions resulted in **3a** along with *p*-toluidine (GCMS), strengthening the concept of intermolecular N→C allylic migration via  $\pi$ -AllylNi complexation.

reaction of **1a** and indole **9g**

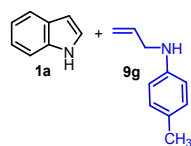

optimized conditions

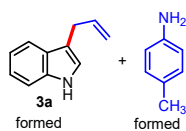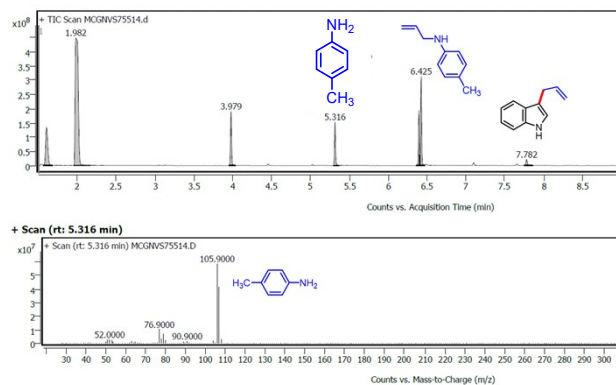

## Supporting fact 8: Spectroscopic studies

Working limitations: Since reaction proceeds well in water only, the online NMR monitoring of the optimized reaction excluding **1a** was done in D<sub>2</sub>O, however the solubility (miscibility) of the reaction mixture is an issue. We observed the formation of lumps in the NMR tube, and thus experienced limitations in terms of characterization of reaction species and or intermediates. **Reaction does not proceed in deuterated methanol CD<sub>3</sub>OD at all; therefore, this option has been ruled out.** Lastly, we tried the above-mentioned reaction in CD<sub>3</sub>OH and the data are presented here.

The treatment of allyl alcohol with Ni(cod)<sub>2</sub> and PPh<sub>3</sub> in CD<sub>3</sub>OH under optimized conditions were monitored at 10 min. intervals. Although not conclusive, it is suggestive of p-allyl nickel complexation.

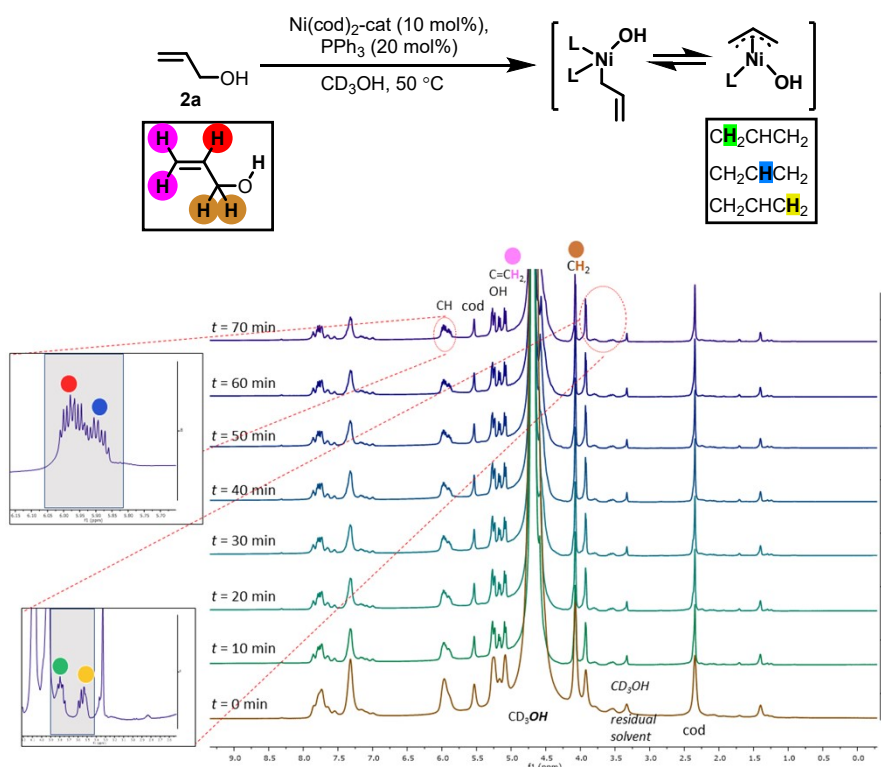

**Figure S15. Monitoring of the of 2a under optimized conditions in CD<sub>3</sub>OH by <sup>1</sup>H NMR**

Further, the appearance of a new peak (other than peak corresponds to PPh<sub>3</sub> and P(O)PPh<sub>3</sub>) in <sup>31</sup>P NMR while monitoring the progress of optimized reaction conditions is the indicative of complexation of PPh<sub>3</sub> with nickel.

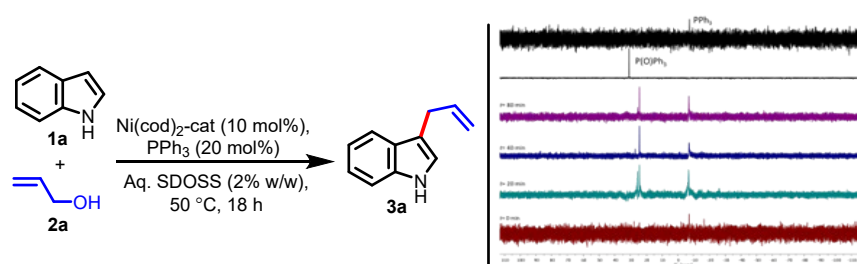

**Figure S16. Monitoring of the optimized reaction in CD<sub>3</sub>OH by <sup>1</sup>H NMR**



## 12. Selectivity study

Typical procedure for intermolecular competition study involving two different indoles:

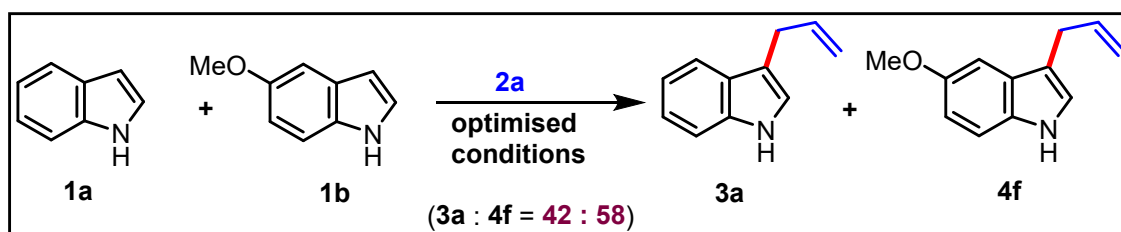

In a glove box, to an oven dried sealed tube equipped with a stirring bar, Ni(cod)<sub>2</sub> (5.1 mg, 0.02 mmol, 10 mol%), PPh<sub>3</sub> (10.5 mg, 0.04 mmol, 20 mol%), indole **1a** (23.5 mg, 0.2 mmol), 5-Methoxy indole (29.4 mg, 0.2 mmol), allyl alcohol **2a** (11.6 mg, 13.6  $\mu$ L, 0.2 mmol, 1 equiv), and Aq. SDOSS (2% w/w, 0.5 mL) were added. The resultant mixture was stirred at 50 °C for 18 h. The cooled (room temp.) reaction mixture was diluted with EtOAc (0.5 mL) and vortexed. From the organic layer containing crude reaction mixture, an aliquot portion (20  $\mu$ L) was taken out, diluted with MeOH (upto 1 mL) and subjected to GCMS to observe the selectivity, which reflected an 42:58 selectivity in favor of **4f**.

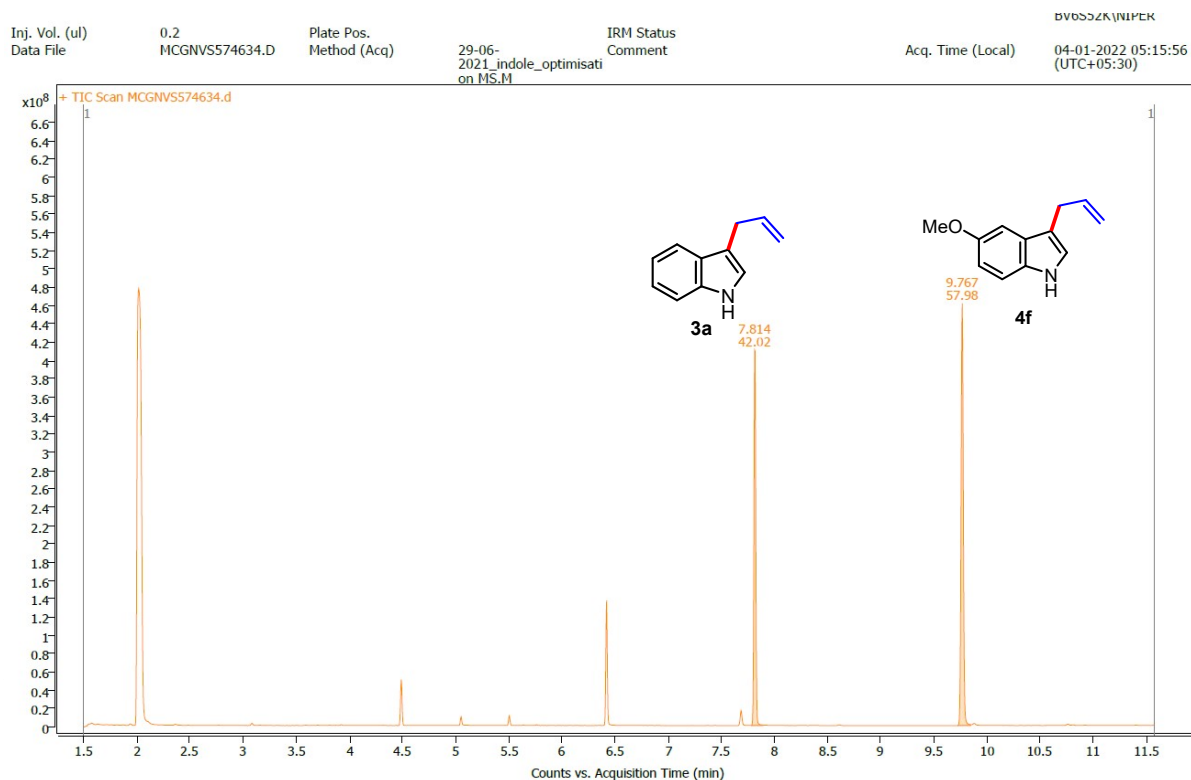

Figure S17. Chromatographic representation

**Typical procedure for intermolecular competition study involving two different allyl alcohols:**

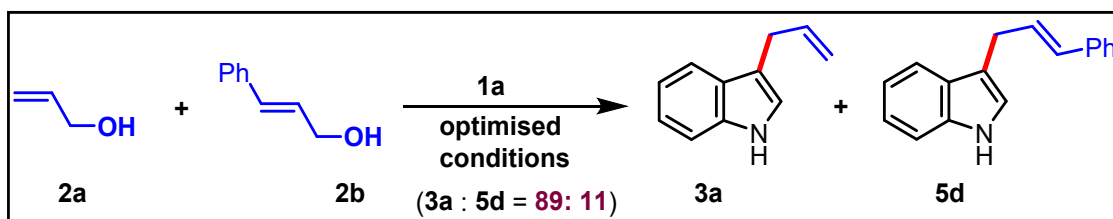

In a glove box, to an oven dried sealed tube equipped with a stirring bar, Ni(cod)<sub>2</sub> (5.1 mg, 0.02 mmol, 10 mol%), PPh<sub>3</sub> (10.5 mg, 0.04 mmol, 20 mol%), indole **1a** (23.5 mg, 0.2 mmol), allyl alcohol **2a** (11.6 mg, 13.6 μL, 0.2 mmol, 1 equiv), cinnamyl alcohol **2b** (26.8 mg, 25.8 μL, 0.2 mmol, 1 equiv) and Aq. SDOSS (2% w/w, 0.5 mL) were added. The resultant mixture was stirred at 50 °C for 18 h. The cooled (room temp.) reaction mixture was diluted with EtOAc (0.5 mL) and vortexed. From the organic layer containing crude reaction mixture, an aliquot portion (20 μL) was taken out, diluted with MeOH (upto 1 mL) and subjected to GCMS (on modified method) to observe the selectivity, which reflected an 89:11 selectivity in favor of **3a**.

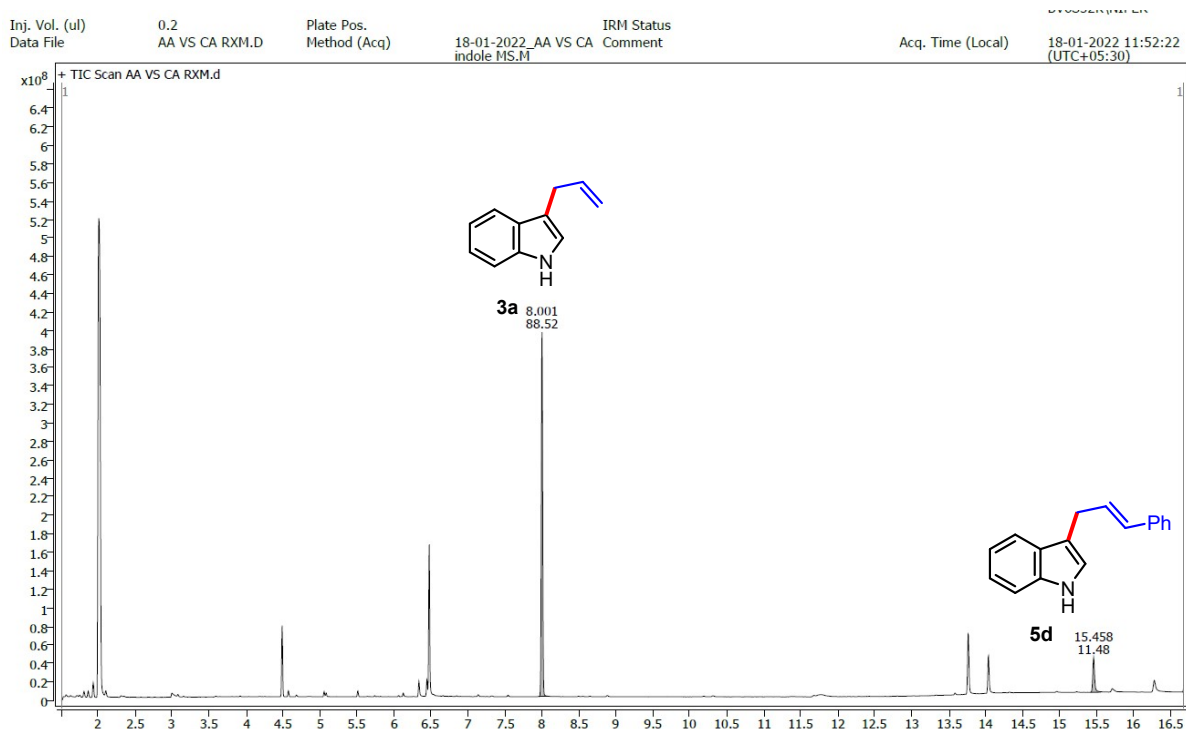

**Figure S18. Chromatographic representation**

### 13. Hammett Plot analysis

**Table S9. Hammett linear free energy relationship study**

| Indole              | Time (min) | % Yield | $\sigma_{(para)}$ | Rate (K) | $K_X/K_H$ | Log $K_X/K_H$ |
|---------------------|------------|---------|-------------------|----------|-----------|---------------|
| R = H               | 15         | 73      | 0.000             | 0.3163   | 1.0000    | 0             |
|                     | 30         | 76      |                   |          |           |               |
|                     | 45         | 81      |                   |          |           |               |
|                     | 60         | 81      |                   |          |           |               |
| R = Me              | 15         | 67      | -0.170            | 0.4197   | 1.3269    | 0.1228        |
|                     | 30         | 82      |                   |          |           |               |
|                     | 45         | 95      |                   |          |           |               |
|                     | 60         | 96      |                   |          |           |               |
| R = OMe             | 15         | 95      | -0.268            | 0.5003   | 1.5819    | 0.1991        |
|                     | 30         | 95      |                   |          |           |               |
|                     | 45         | 100     |                   |          |           |               |
|                     | 60         | 98      |                   |          |           |               |
| R = F               | 15         | 32      | +0.062            | 0.2970   | 0.9392    | -0.0272       |
|                     | 30         | 44      |                   |          |           |               |
|                     | 45         | 57      |                   |          |           |               |
|                     | 60         | 66      |                   |          |           |               |
| R = CN              | 15         | 0       | +0.660            | 0.0000   | 0.0000    | -             |
|                     | 30         | 0       |                   |          |           |               |
|                     | 45         | 0       |                   |          |           |               |
|                     | 60         | 0       |                   |          |           |               |
| R = NO <sub>2</sub> | 15         | 0       | +0.778            | 0.0000   | 0.0000    | -             |
|                     | 30         | 0       |                   |          |           |               |
|                     | 45         | 0       |                   |          |           |               |
|                     | 60         | 0       |                   |          |           |               |

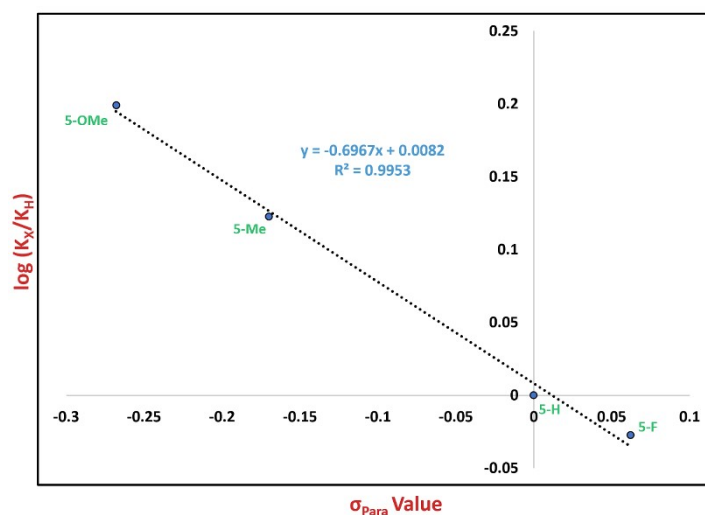

## 14. Scale up study

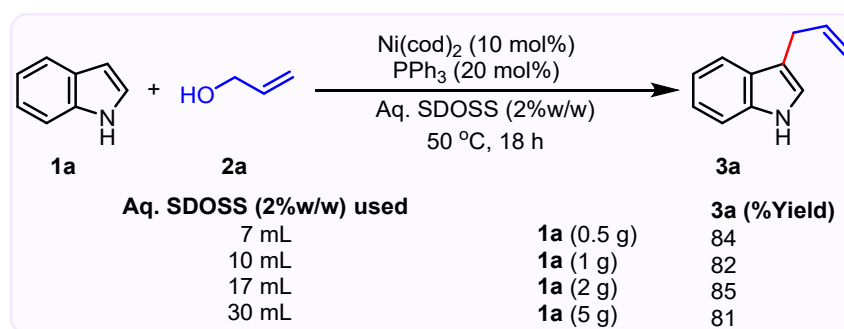

To a well cleaned tube equipped with a stir bar,  $\text{Ni}(\text{cod})_2$  (115.52 mg, 0.42 mmol, 10 mol%),  $\text{PPh}_3$  (223.47 mg, 0.85 mmol, 20 mol%), indole **1a** (500 mg, 4.26 mmol), allyl alcohol **2a** (371.13 mg, 434.6  $\mu\text{L}$ , 6.39 mmol, 1.5 equiv), and Aq. SDOSS (2% w/w, 7 mL) were added. The resultant mixture was stirred at 50 °C for 18 h. The cooled (room temp.) reaction mixture was diluted with EtOAc (2 X 7 mL), vortexed and subjected to aqueous workup. Final washing was done using brine solution. The organic liquid containing product and other organic residue was removed carefully and was dried over anhyd.  $\text{Na}_2\text{SO}_4$  and concentrated under reduced pressure. The crude products were adsorbed on silica gel and pass through the column ( $R_f = 0.47$ ; EtOAc:Hexane = 1:10, v/v) to get analytically pure product **3a** as pale yellow liquid (562.5 mg, 84%);  $^1\text{H NMR}$  (500 MHz,  $\text{CDCl}_3$ ):  $\delta$  7.94 (br s, 1H), 7.66 (d,  $J = 7.9$  Hz, 1H), 7.39 (dt,  $J = 8.2, 0.9$  Hz, 1H), 7.26 – 7.23 (m, 1H), 7.19 – 7.15 (m, 1H), 7.02 (s, 1H), 6.13 (ddt,  $J = 16.6, 10.0, 6.5$  Hz, 1H), 5.22 (dq,  $J = 17.0, 1.7$  Hz, 1H), 5.13 (dq,  $J = 10.0, 1.5$  Hz, 1H), 3.58 (dq,  $J = 6.5, 1.3$  Hz, 2H);  $^{13}\text{C NMR}$  (125 MHz,  $\text{CDCl}_3$ ):  $\delta$  137.3, 136.4, 127.4, 122.0, 121.6, 119.2, 119.1, 115.2, 114.5, 111.0, 29.8; **HRMS** (ESI-TOF)  $m/z$ :  $[\text{M} + \text{H}]^+$  Calculated for  $\text{C}_{11}\text{H}_{12}\text{N}^+$  158.0964, Found 158.0968.

## 15. Recyclability study

### Procedure:

To a well cleaned tube equipped with a stir bar, Ni(cod)<sub>2</sub> (5.1 mg, 0.02 mmol, 10 mol%), PPh<sub>3</sub> (10.5 mg, 0.04 mmol, 20 mol%), indole **1a** (23.5 mg, 0.2 mmol), allyl alcohol **2a** (17.4 mg, 20.1  $\mu$ L, 0.3 mmol, 1.5 equiv), and Aq. SDOSS (2% w/w, 0.8 mL) were added. The resultant mixture was stirred at 50 °C for 18 h. The cooled (room temp.) reaction mixture was diluted with EtOAc (2 X 0.5 mL), vortexed. The organic liquid containing product and other organic residue was removed carefully using microsyringe and was dried over anhyd. Na<sub>2</sub>SO<sub>4</sub> and concentrated under reduced pressure. The crude products were adsorbed on silica gel and pass through the burette column (R<sub>f</sub> = 0.47; EtOAc:Hexane = 1:10, v/v) to get analytically pure product **3a** as pale yellow liquid; <sup>1</sup>H NMR (500 MHz, CDCl<sub>3</sub>):  $\delta$  7.94 (br s, 1H), 7.66 (d, *J* = 7.9 Hz, 1H), 7.39 (dt, *J* = 8.2, 0.9 Hz, 1H), 7.26 – 7.23 (m, 1H), 7.19 – 7.15 (m, 1H), 7.02 (s, 1H), 6.13 (ddt, *J* = 16.6, 10.0, 6.5 Hz, 1H), 5.22 (dq, *J* = 17.0, 1.7 Hz, 1H), 5.13 (dq, *J* = 10.0, 1.5 Hz, 1H), 3.58 (dq, *J* = 6.5, 1.3 Hz, 2H); <sup>13</sup>C NMR (125 MHz, CDCl<sub>3</sub>):  $\delta$  137.3, 136.4, 127.4, 122.0, 121.6, 119.2, 119.1, 115.2, 114.5, 111.0, 29.8; HRMS (ESI-TOF) *m/z*: [M + H]<sup>+</sup> Calculated for C<sub>11</sub>H<sub>12</sub>N<sup>+</sup> 158.0964, Found 158.0968.

To the remaining aqueous layer same protocol as mentioned above was repeated except addition of fresh aqueous TPGS-750-M for product formation in the next consecutive cycles as summarized below.

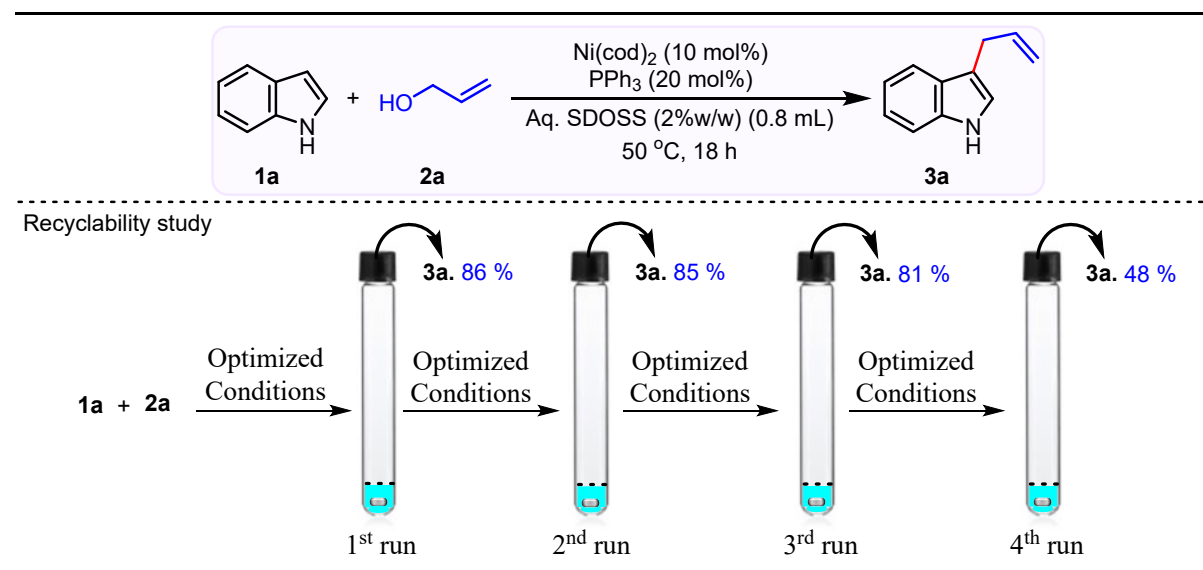

After 3<sup>rd</sup> run the yield was drastically reduced. In order to understand the loss of reactivity, zeta sizer analysis on the particle size distribution after the 3<sup>rd</sup> run (recycled

Aq. SDOSS) was carried out which revealed a dire increase in average particle size (7055.06 nm) as compared to 0<sup>th</sup> run (402.0 nm), suggesting destruction of required nano-micellar composition, and that could be the reason of yield reduction. (See **Figure 17**)

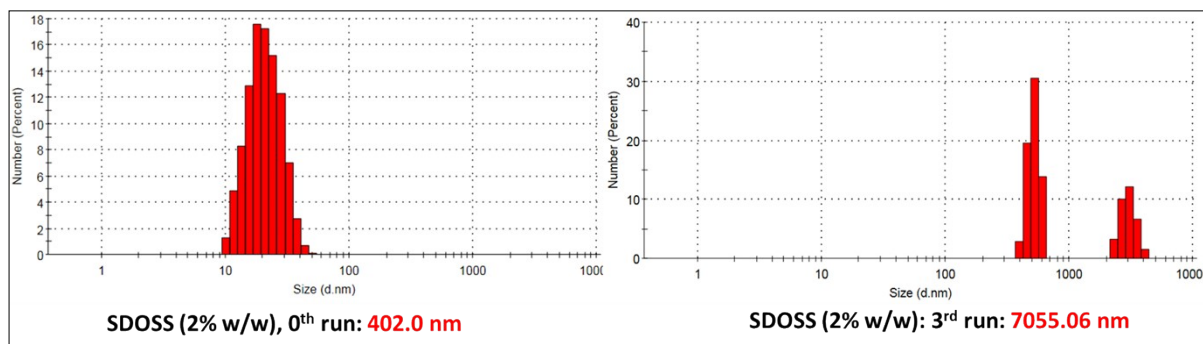

**Figure S19.** Zeta sizer analysis (Particle size distribution) before 0<sup>th</sup> run and after 3<sup>rd</sup> run recyclability

## 16. E-factor determination for the developed protocol:

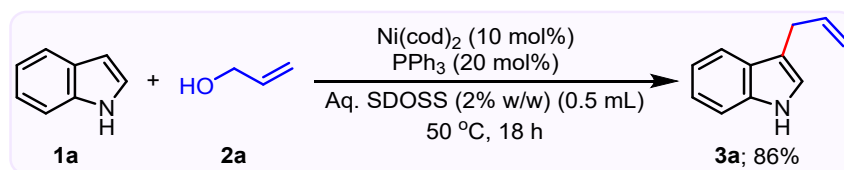

To a well cleaned tube equipped with a stir bar,  $\text{Ni}(\text{cod})_2$  (5.1 mg, 0.02 mmol, 10 mol%),  $\text{PPh}_3$  (10.5 mg, 0.04 mmol, 20 mol%), indole **1a** (23.5 mg, 0.2 mmol), allyl alcohol **2a** (17.4 mg, 20.1  $\mu\text{L}$ , 0.3 mmol, 1.5 equiv), and Aq. SDOSS (2% w/w, 0.4 mL) were added. The resultant mixture was stirred at 50 °C for 18 h. The cooled (room temp.) reaction mixture was diluted with minimal amount of EtOAc (0.2 mL), vortexed and subjected to aqueous workup. The organic liquid containing product and other organic residue was removed carefully using microsyringe and subjected and was dried over anhyd.  $\text{Na}_2\text{SO}_4$  and concentrated under reduced pressure. The crude products were adsorbed on silica gel and pass through the burette column ( $R_f = 0.47$ ; EtOAc:Hexane = 1:10, v/v) to get analytically pure product **3a** as pale yellow liquid (27.0 mg, 86%). Consequently, for the 1<sup>st</sup> Cycle to 3<sup>rd</sup> Cycle: the collected aqueous surfactant media was subjected to weighing of all the reaction component as described above.

### E-factor calculation:

Volume of EtOAc used = 200  $\mu\text{L}$  = 0.2 mL      Volume of  $\text{H}_2\text{O}$  used = 400  $\mu\text{L}$  = 0.4 mL  
 Density of EtOAc = 0.902 g/mL                      Density of  $\text{H}_2\text{O}$  = 1 g/mL

#### Organic waste:

$$\text{E Factor} = \frac{\text{organic waste (g)}}{\text{product (g)}} = \frac{\text{Waste of EtOAc used during workup (g)}}{\text{product (g)}}$$

#### Organic waste + Aqueous waste:

$$\text{E Factor} = \frac{\text{Total waste (g)}}{\text{product (g)}} = \frac{\text{Waste of EtOAc used during workup (g)} + \text{Aqueous waste (g)}}{\text{product (g)}}$$

| 0 <sup>th</sup> Cycle                                       | 1 <sup>st</sup> Cycle | 2 <sup>nd</sup> Cycle | 3 <sup>rd</sup> Cycle   |
|-------------------------------------------------------------|-----------------------|-----------------------|-------------------------|
| <b>Considering only organic waste</b>                       |                       |                       |                         |
| EtOAc used = 0.18 g                                         | EtOAc used = 0.18 g   | EtOAc used = 0.18 g   | EtOAc used = 0.18 g     |
| Product = 0.027 g                                           | Product = 0.0267 g    | Product = 0.0254 g    | Product = 0.015 g       |
| E-Factor = 6.66                                             | E-Factor = 6.74       | E-Factor = 7.08       | E-Factor = 12           |
| <b>Avg E-factor (organic waste) = 8.12</b>                  |                       |                       |                         |
| <b>Considering only organic waste + aqueous waste</b>       |                       |                       |                         |
| Aq. media recycled                                          | Aq. media recycled    | Aq. media recycled    | Aq. media used = 0.5 mL |
| Product = 0.027 g                                           | Product = 0.0267 g    | Product = 0.0254 g    | Product = 0.015 g       |
| Aqueous waste = 0 g                                         | Aqueous waste = 0 g   | Aqueous waste = 0 g   | Aqueous waste = 0.4 g   |
| E-Factor = 6.66                                             | E-Factor = 6.74       | E-Factor = 7.08       | E-Factor = 45.3         |
| <b>Avg E-factor (organic waste + aqueous waste) = 16.44</b> |                       |                       |                         |

## 17. NMR spectra ( $^1\text{H}$ , $^{13}\text{C}$ , $^{19}\text{F}$ NMR):

### 3-Allyl-1H-indole (3a): $^1\text{H}$ NMR (500 MHz, $\text{CDCl}_3$ )

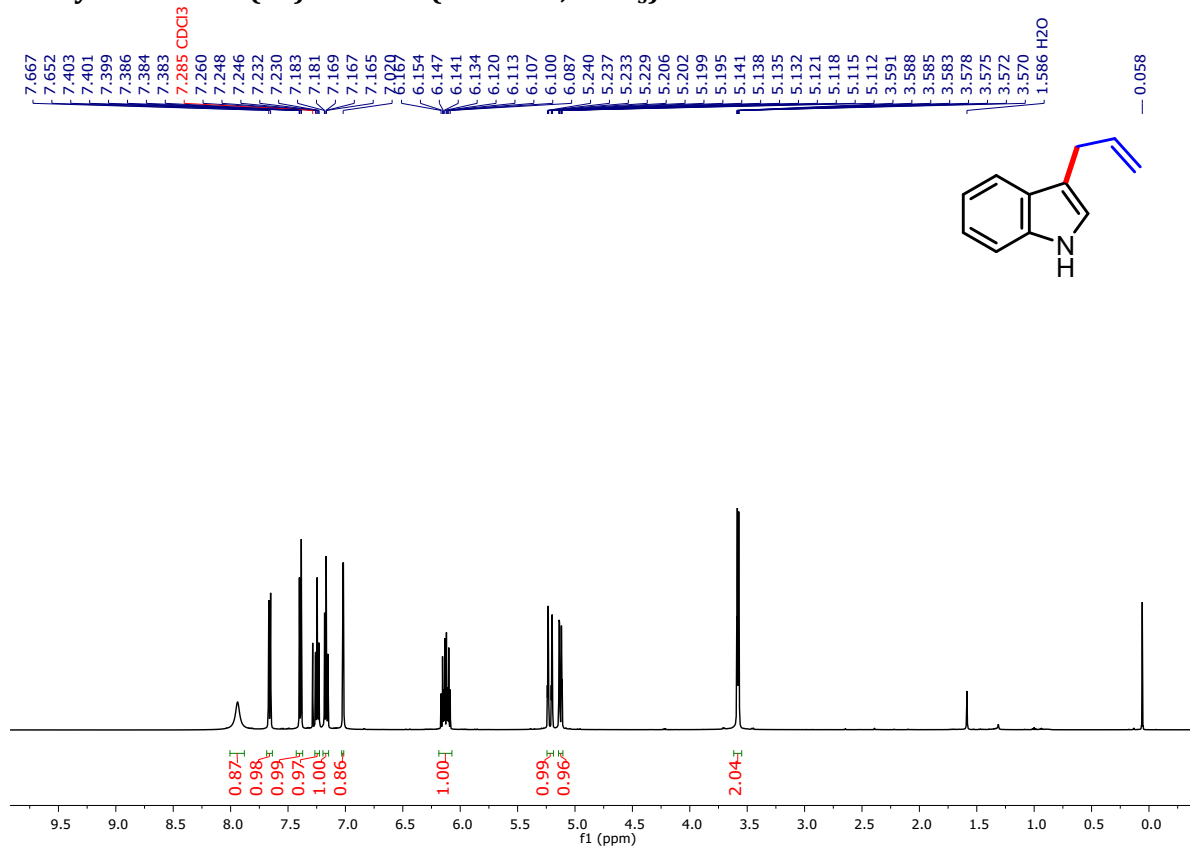

### 3-Allyl-1H-indole (3a): $^{13}\text{C}$ NMR (125 MHz, $\text{CDCl}_3$ )

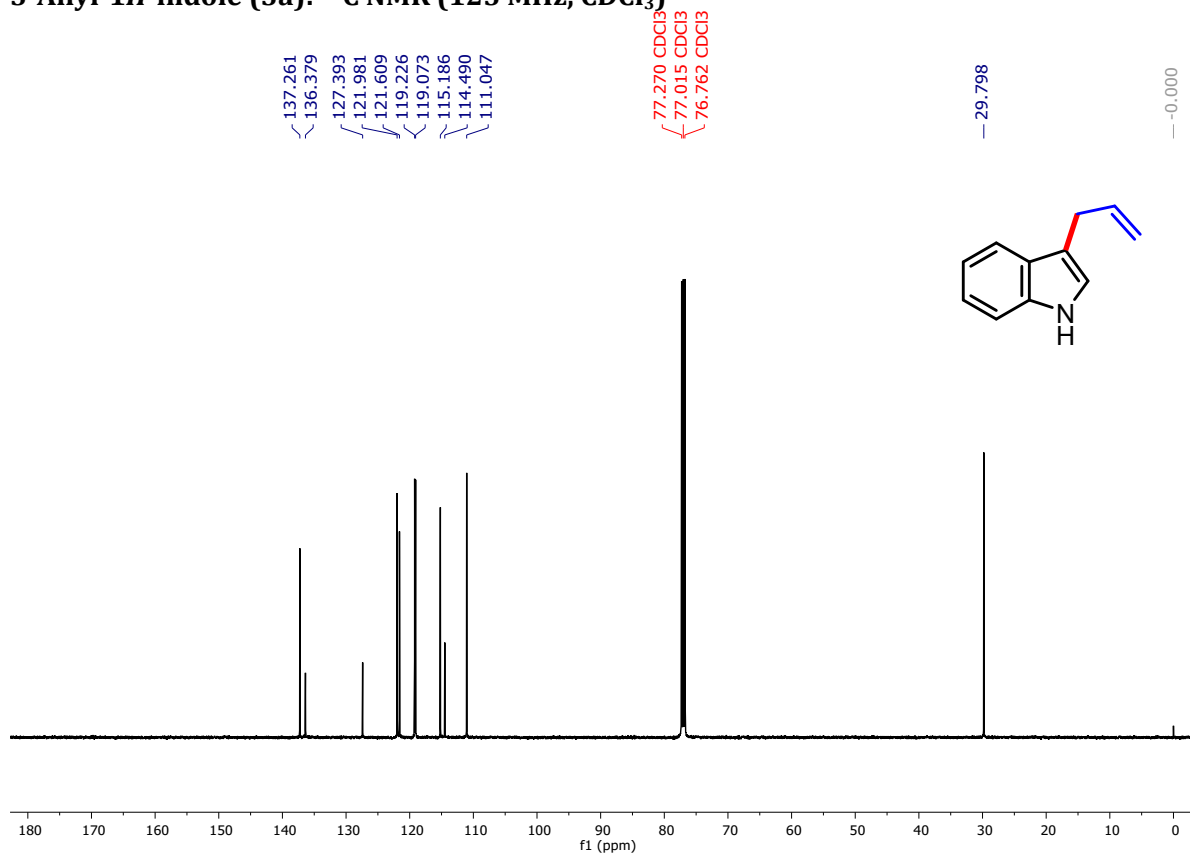



**3-Allyl-5-methyl-1H-indole (4a): <sup>1</sup>H NMR (500 MHz, CDCl<sub>3</sub>)**

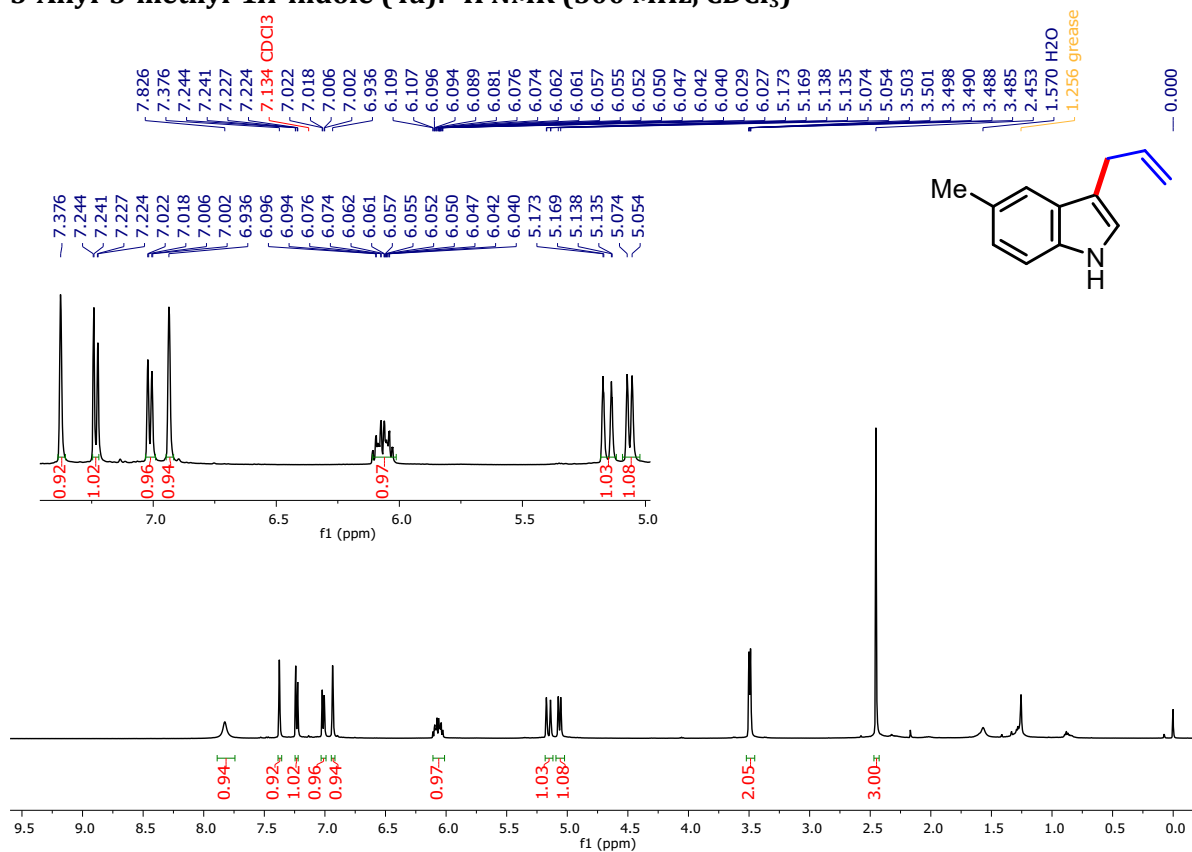

**3-Allyl-5-methyl-1H-indole (4a): <sup>13</sup>C NMR (125 MHz, CDCl<sub>3</sub>)**

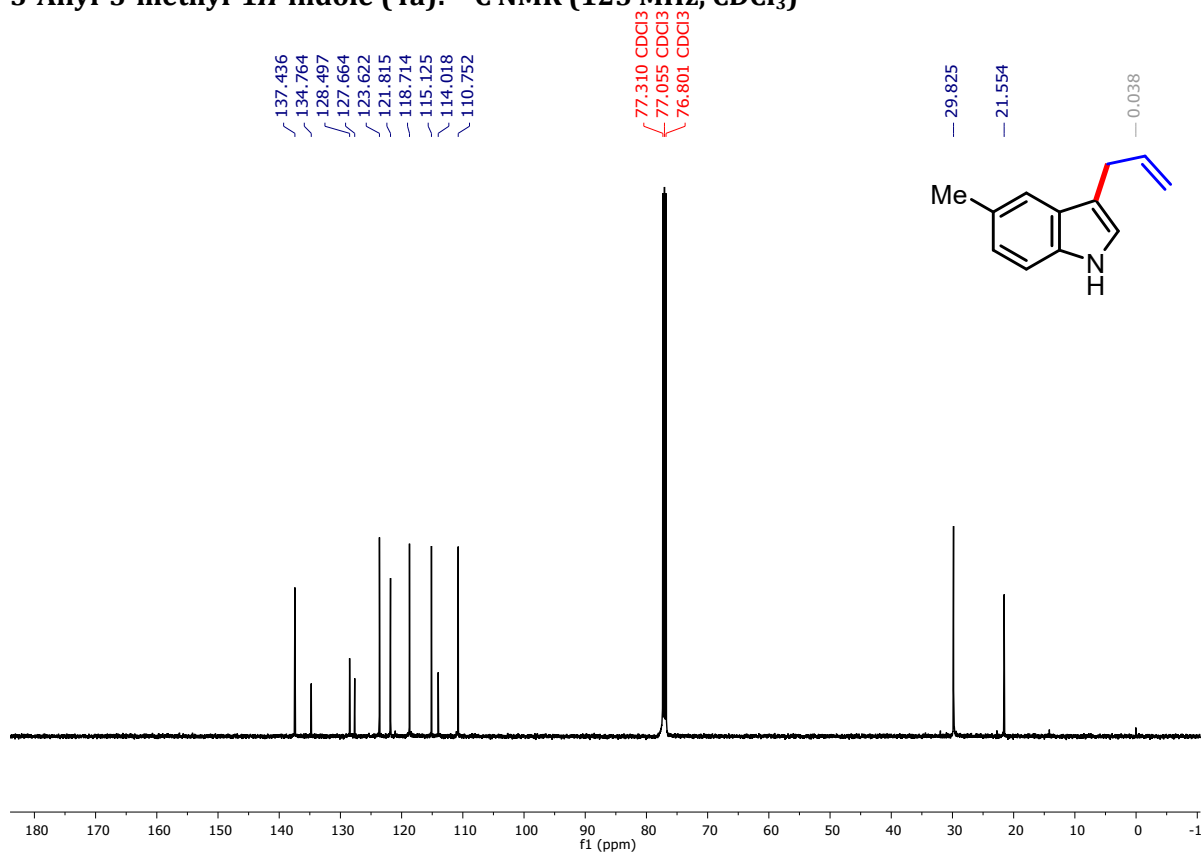

**3-Allyl-7-methyl-1H-indole (4b): <sup>1</sup>H NMR (500 MHz, CDCl<sub>3</sub>)**

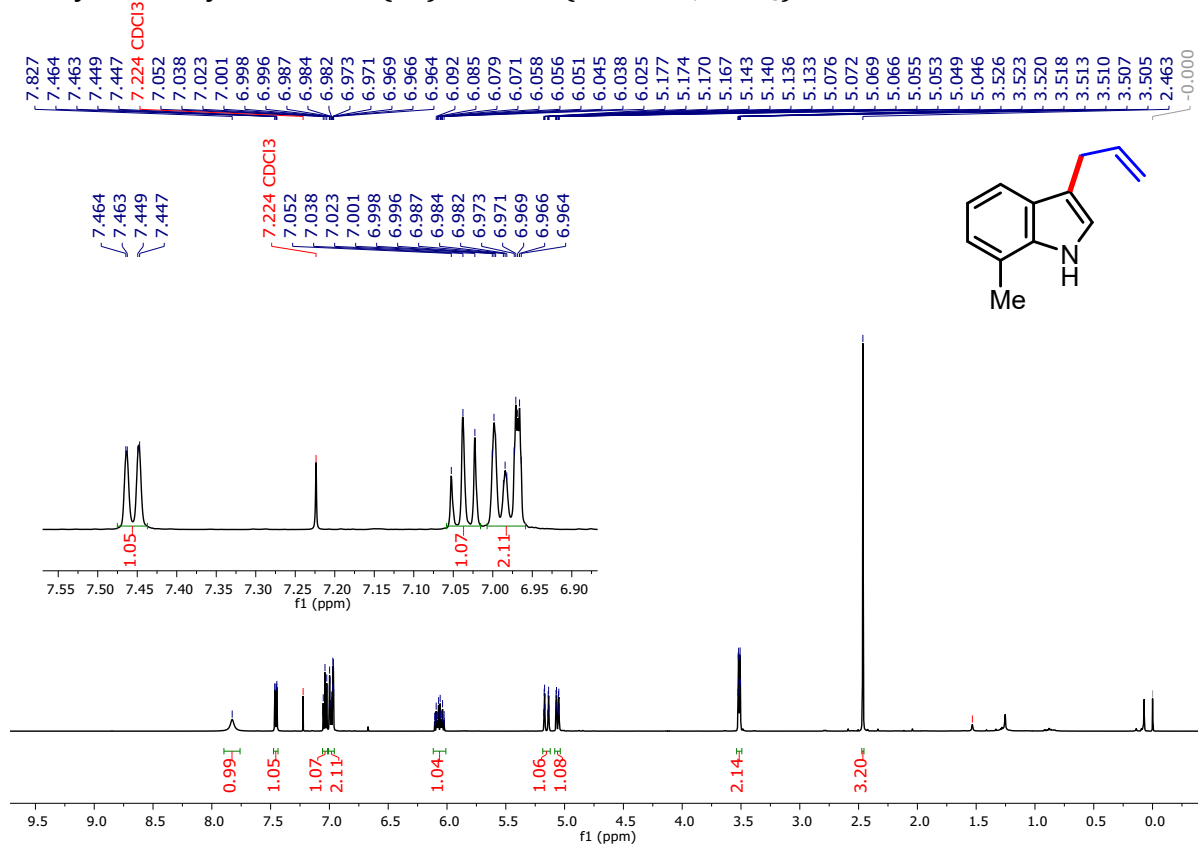

**3-Allyl-7-methyl-1H-indole (4b): <sup>13</sup>C NMR (125 MHz, CDCl<sub>3</sub>)**

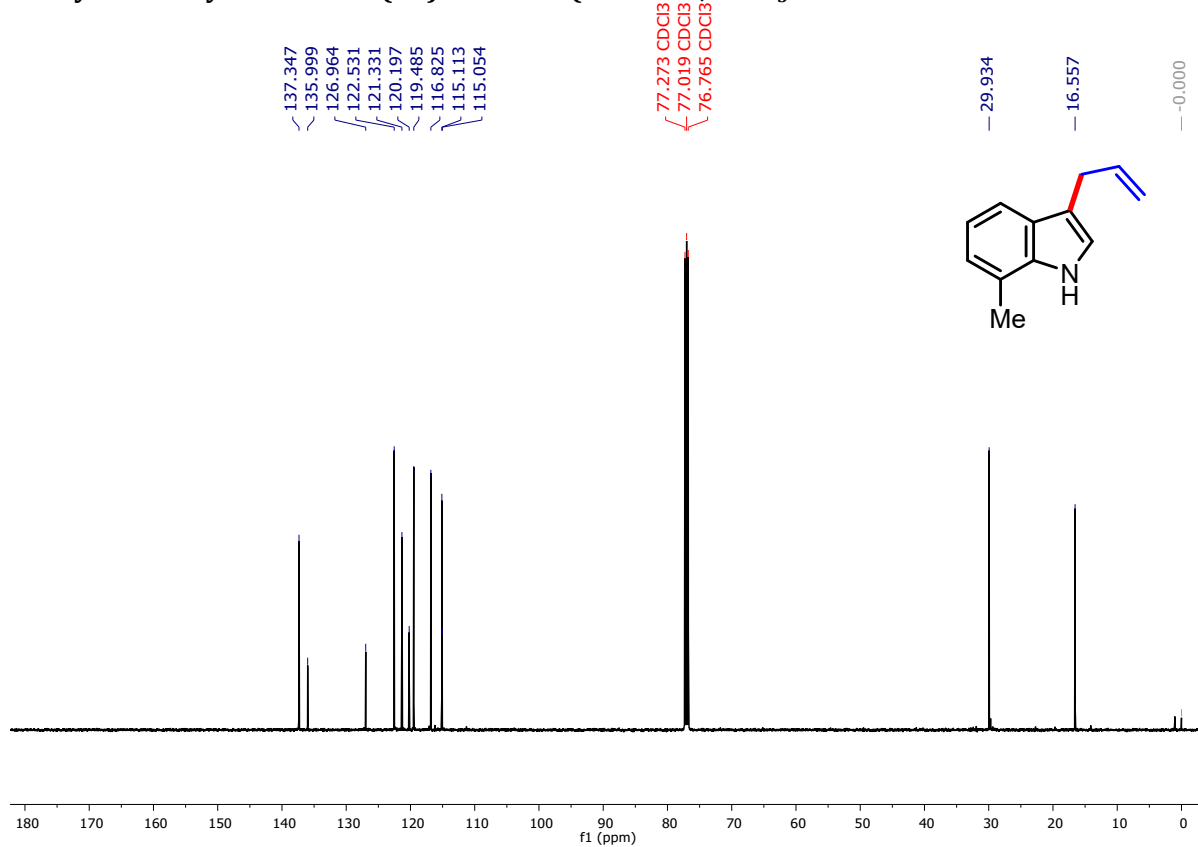

**3-Allyl-5-fluoro-1H-indole (4c): <sup>1</sup>H NMR (500 MHz, CDCl<sub>3</sub>)**

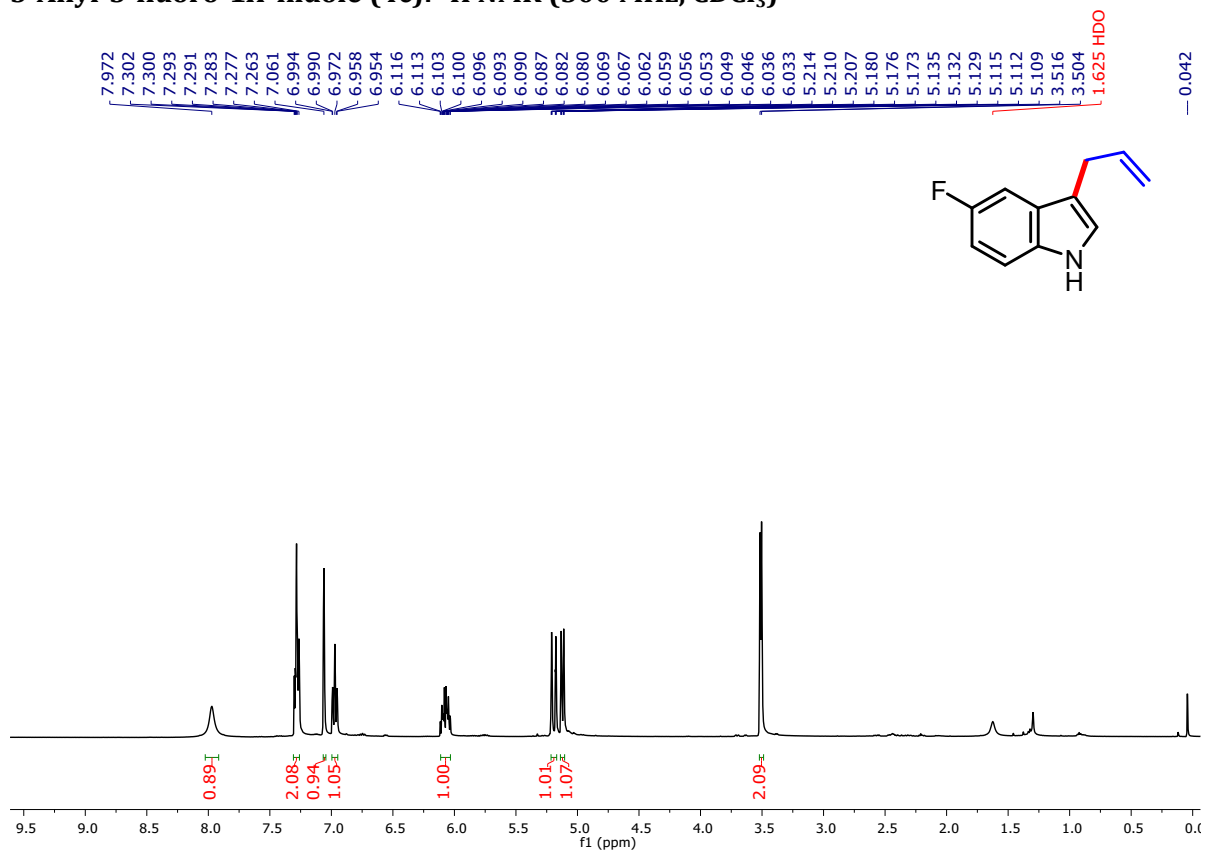

**3-Allyl-5-fluoro-1H-indole (4c): <sup>13</sup>C NMR (125 MHz, CDCl<sub>3</sub>)**

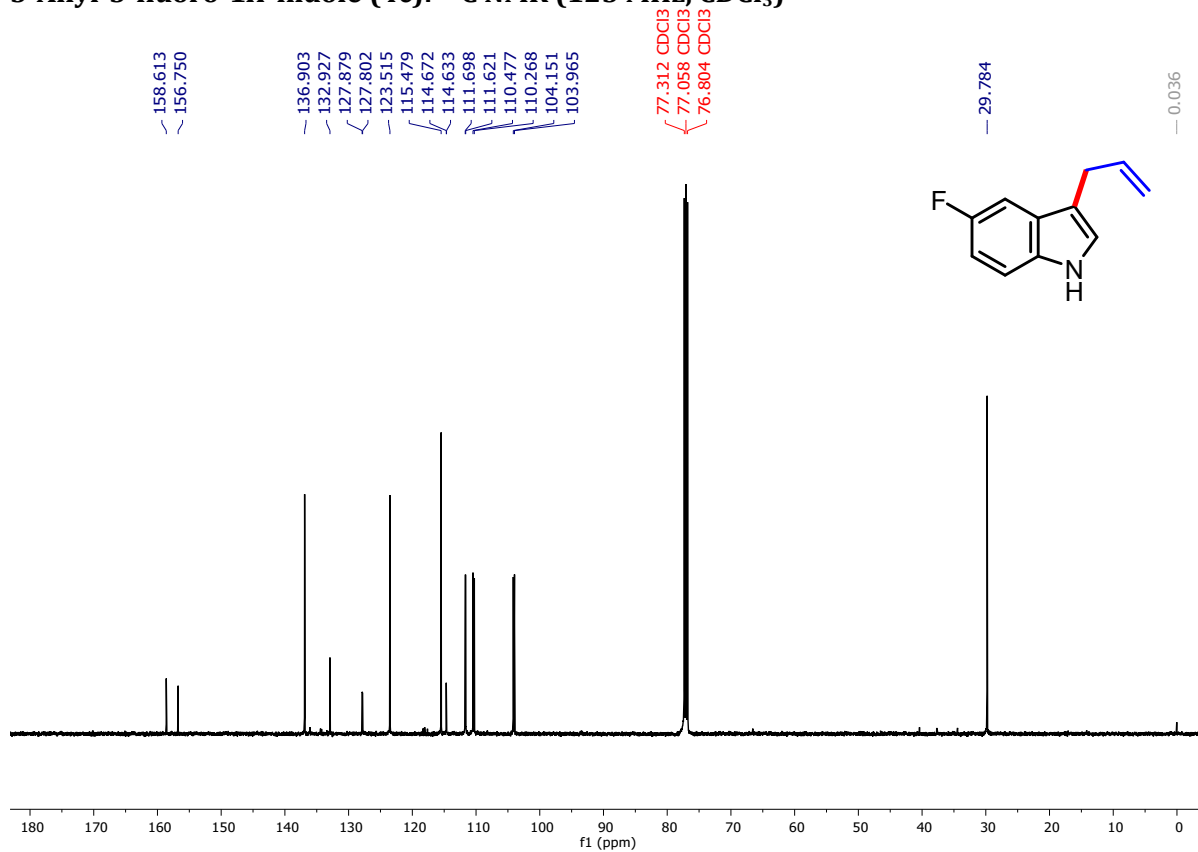

3-Allyl-5-fluoro-1H-indole (4c):  $^{19}\text{F}$  NMR (471 MHz,  $\text{CDCl}_3$ )

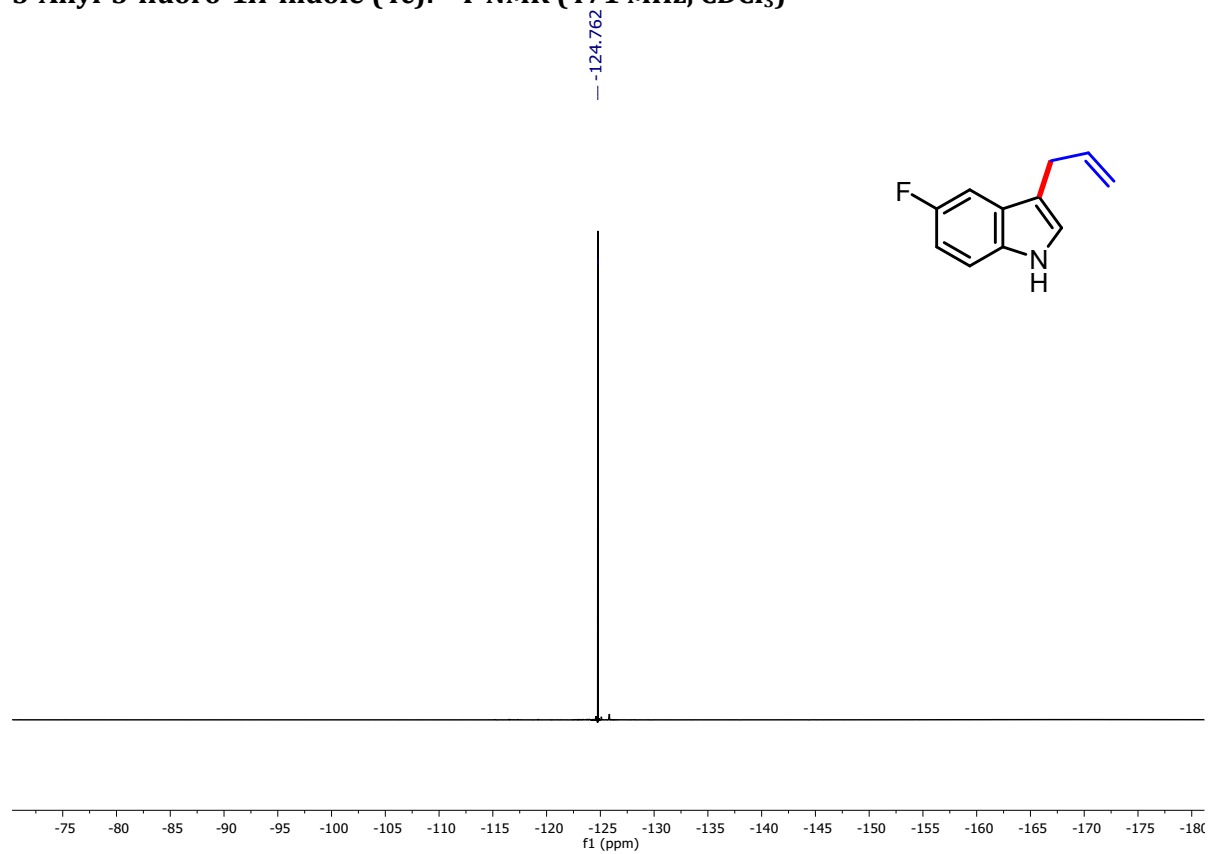

**3-Allyl-4-bromo-1H-indole (4d): <sup>1</sup>H NMR (500 MHz, CDCl<sub>3</sub>)**

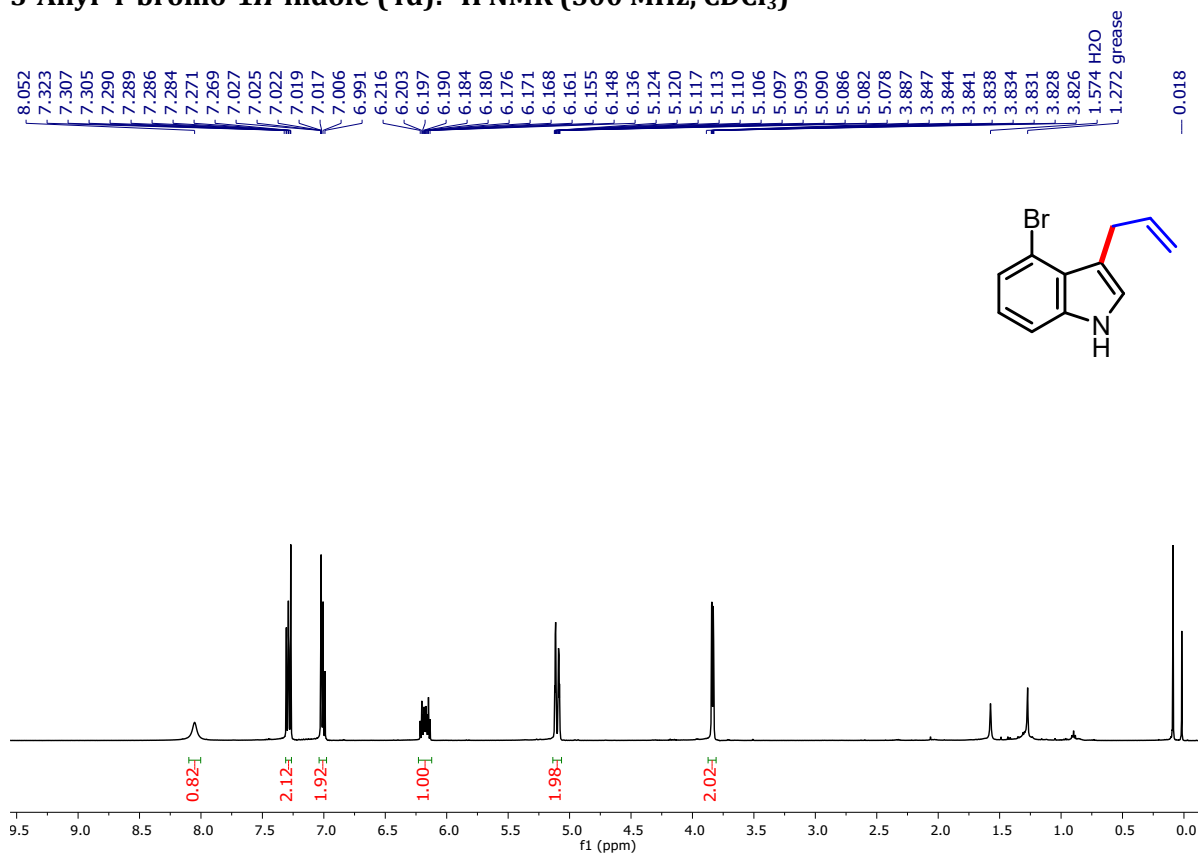

**3-Allyl-4-bromo-1H-indole (4d): <sup>13</sup>C NMR (125 MHz, CDCl<sub>3</sub>)**

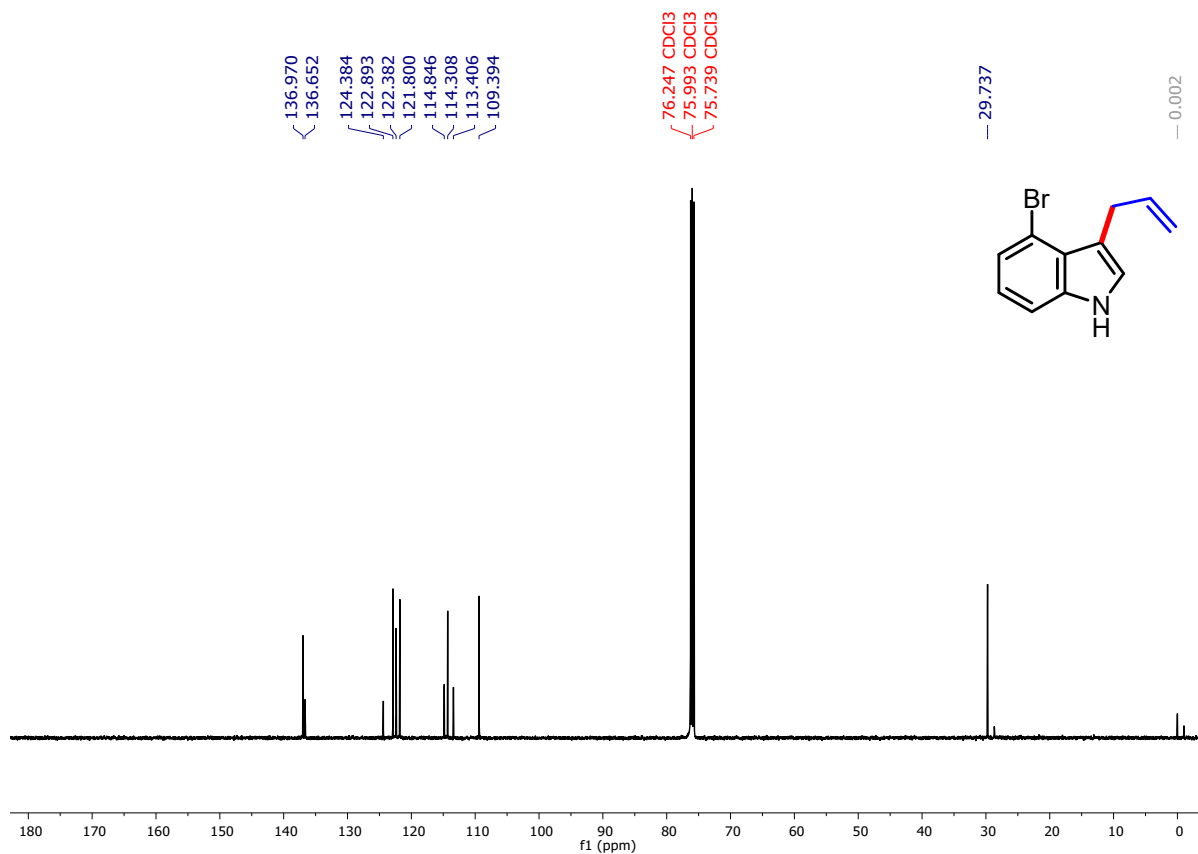

### 3-Allyl-6-chloro-5-fluoro-1H-indole (4e): <sup>1</sup>H NMR (500 MHz, CDCl<sub>3</sub>)

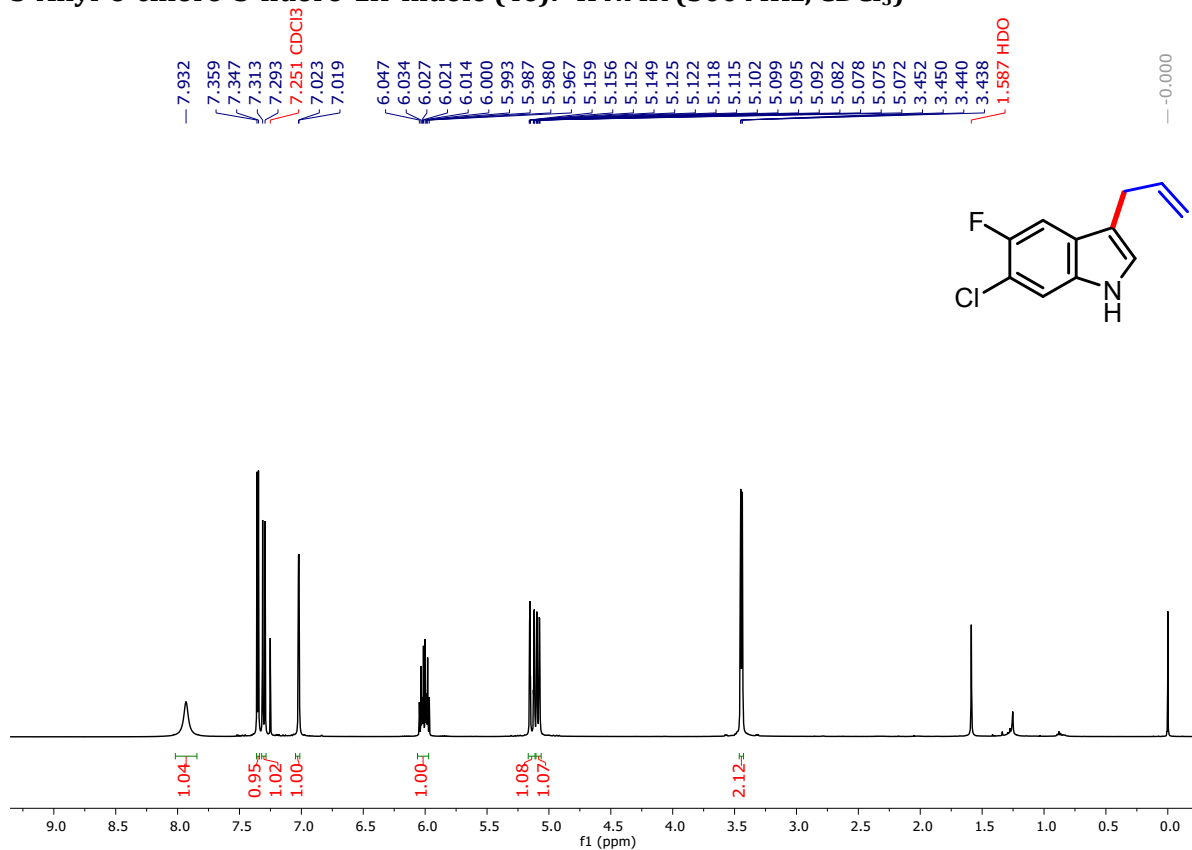

### 3-Allyl-6-chloro-5-fluoro-1H-indole (4e): <sup>13</sup>C NMR (125 MHz, CDCl<sub>3</sub>)

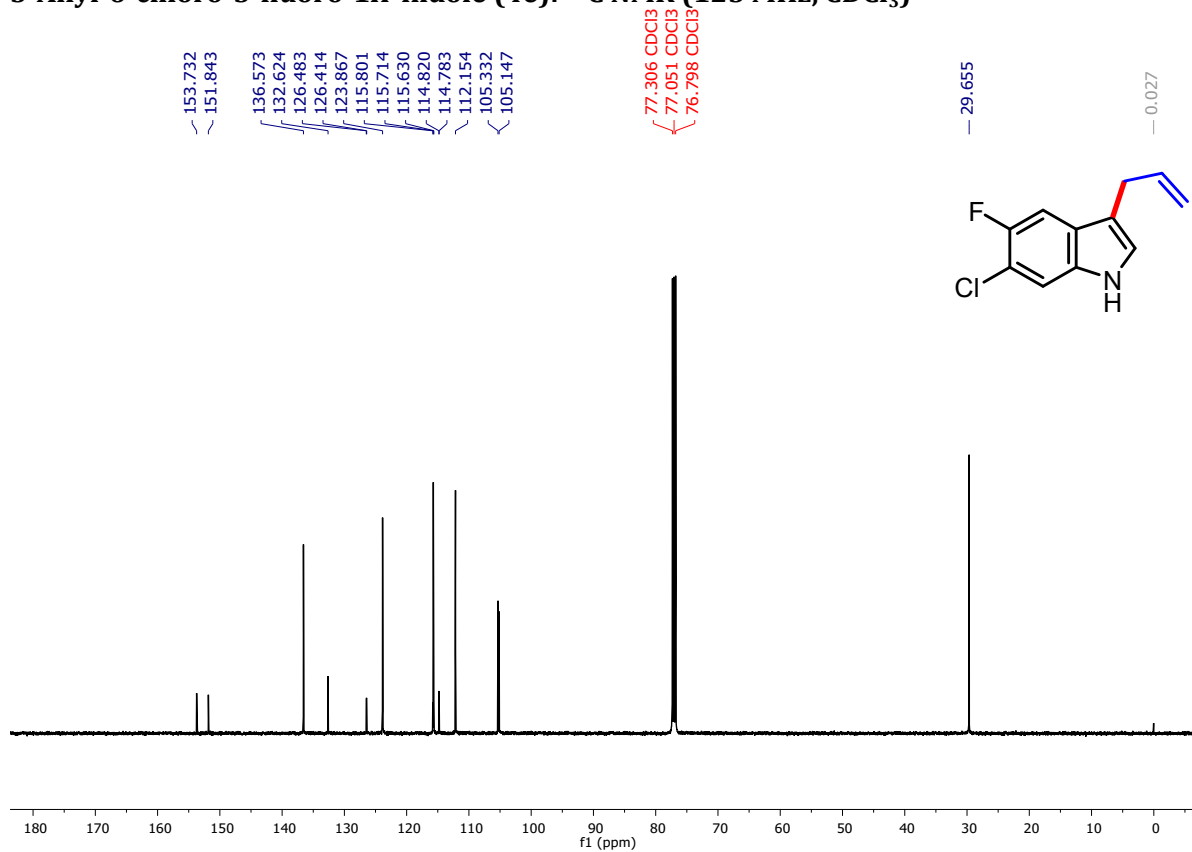

**3-Allyl-6-chloro-5-fluoro-1H-indole (4e):  $^{19}\text{F}$  NMR (471 MHz,  $\text{CDCl}_3$ )**

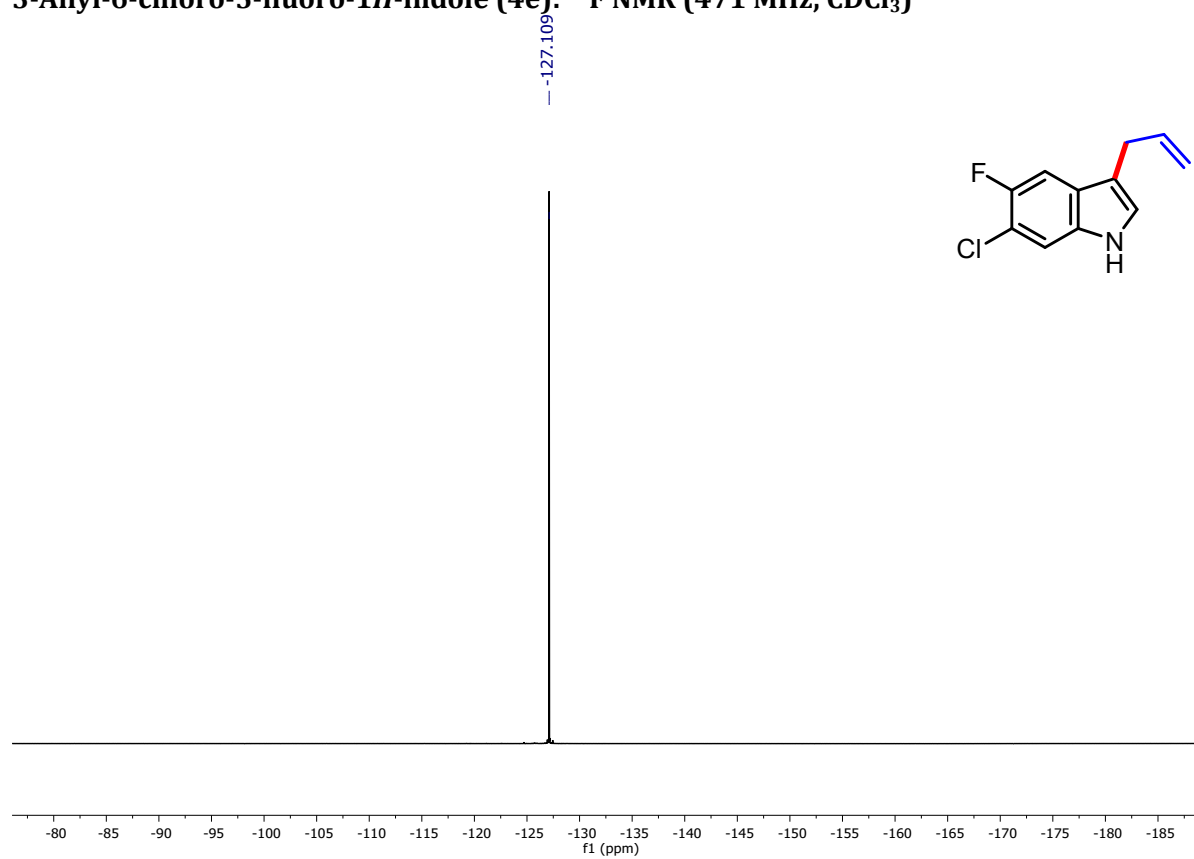

**3-Allyl-5-methoxy-1H-indole (4f): <sup>1</sup>H NMR (500 MHz, CDCl<sub>3</sub>)**

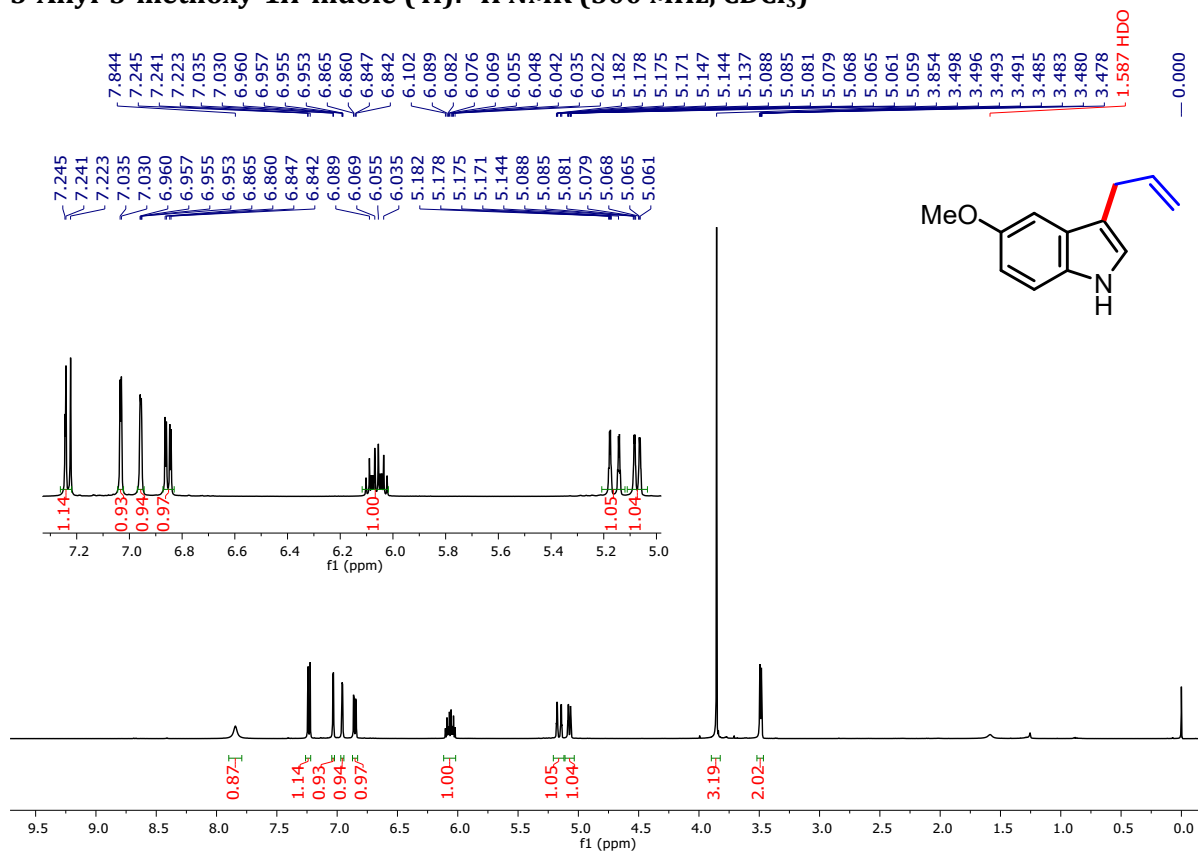

**3-Allyl-5-methoxy-1H-indole (4f): <sup>13</sup>C NMR (125 MHz, CDCl<sub>3</sub>)**

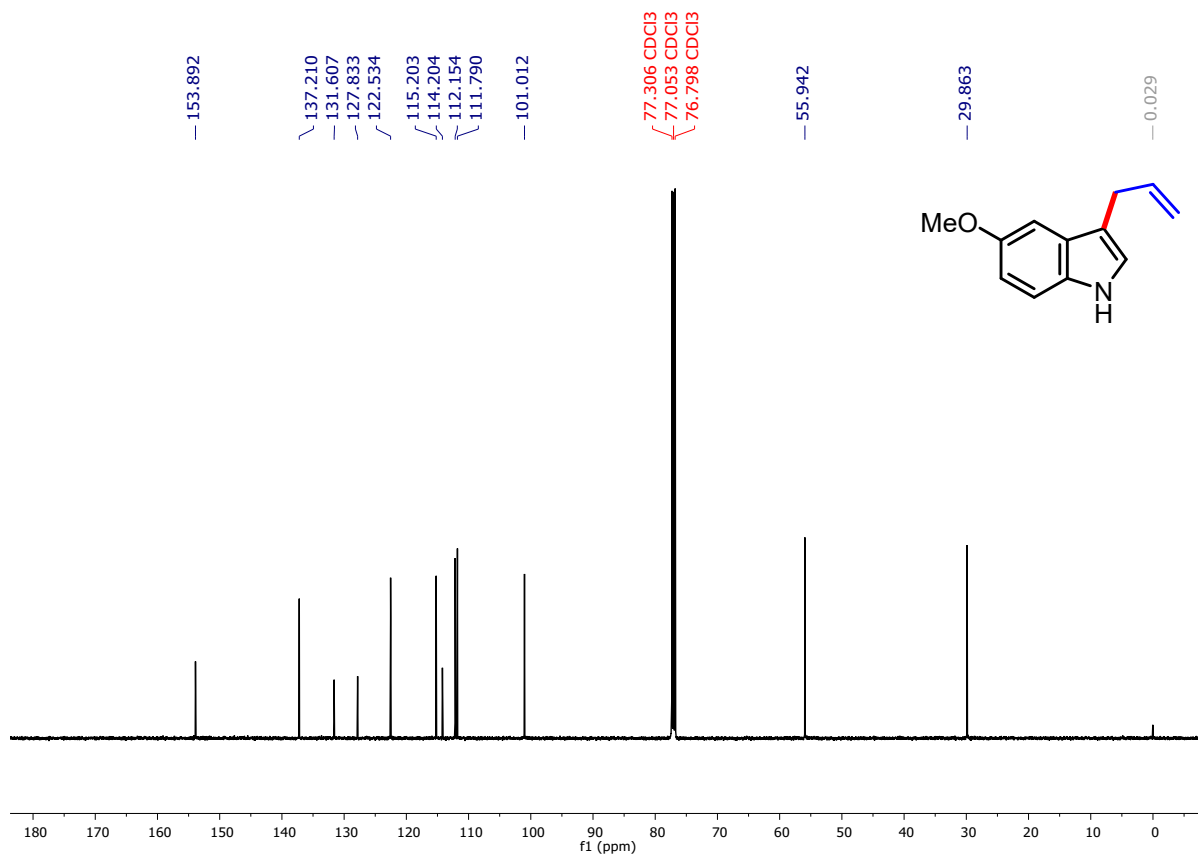



### 3-Allyl-5-(benzyloxy)-1H-indole (4g): <sup>1</sup>H NMR (500 MHz, CDCl<sub>3</sub>)

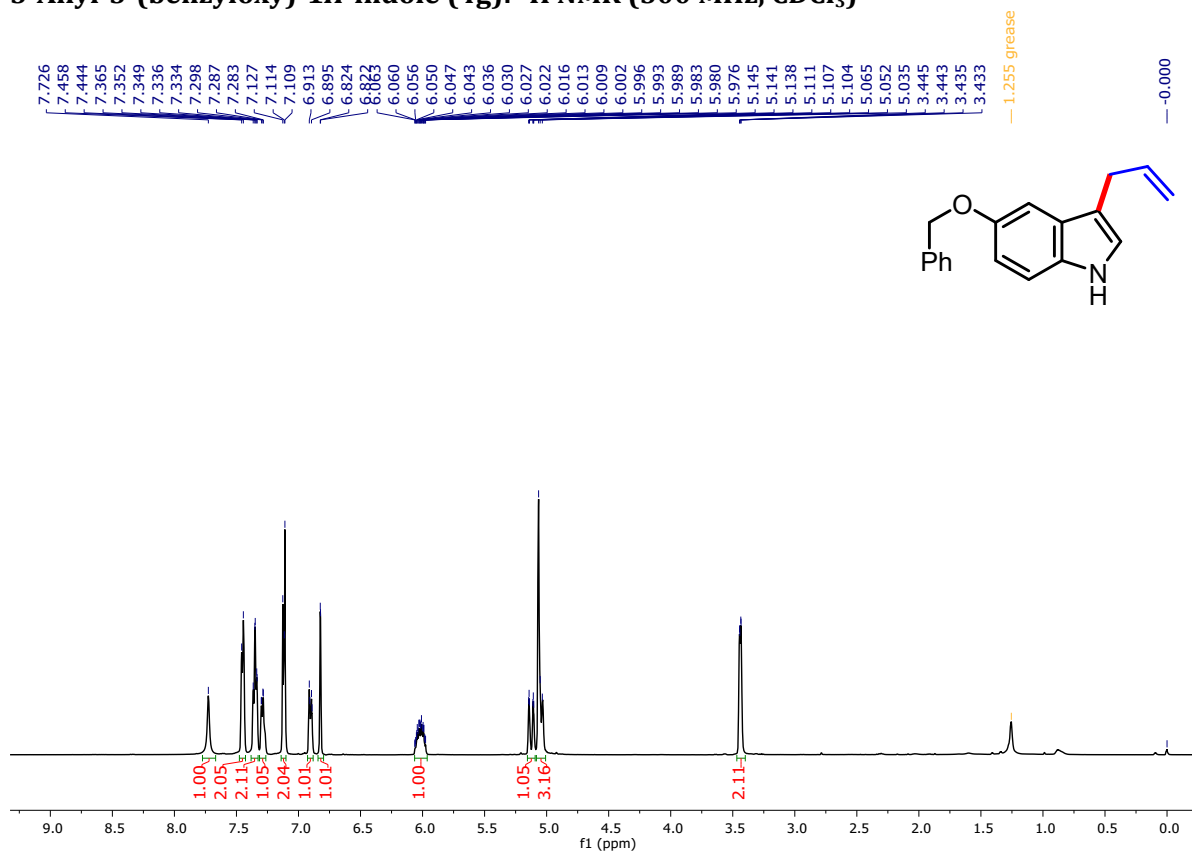

### 3-Allyl-5-(benzyloxy)-1H-indole (4g): <sup>13</sup>C NMR (125 MHz, CDCl<sub>3</sub>)

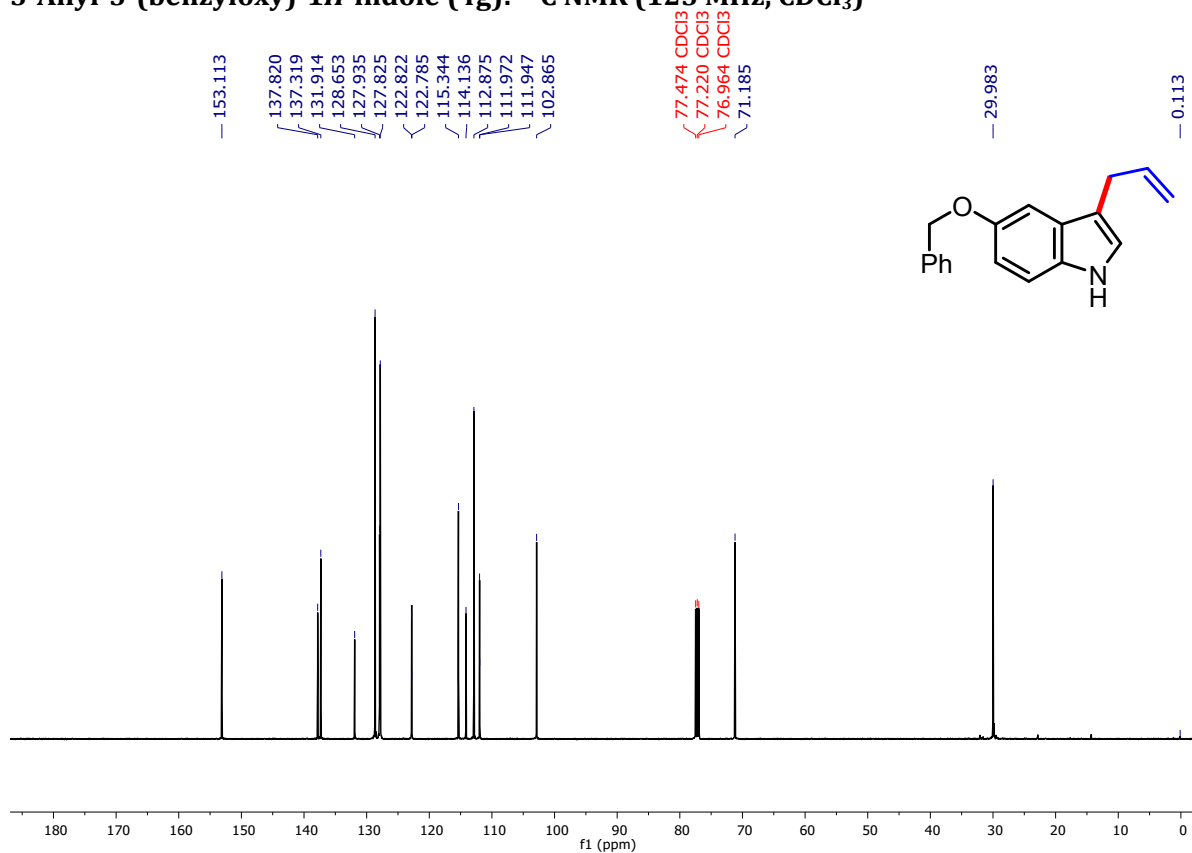

### 3-Allyl-1H-indol-5-ol (4h): <sup>1</sup>H NMR (500 MHz, CDCl<sub>3</sub>)

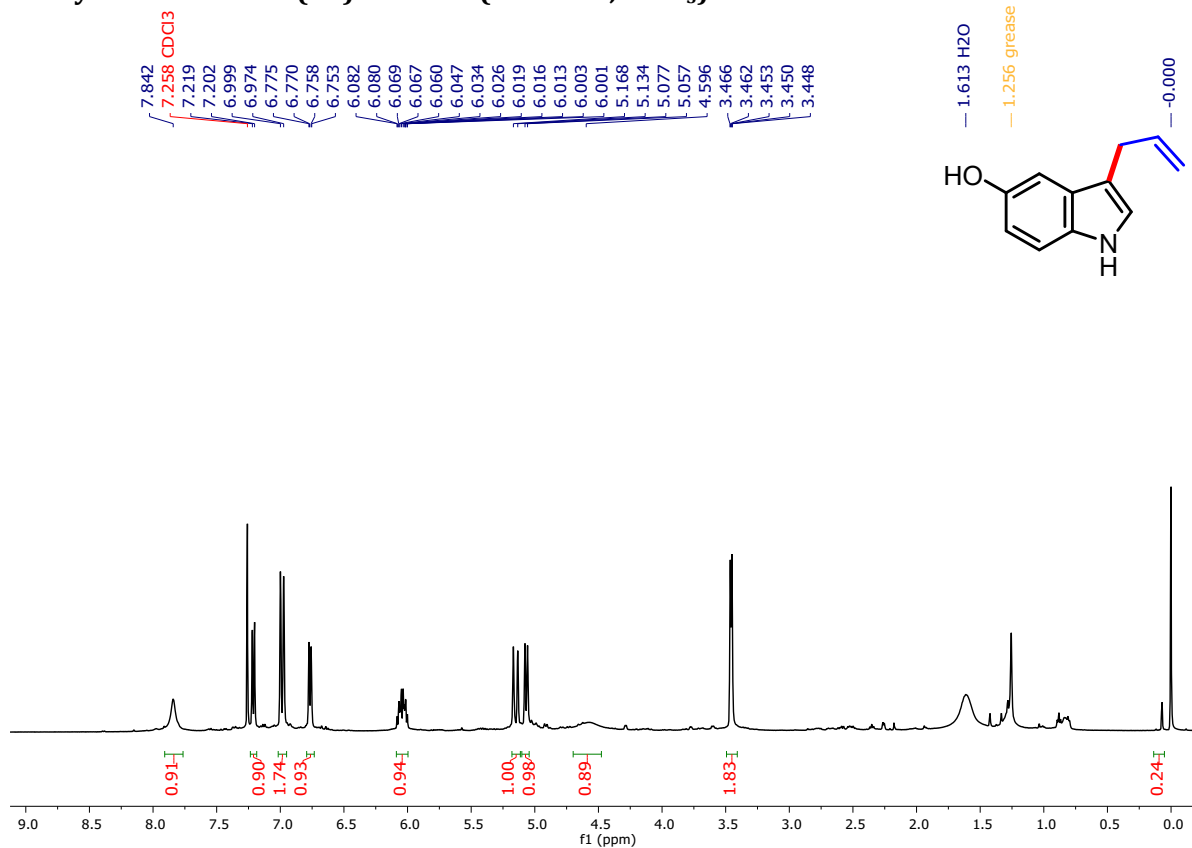

### 3-Allyl-1H-indol-5-ol (4h): <sup>13</sup>C NMR (125 MHz, CDCl<sub>3</sub>)

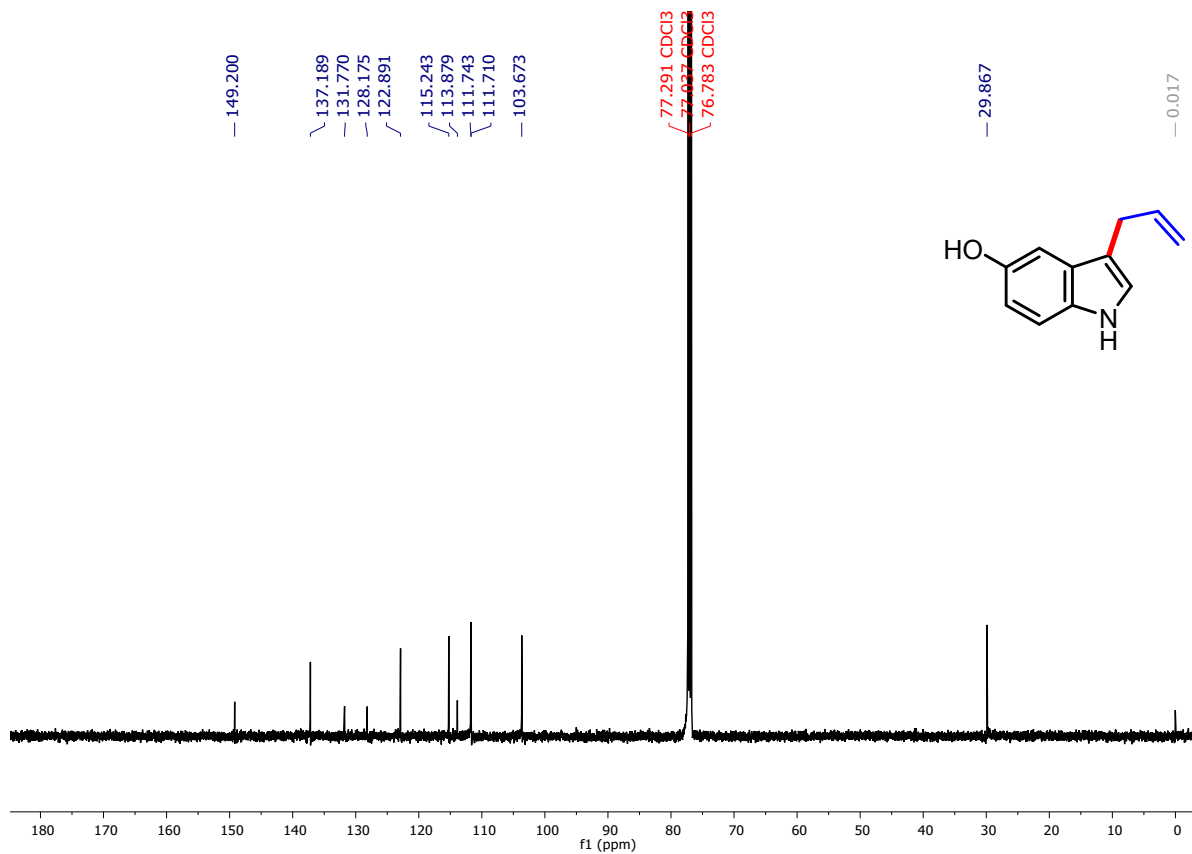

***N*,3-Diallyl-1*H*-indol-5-amine (4i): <sup>1</sup>H NMR (500 MHz, CDCl<sub>3</sub>)**

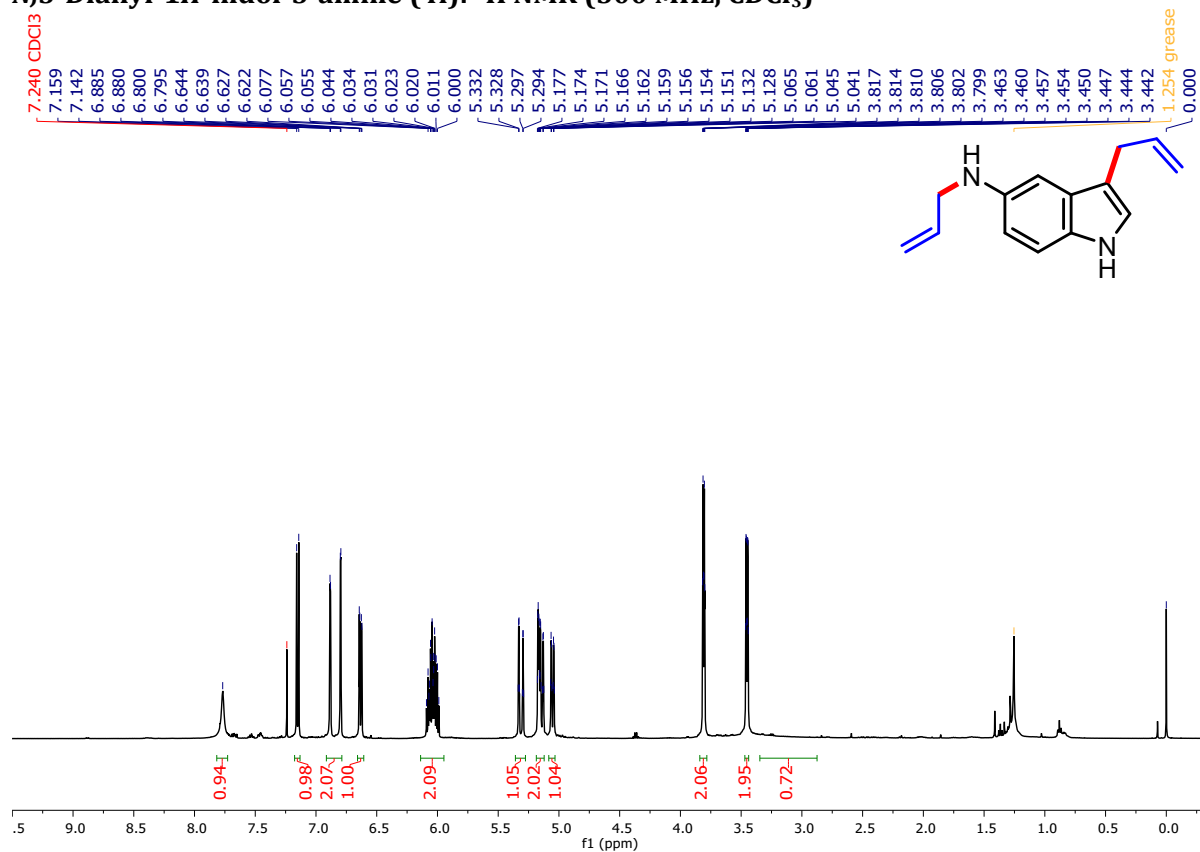

***N*,3-Diallyl-1*H*-indol-5-amine (4i): <sup>13</sup>C NMR (125 MHz, CDCl<sub>3</sub>)**

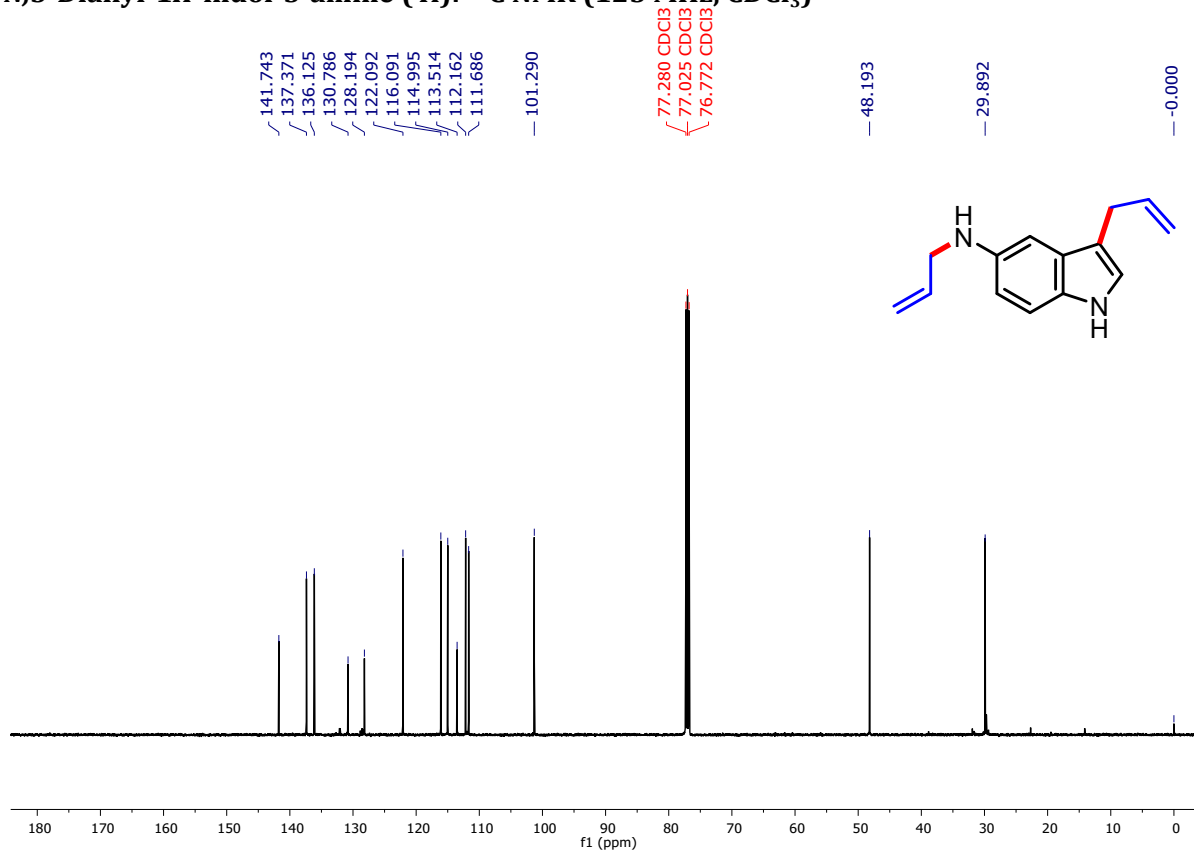





**Allyl-2-methyl-1H-indole (4l): <sup>1</sup>H NMR (500 MHz, CDCl<sub>3</sub>)**

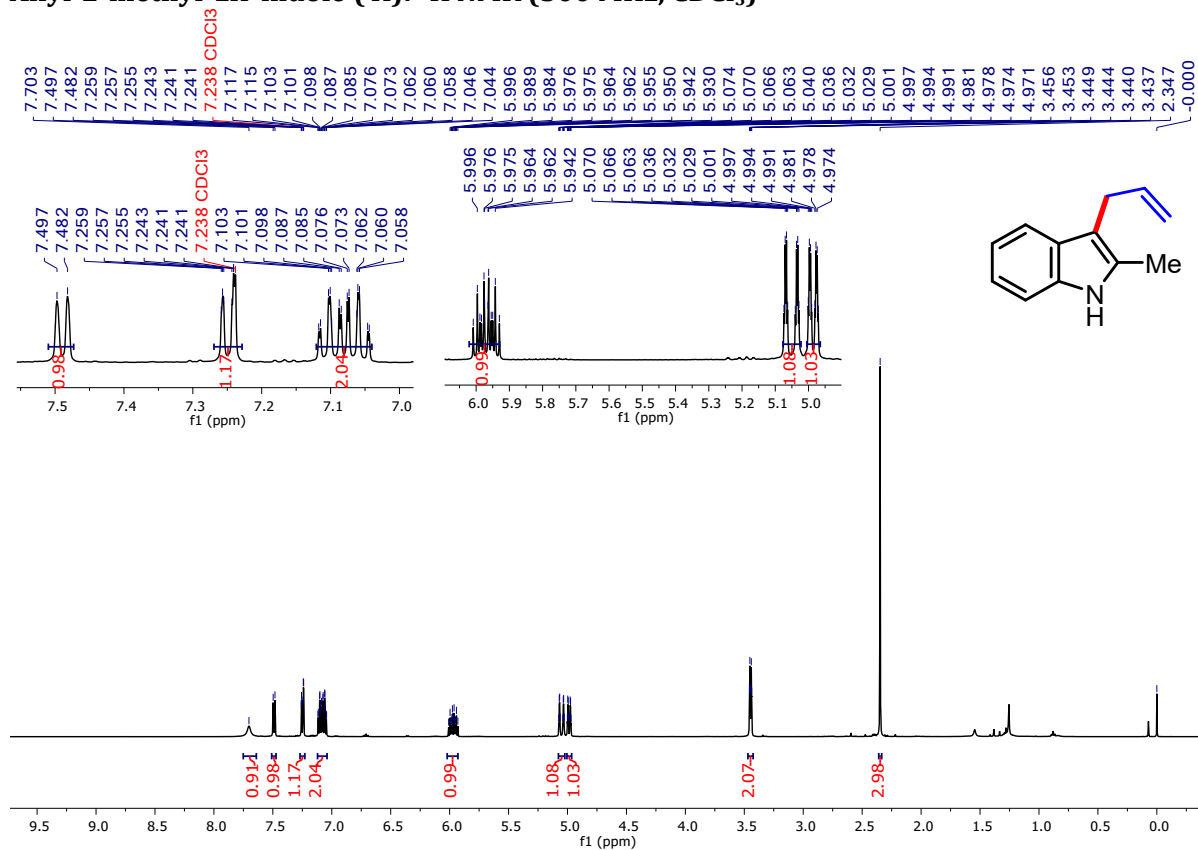

**3-Allyl-2-methyl-1H-indole (4l): <sup>13</sup>C NMR (125 MHz, CDCl<sub>3</sub>)**

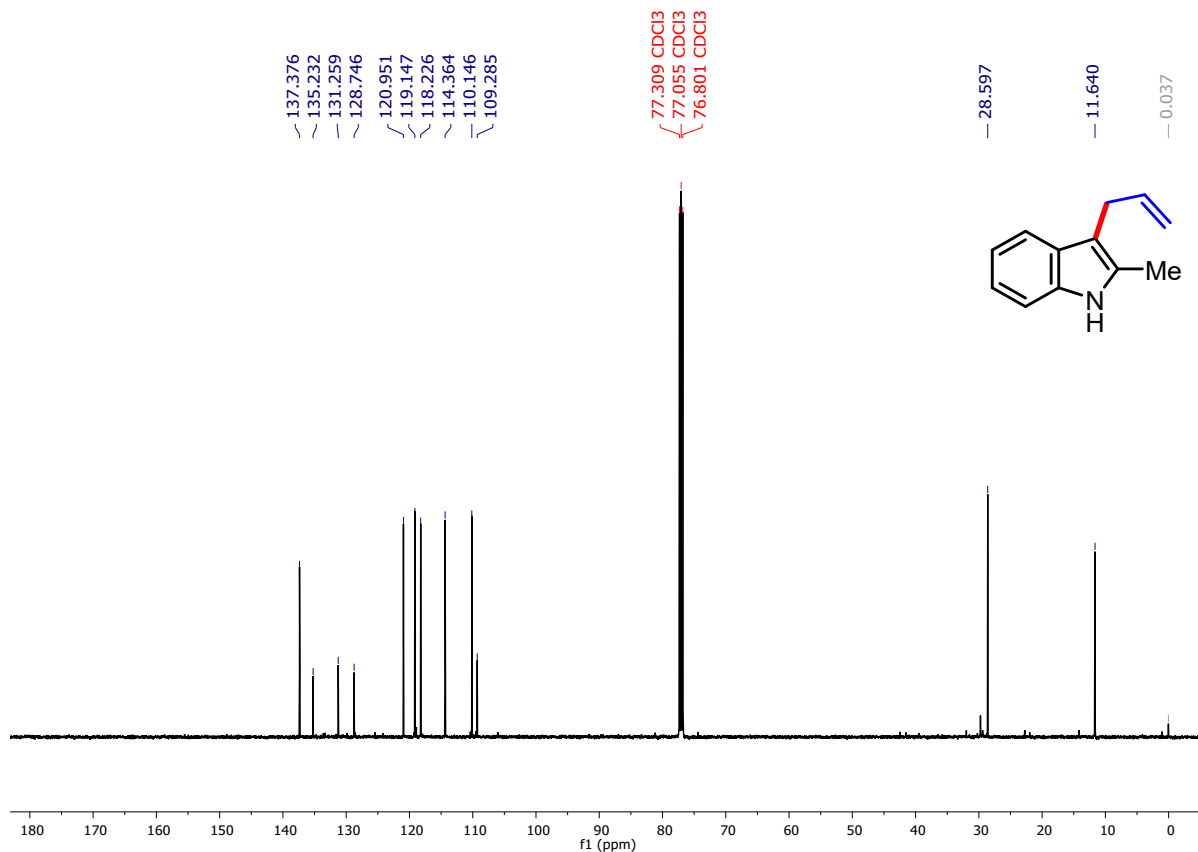

**3-Allyl-2-phenyl-1H-indole (4m): <sup>1</sup>H NMR (500 MHz, CDCl<sub>3</sub>)**

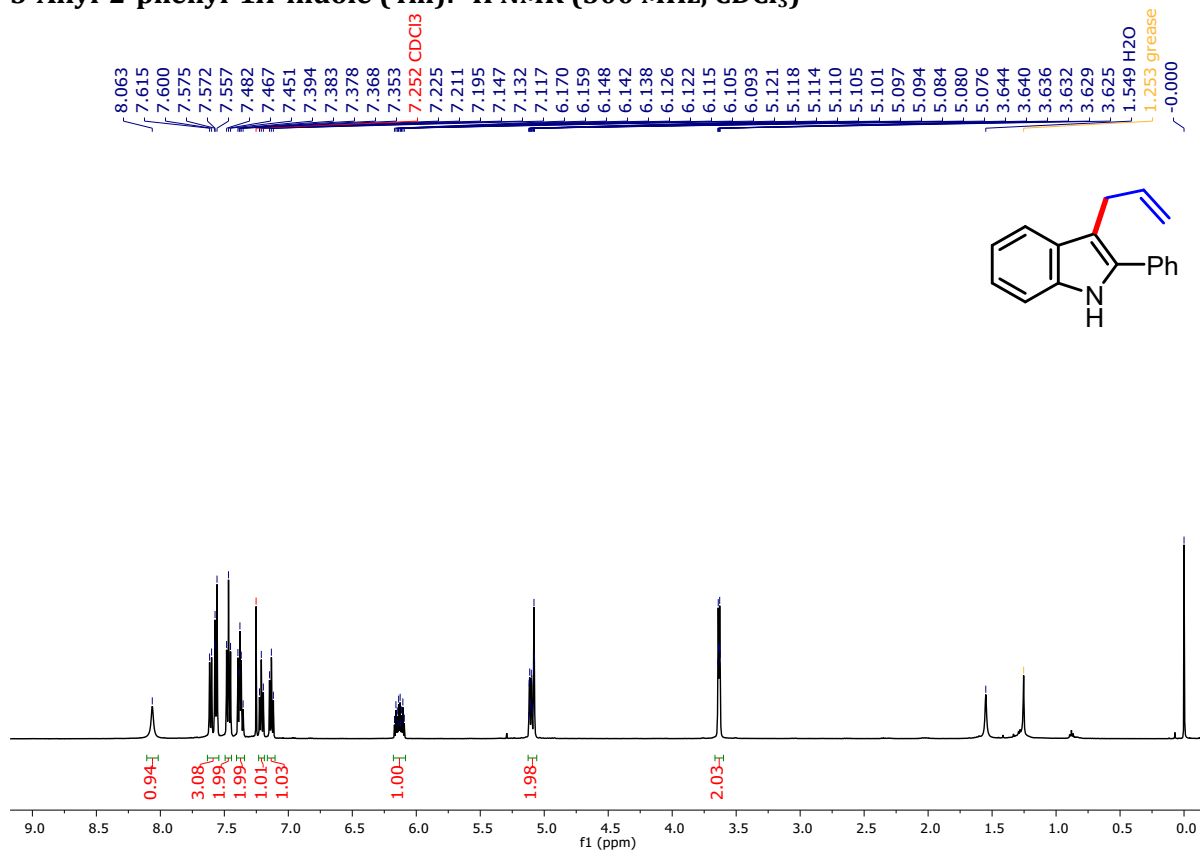

**3-Allyl-2-phenyl-1H-indole (4m): <sup>13</sup>C NMR (125 MHz, CDCl<sub>3</sub>)**

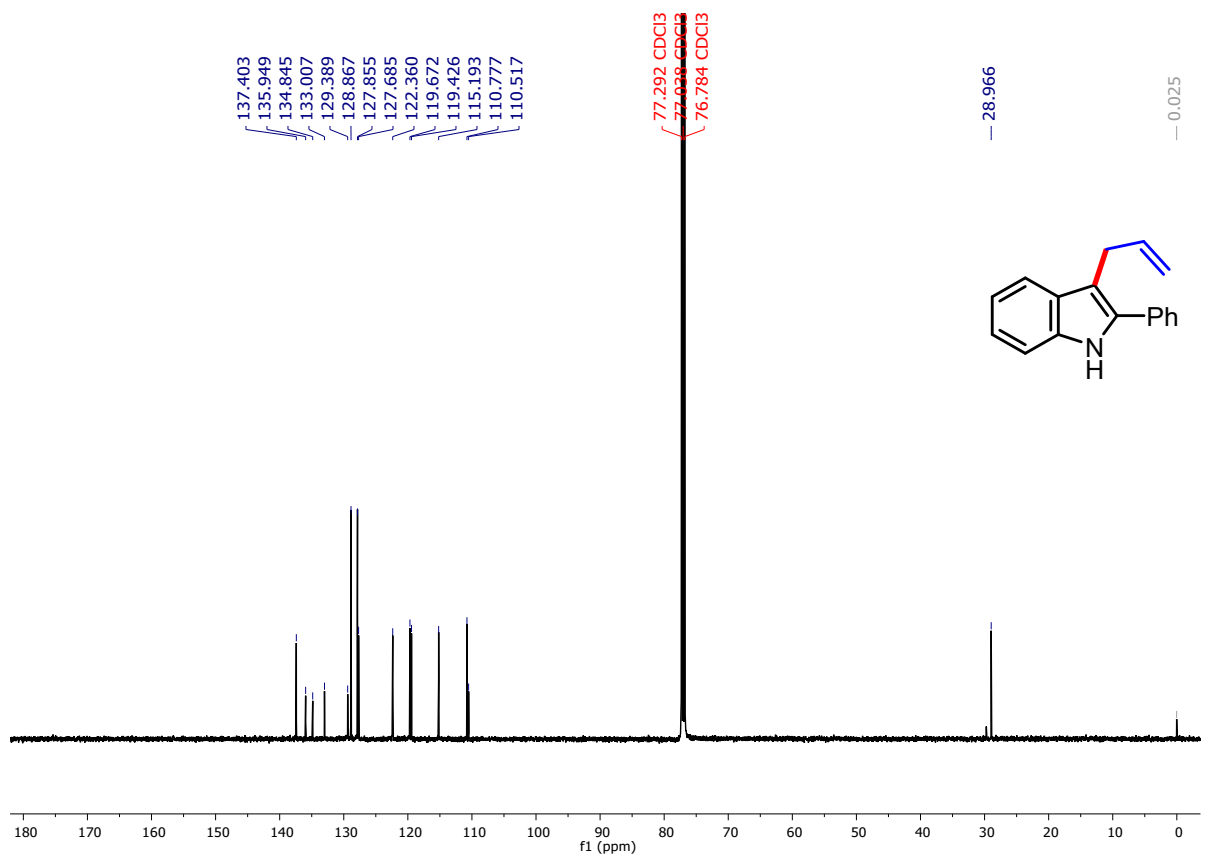



**3-(But-2-en-1-yl)-3H-indole (5a): <sup>1</sup>H NMR (500 MHz, CDCl<sub>3</sub>)**

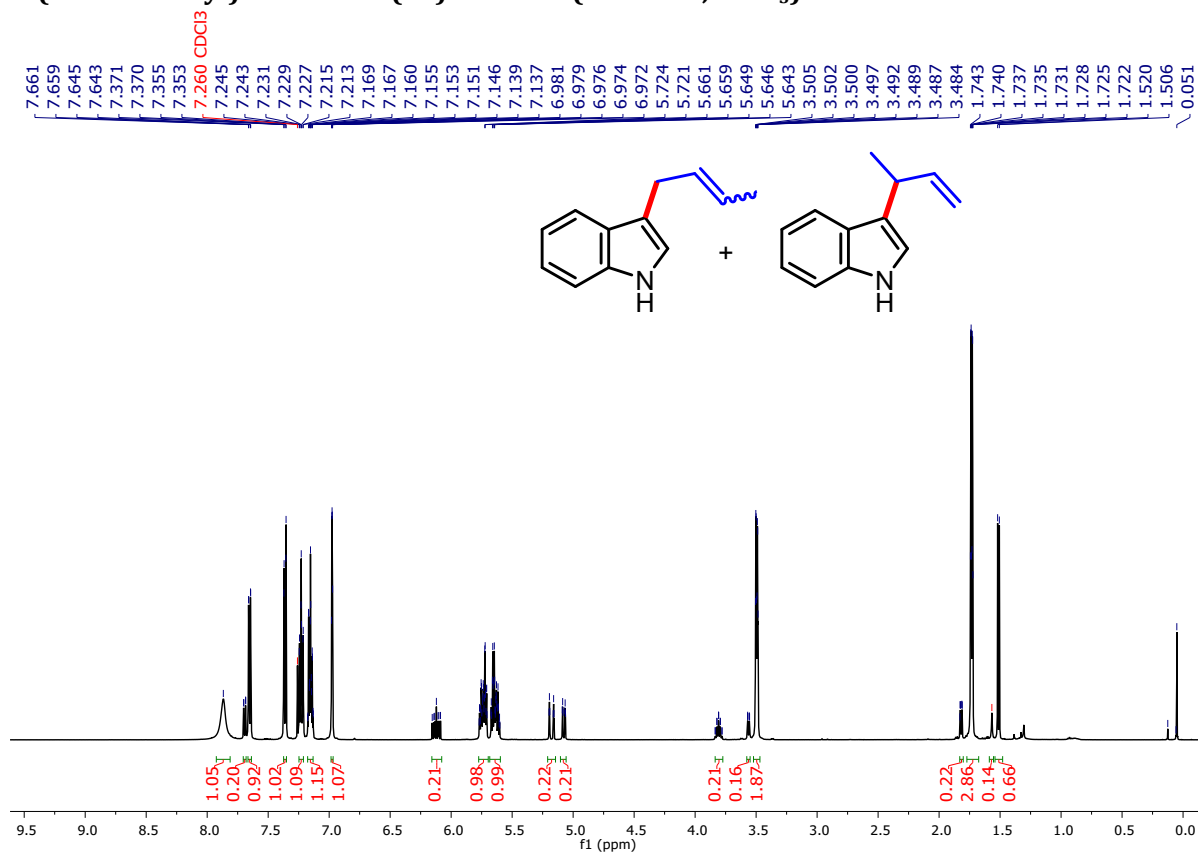

**3-(But-2-en-1-yl)-3H-indole (5a): <sup>13</sup>C NMR (125 MHz, CDCl<sub>3</sub>)**

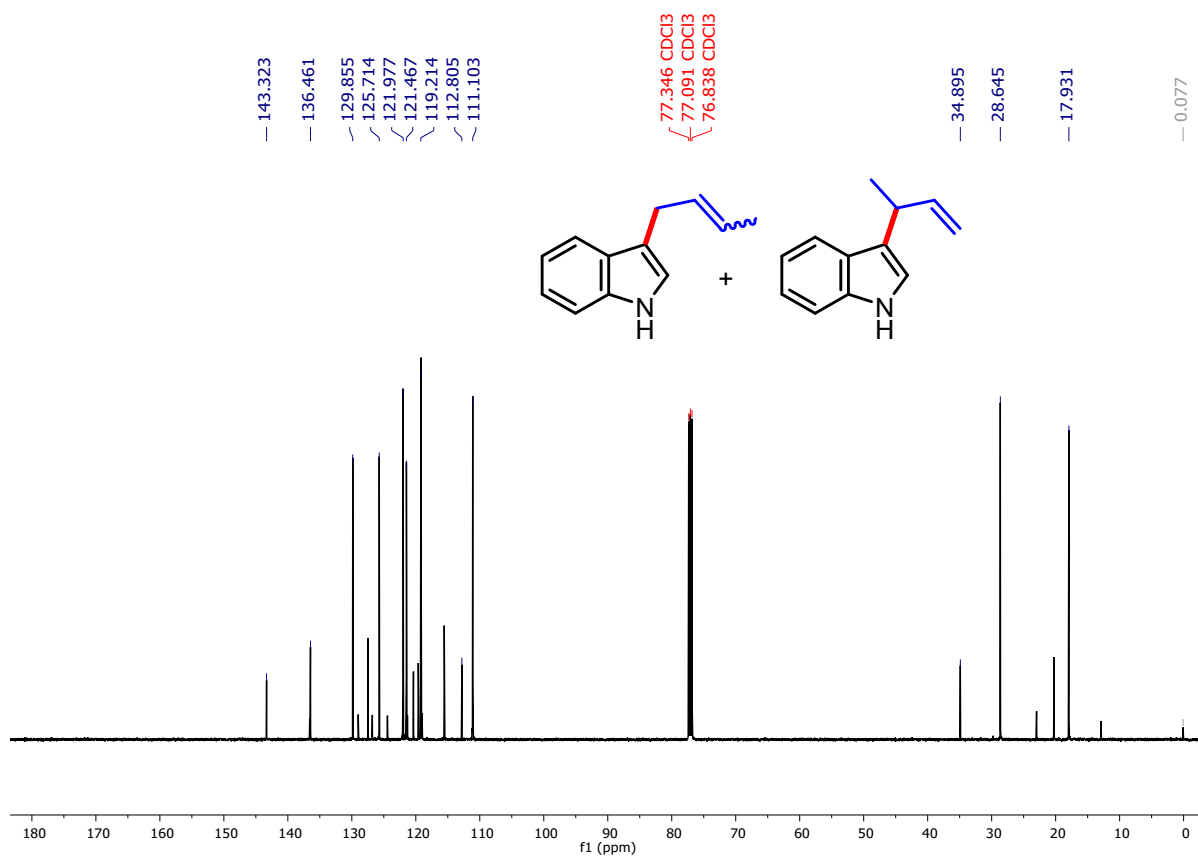

**3-(2-Methylallyl)-3H-indole (5b): <sup>1</sup>H NMR (500 MHz, CDCl<sub>3</sub>)**

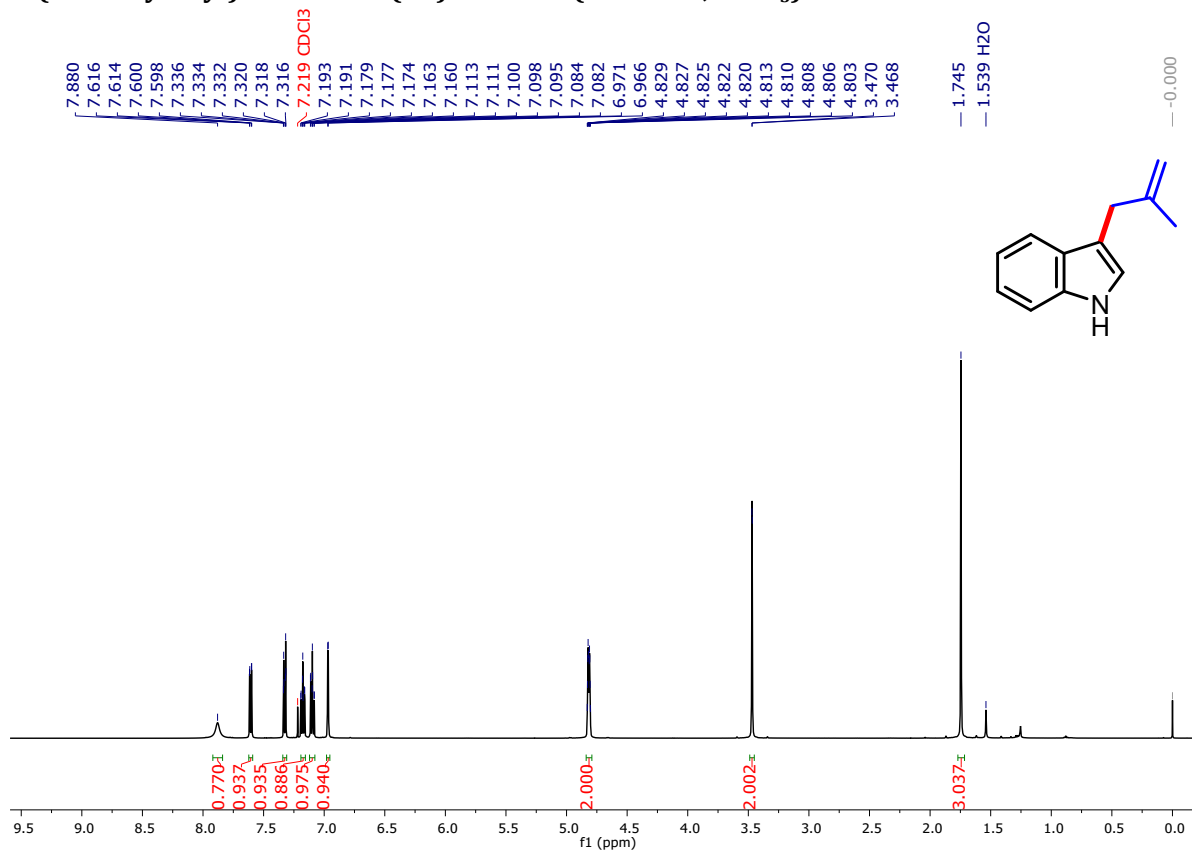

**3-(2-Methylallyl)-3H-indole (5b): <sup>13</sup>C NMR (125 MHz, CDCl<sub>3</sub>)**

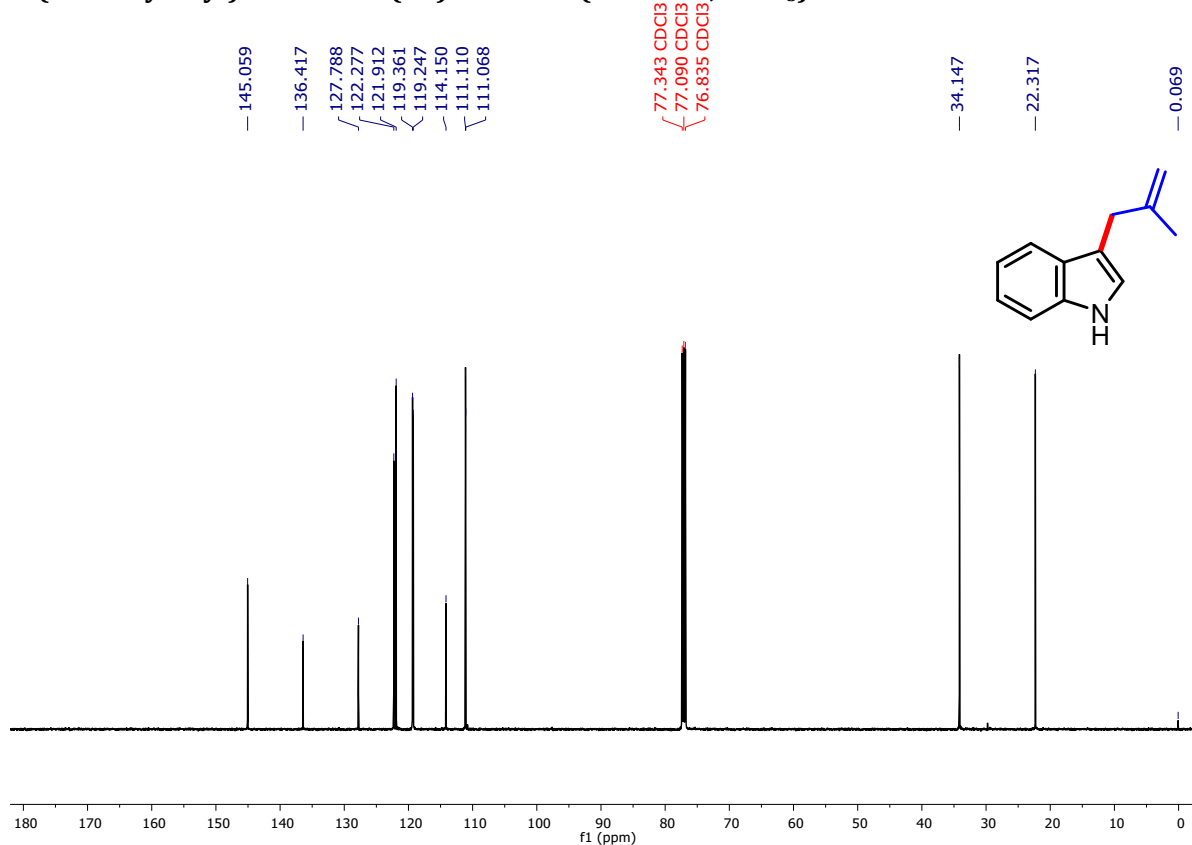

**3-(Hex-2-en-1-yl)-1H-indole (5c): <sup>1</sup>H NMR (500 MHz, CDCl<sub>3</sub>)**

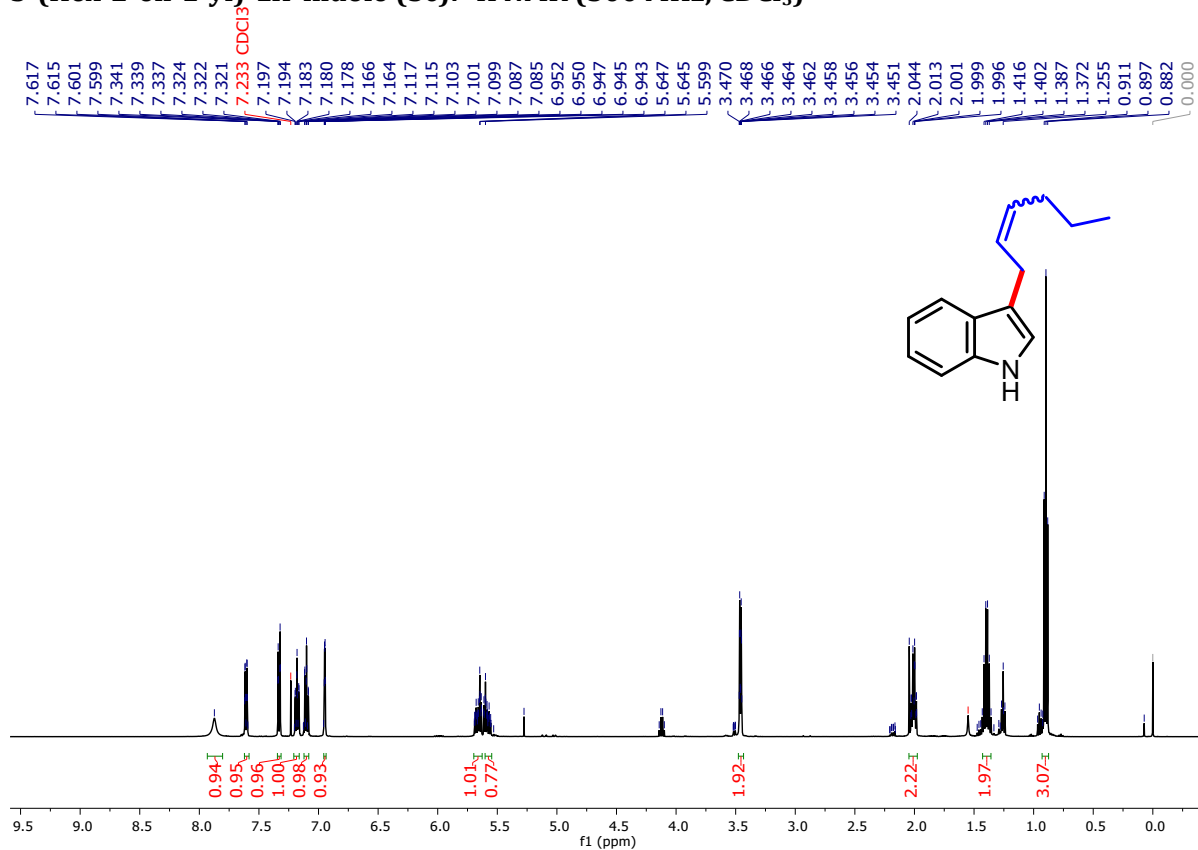

**3-(Hex-2-en-1-yl)-1H-indole (5c): <sup>13</sup>C NMR (125 MHz, CDCl<sub>3</sub>)**

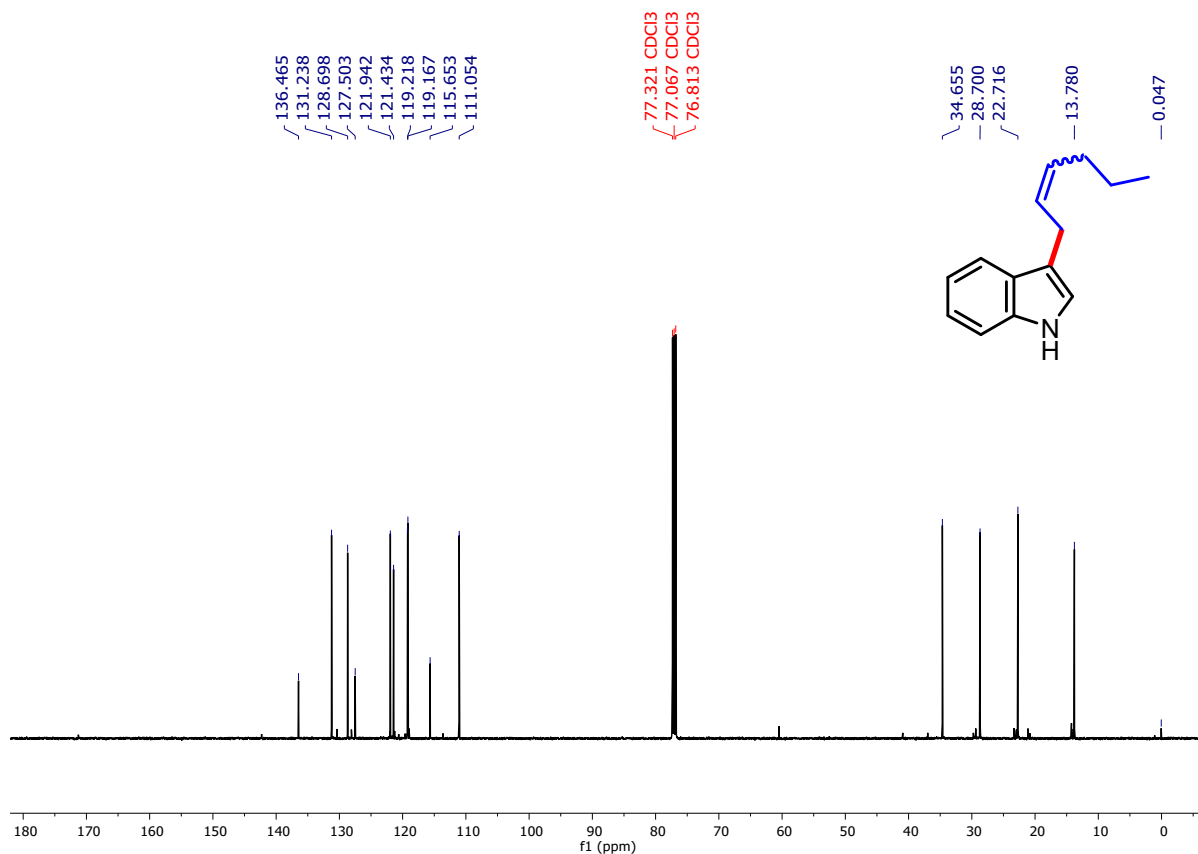

### 3-Cinnamyl-1H-indole (5d): <sup>1</sup>H NMR (500 MHz, CDCl<sub>3</sub>)

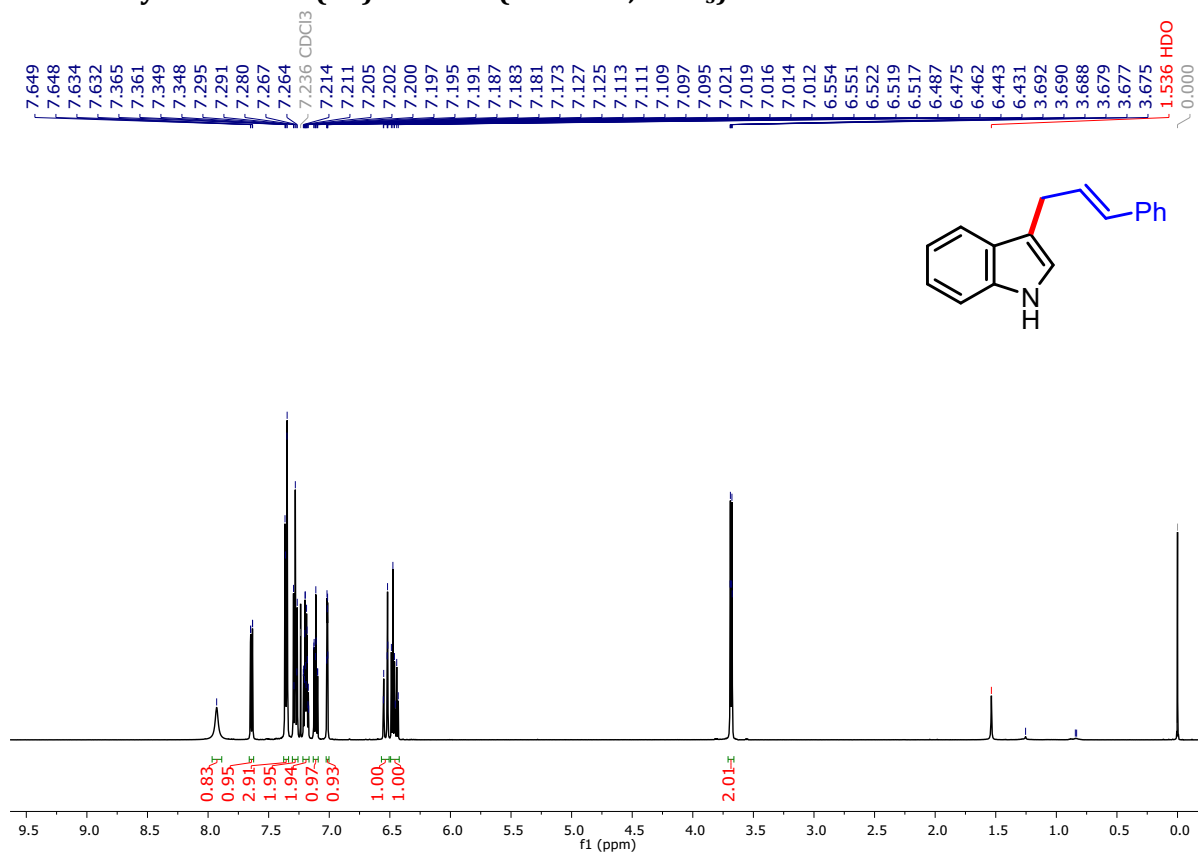

### 3-Cinnamyl-1H-indole (5d): <sup>13</sup>C NMR (125 MHz, CDCl<sub>3</sub>)

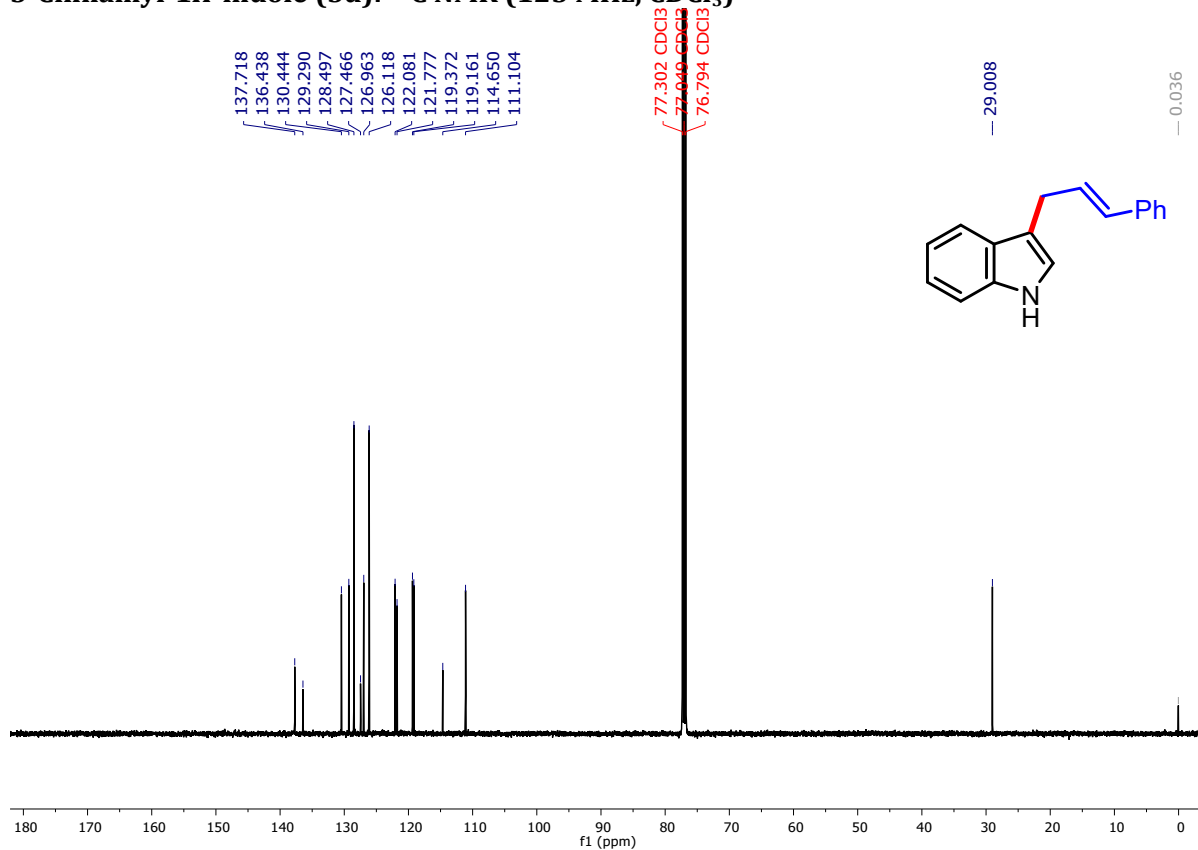

**(E)-3-(1,3-Diphenylallyl)-1H-indole (5e): <sup>1</sup>H NMR (500 MHz, CDCl<sub>3</sub>)**

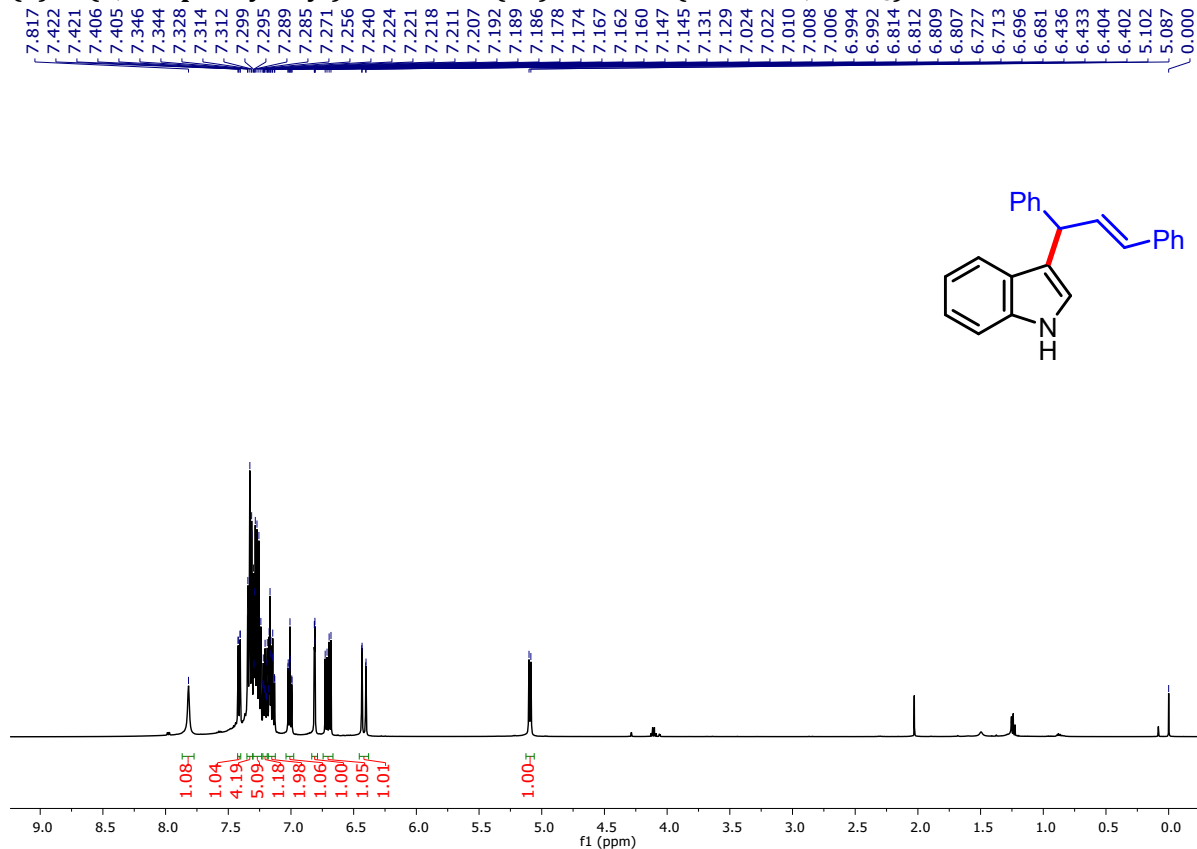

**(E)-3-(1,3-Diphenylallyl)-1H-indole (5e): <sup>13</sup>C NMR (125 MHz, CDCl<sub>3</sub>)**

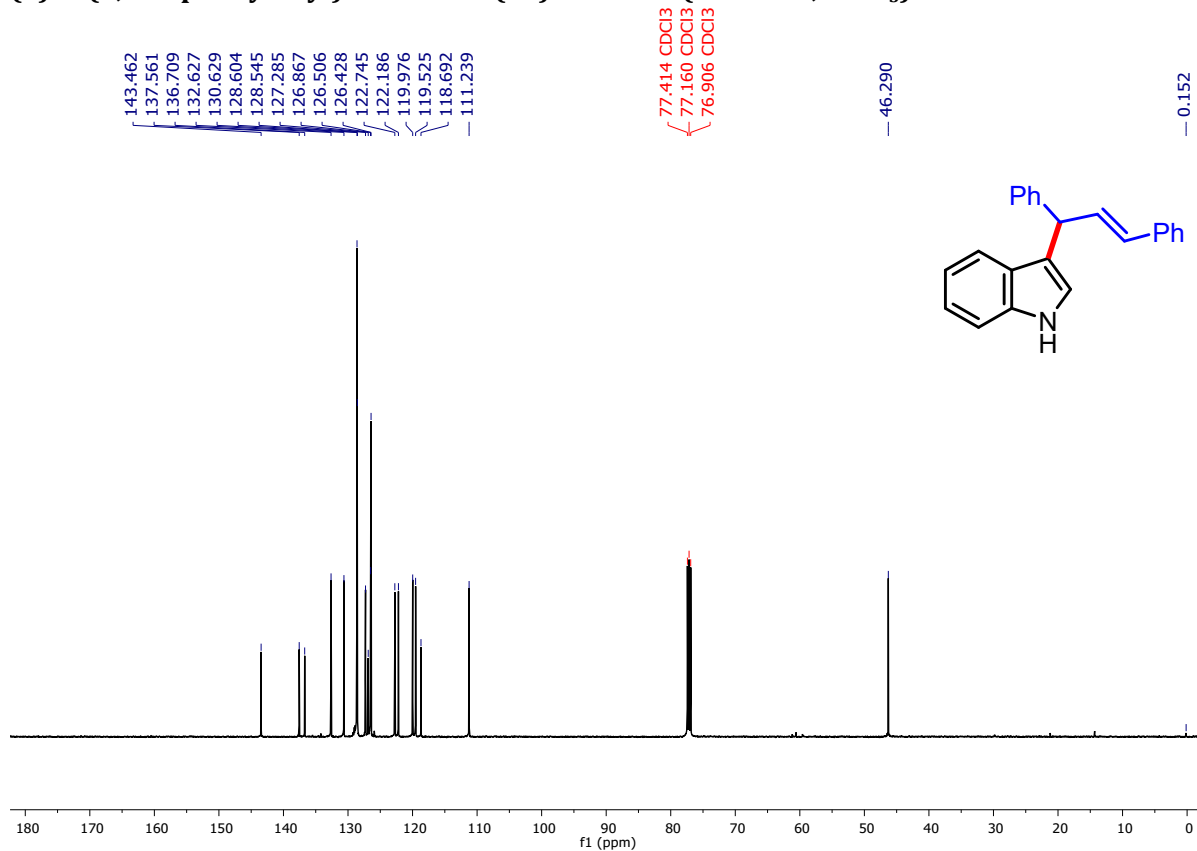

**3-(Cyclohex-2-en-1-yl)-1H-indole (5f): <sup>1</sup>H NMR (500 MHz, CDCl<sub>3</sub>)**

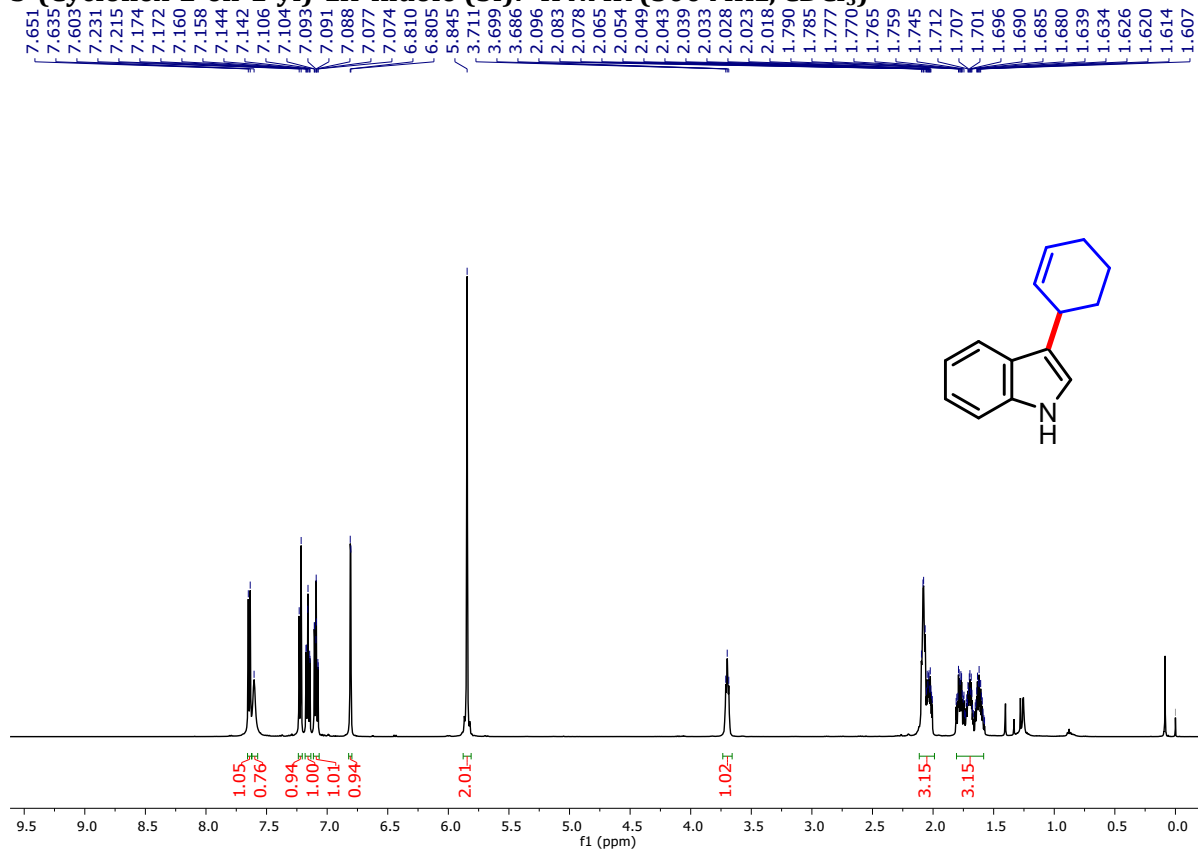

**3-(Cyclohex-2-en-1-yl)-1H-indole (5f): <sup>13</sup>C NMR (125 MHz, CDCl<sub>3</sub>)**

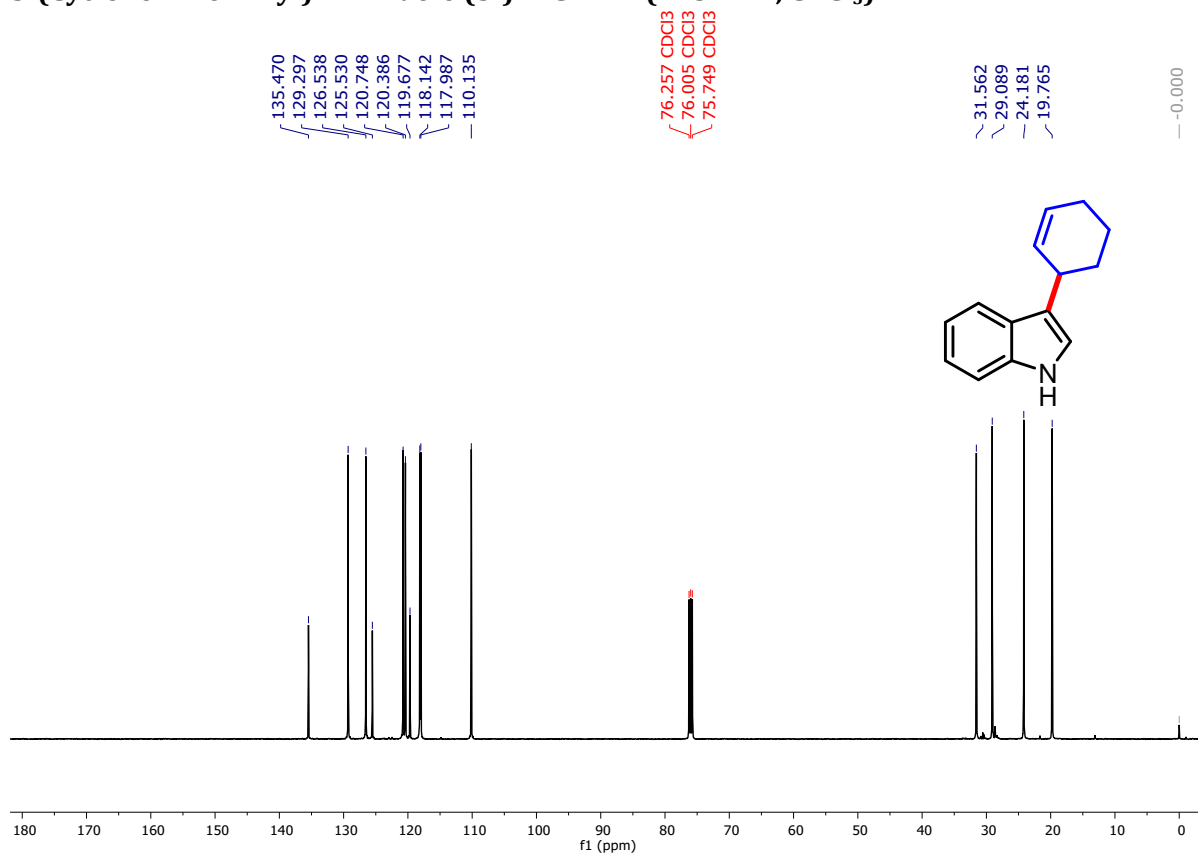

**3,3-Diallylindolin-2-one (6b): <sup>1</sup>H NMR (500 MHz, CDCl<sub>3</sub>)**

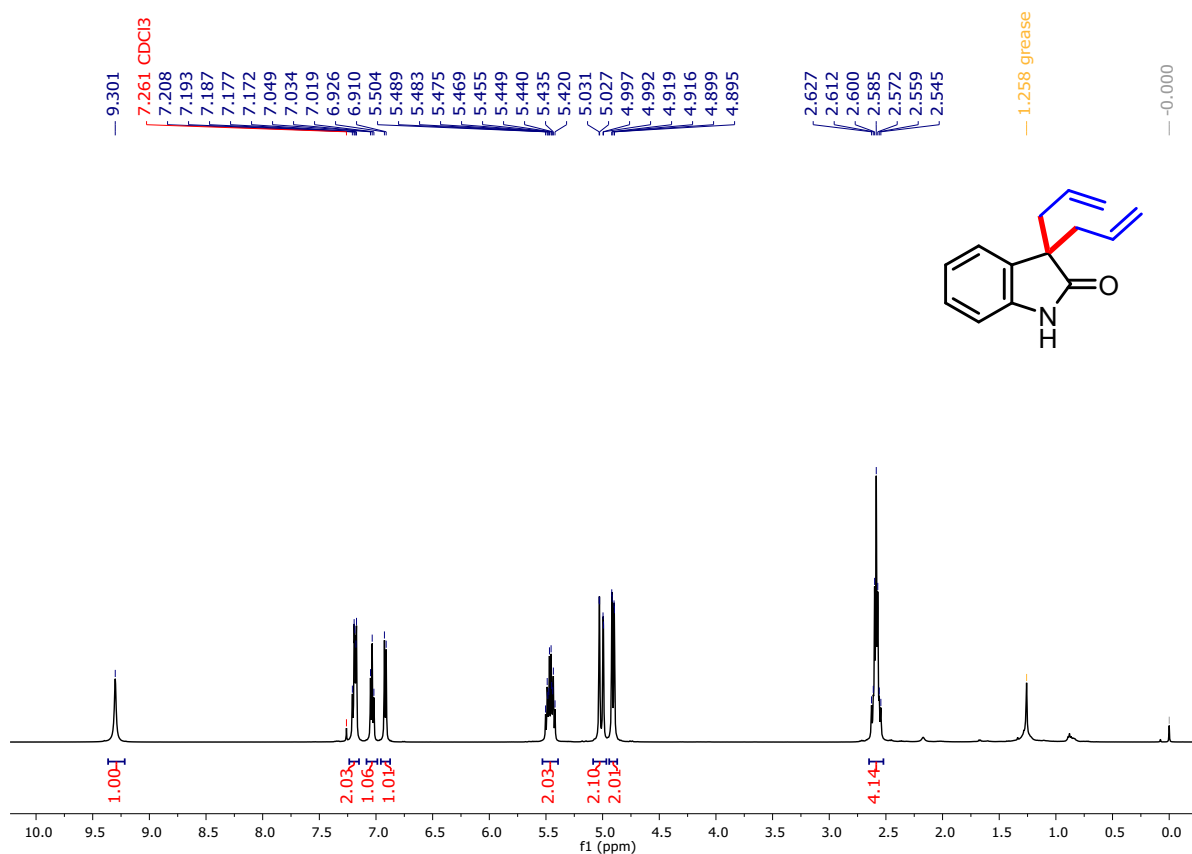

**3,3-Diallylindolin-2-one (6b): <sup>13</sup>C NMR (125 MHz, CDCl<sub>3</sub>)**

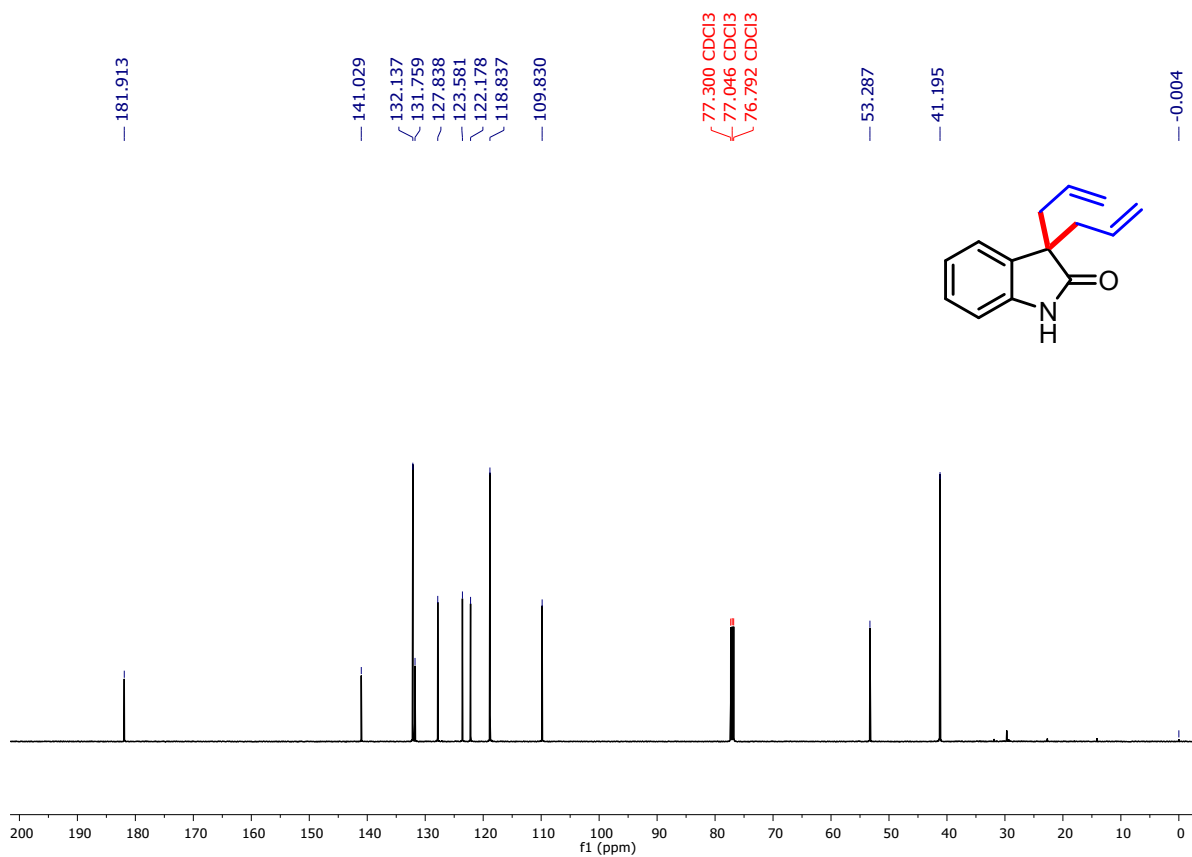

***N*-Allylindoline (7a): <sup>1</sup>H NMR (500 MHz, CDCl<sub>3</sub>)**

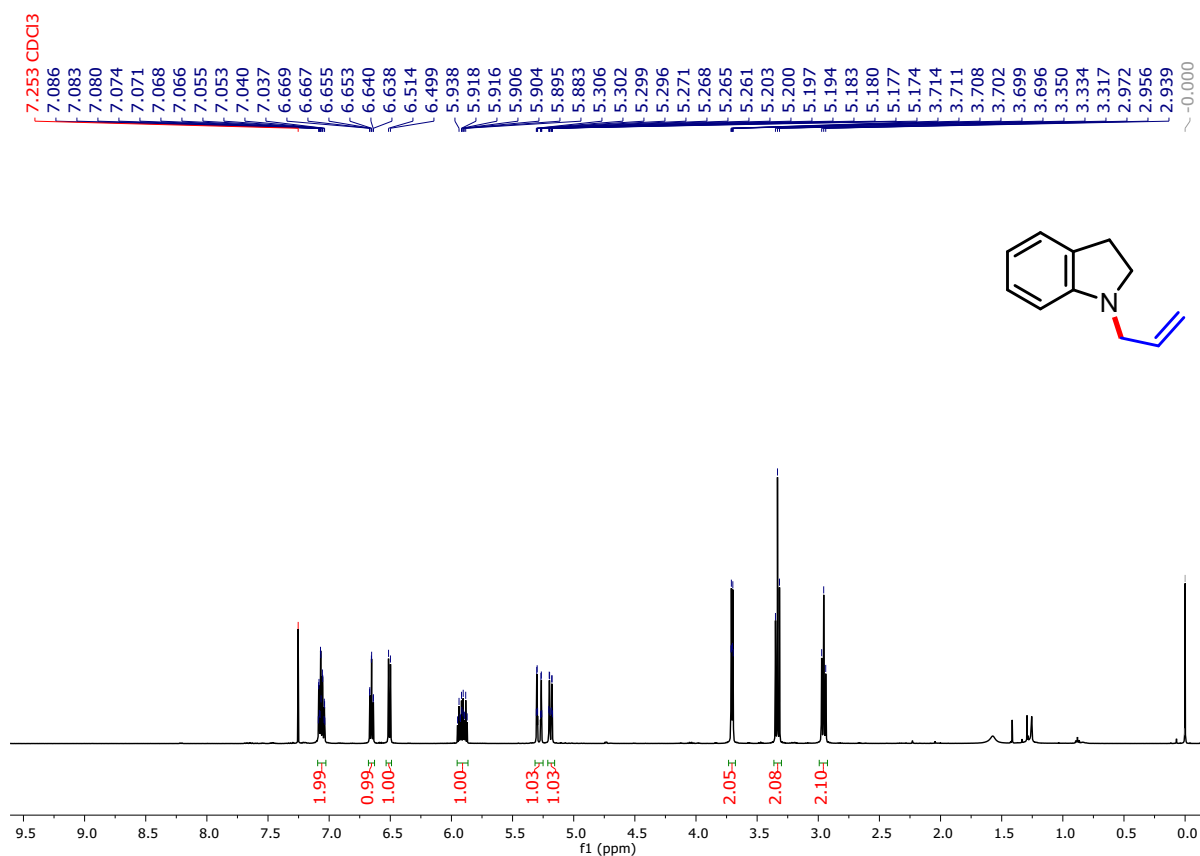

***N*-Allylindoline (7a): <sup>13</sup>C NMR (125 MHz, CDCl<sub>3</sub>)**

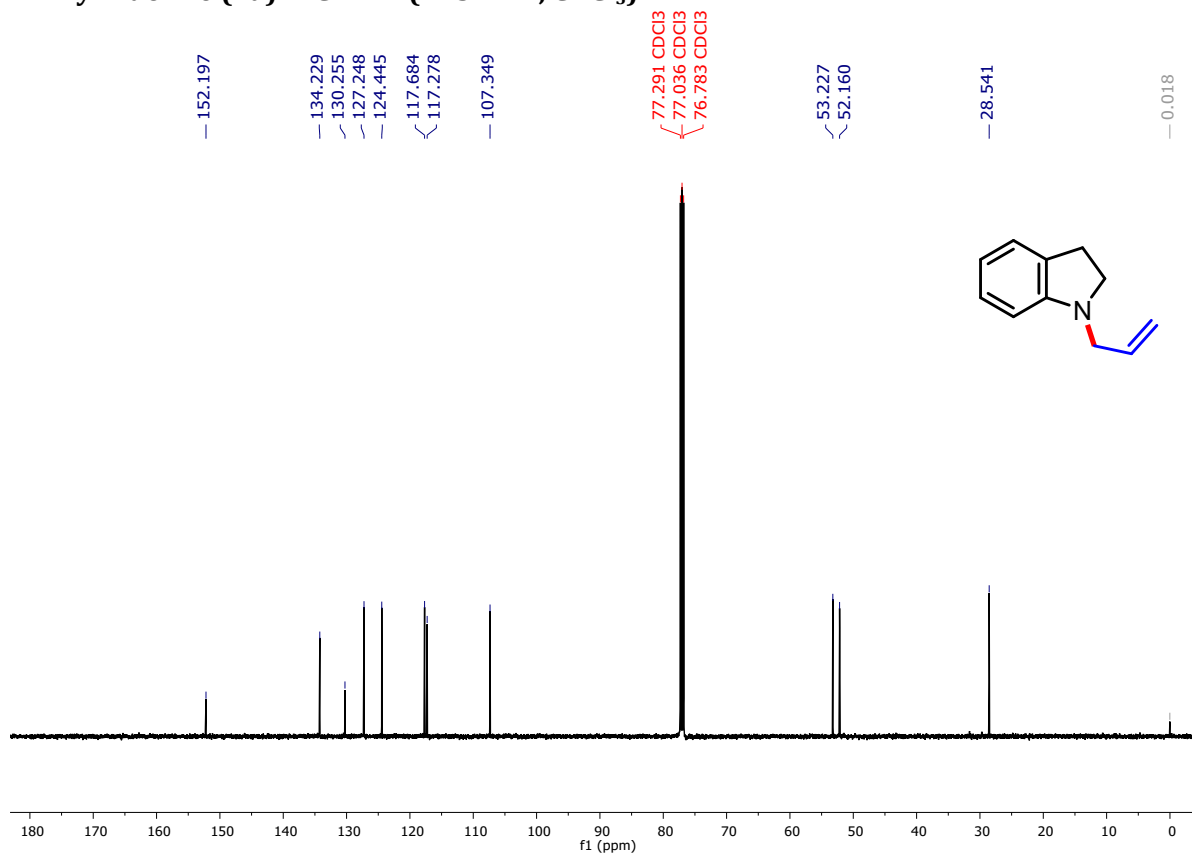

Supplement: d2gc00921h1.pdf [file d2gc00921h1.pdf]
